# Supplementary material
Source: publisher site journal article supplement (https://www.dovepress.com/get_supplementary_file.php?f=264181.xlsx)
Supplement: Supplementary file 1 [file get_supplementary_file.php]

## Sheet: Study database
Supplementary file	The full study dataset
IDENTIFICATION				STRATA			SURVEY WEIGHTS					DEMOGRAPHY												ANTHROPOMETRY					COMORBIDITIES										BIOCHEMISTRY				METABOLIC SYNDROME			CV RISK
Subject ID	Company ID	workers' food program	Analysis set	activity sector	company size	strata	Company weight	Number of companies in the stratum	Number of workers of the same sex in the company	Worker conditional weight	Worker base weight	age (years)	sex	marital status	number of children	education	job title	job category	monthly income (BRL)	income (minimum wages)	In-house formation	smoker	physical activity (met-minute/week)	weight (kg)	height (m)	body mass index (kg/m2)	body mass index class	waist circumference (cm)	hypertension	hypotensive	systolic blood pressure	diastolic blood pressure	diabetes	anti-diabetic medication	hypercholesterolemia	cholesterol-lowering drugs	hypertriglyceridemia	triglycerides-lowering drugs	glucose	total_cholesterol	triglycerides	hdl-c	metabolic syndrome IDF/AHA/NHLBI	metabolic syndrome IDF	metabolic syndrome NCEP-ATP III	10-years cardiovascular risk AHA	10-years cardiovascular risk ASCVD
202	2	Yes	Yes	Textile	Medium	17	2	8	120	8.88889	4.44444	44	Female	Married	1	High-school	Production worker	blue collar	937	1	No	No	2730	67.7	1.57	27.4656	Overweight	89.4	No	No	120	70	No	No	No	No	No	No	86	203	183	26	Yes	Yes	Yes	4.78264	2.34908
204	2	Yes	Yes	Textile	Medium	17	2	8	120	8.88889	4.44444	47	Female	Married	1	Middle school	Production worker	blue collar	937	1	No	No	780	73.7	1.58	29.5225	Overweight	98.5	Yes	No	110	90	No	No	No	No	No	No	81	174	70	54	No	No	No	2.19799	0.588749
205	2	Yes	Yes	Textile	Medium	17	2	8	120	8.88889	4.44444	53	Female	Single	2	Middle school	Production worker	blue collar	937	1	No	No	4771	60.1	1.53	25.6739	Overweight	78.8	No	No	130	90	No	No	No	No	No	No	90	182	102	60	No	No	No	4.46703	1.37783
206	2	Yes	Yes	Textile	Medium	17	2	8	40	8.88889	4.44444	40	Male	Married	0	Illiterate	Production worker	blue collar	937	1	Yes	No	1440	92	1.62	35.0556	Obesity I	108.8	No	No	120	100	No	No	No	No	No	No	105	207	223	32	Yes	Yes	Yes	5.8042	2.03388
208	2	Yes	Yes	Textile	Medium	17	2	8	120	8.88889	4.44444	48	Female	Married	2	High-school	Production worker	blue collar	937	1	Yes	No	1440	65.9	1.59	26.067	Overweight	87.5	Yes	Yes	120	90	No	No	No	No	No	No	79	185	338	24	Yes	Yes	Yes	7.32296	3.42804
210	2	Yes	Yes	Textile	Medium	17	2	8	120	8.88889	4.44444	52	Female	Single	1	Elementary school	Production worker	blue collar	937	1	No	No	360	63	1.53	26.9127	Overweight	79.8	No	No	110	70	No	No	No	No	No	No	92	190	112	38	No	No	No	3.93277	1.58113
211	2	Yes	Yes	Textile	Medium	17	2	8	120	8.88889	4.44444	45	Female	Single	4	Elementary school	Production worker	blue collar	937	1	No	No	3657	83.1	1.66	30.1568	Obesity I	95	Yes	Yes	140	90	No	No	No	No	No	No	96	171	81	38	Yes	Yes	Yes	6.42343	1.81143
212	2	Yes	Yes	Textile	Medium	17	2	8	120	8.88889	4.44444	51	Female	Married	1	Elementary school	Production worker	blue collar	937	1	No	No	1276	64.3	1.57	26.0863	Overweight	83.5	No	No	120	80	No	No	No	No	No	No	86	196	64	70	No	No	No	3.23132	0.875548
213	2	Yes	Yes	Textile	Medium	17	2	8	120	8.88889	4.44444	52	Female	Married	2	Middle school	Production worker	blue collar	937	1	Yes	No	1200	76.4	1.46	35.8416	Obesity I	99.7	No	No	120	80	No	No	Yes	No	Yes	No	96	222	164	42	Yes	Yes	Yes	5.57547	2.02361
214	2	Yes	Yes	Textile	Medium	17	2	8	120	8.88889	4.44444	47	Female	Married	1	Elementary school	Production worker	blue collar	937	1	Yes	No	2880	52.5	1.5	23.3333	Normal weight	75	No	No	100	70	No	No	No	No	No	No	93	193	90	64	No	No	No	1.70201	0.448482
215	2	Yes	Yes	Textile	Medium	17	2	8	120	8.88889	4.44444	43	Female	Single	1	Elementary school	Production worker	blue collar	937	1	Yes	No	960	74.5	1.53	31.8254	Obesity I	96	No	No	120	80	No	No	No	No	No	No	99	203	171	40	Yes	Yes	Yes	3.36575	1.10049
219	2	Yes	Yes	Textile	Medium	17	2	8	120	8.88889	4.44444	47	Female	Divorced	3	Middle school	Production worker	blue collar	937	1	Yes	No	1980	63.7	1.56	26.1752	Overweight	84.5	No	No	110	70	No	No	No	No	No	No	82	170	73	42	No	No	No	2.54886	0.817433
220	2	Yes	Yes	Textile	Medium	17	2	8	40	8.88889	4.44444	28	Male	Single	0	Middle school	Production worker	blue collar	937	1	No	No	2332.5	65.8	1.64	24.4646	Normal weight	78	No	No	110	70	No	No	No	No	No	No	108	162	114	48	No	No	No	0.87835	0.079244
221	2	Yes	Yes	Textile	Medium	17	2	8	40	8.88889	4.44444	43	Male	Married	1	High-school	Machine operator	blue collar	937	1	No	No	0	99	1.63	37.2615	Obesity I	111.2	No	No	160	120	No	No	No	No	No	No	110	234	166	48	Yes	Yes	Yes	9.72513	3.328
222	2	Yes	Yes	Textile	Medium	17	2	8	40	8.88889	4.44444	49	Male	Married	2	High-school	Production worker	blue collar	1700	1.8143	Yes	No	1704	95.5	1.71	32.6596	Obesity I	106.3	No	No	140	100	No	No	No	No	No	No	95	238	317	44	Yes	Yes	Yes	12.218	5.39793
223	2	Yes	Yes	Textile	Medium	17	2	8	120	8.88889	4.44444	32	Female	Single	0	High-school	Production worker	blue collar	937	1	No	No	965	49.2	1.52	21.295	Normal weight	73.3	No	No	110	70	No	No	No	No	No	No	100	207	59	76	No	No	No	0.875366	0.150437
227	2	Yes	Yes	Textile	Medium	17	2	8	120	8.88889	4.44444	43	Female	Divorced	1	High-school	Plant manager	white collar	1500	1.60085	No	No	1840	60.4	1.57	24.504	Normal weight	79.5	No	No	150	100	No	No	No	No	No	No	66	174	59	48	No	No	No	4.51947	0.937439
229	2	Yes	Yes	Textile	Medium	17	2	8	40	8.88889	4.44444	44	Male	Single	0	High-school	Machine operator	blue collar	937	1	No	No	3840	90	1.65	33.0578	Obesity I	108.8	Yes	Yes	120	80	No	No	Yes	Yes	No	No	109	182	167	28	Yes	Yes	Yes	10.1924	3.36331
230	2	Yes	Yes	Textile	Medium	17	2	8	120	8.88889	4.44444	39	Female	Single	0	High-school	Production worker	blue collar	937	1	No	No	1920	91.1	1.42	45.1795	Obesity III	116.5	Yes	Yes	130	90	No	No	No	No	No	No	84	202	114	36	Yes	Yes	Yes	4.78661	1.83165
231	2	Yes	No	Textile	Medium	17	2	8	120	8.88889	4.44444	44	Female	Single	1	High-school	Production worker	blue collar	937	1	No	No	3210	97.1	1.54	40.9428	Obesity III	108.7	No	No	120	90	No	No	No	No	No	No
233	2	Yes	Yes	Textile	Medium	17	2	8	120	8.88889	4.44444	53	Female	Divorced	3	Middle school	Food processing worker	blue collar	937	1	No	No	1440	74.5	1.47	34.4764	Obesity I	102	Yes	Yes	140	90	Yes	Yes	No	No	No	No	209	149	183	38	Yes	Yes	Yes	14.335	5.3048
234	2	Yes	Yes	Textile	Medium	17	2	8	120	8.88889	4.44444	31	Female	Single	2	Middle school	Production worker	blue collar	937	1	No	No	2880	74.1	1.52	32.0724	Obesity I	94.3	No	No	110	90	No	No	No	No	No	No	92	171	50	48	Yes	Yes	Yes	0.893476	0.301784
235	2	Yes	Yes	Textile	Medium	17	2	8	120	8.88889	4.44444	44	Female	Married	2	High-school	Production worker	blue collar	937	1	Yes	No	10080	67.5	1.6	26.3672	Overweight	91.6	No	No	120	80	No	No	No	No	No	No	85	187	106	42	No	No	No	3.1102	0.923332
236	2	Yes	Yes	Textile	Medium	17	2	8	40	8.88889	4.44444	50	Male	Married	4	Middle school	Production worker	blue collar	937	1	No	No	4480	67.2	1.65	24.6832	Normal weight	88.7	No	No	130	90	No	No	No	No	No	No	108	196	179	44	Yes	No	No	9.20619	3.95506
237	2	Yes	Yes	Textile	Medium	17	2	8	120	8.88889	4.44444	33	Female	Married	0	High-school	Production worker	blue collar	937	1	No	No	825	58	1.52	25.1039	Overweight	76.5	No	No	100	70	No	No	No	No	No	No	102	160	56	52	No	No	No	0.693283	0.173522
238	2	Yes	Yes	Textile	Medium	17	2	8	120	8.88889	4.44444	32	Female	Married	1	High-school	Production worker	blue collar	937	1	Yes	No	3060	47.6	1.57	19.3111	Normal weight	66.2	No	No	120	90	No	No	No	No	No	No	85	175	65	48	No	No	No	1.25573	0.382075
239	2	Yes	Yes	Textile	Medium	17	2	8	40	8.88889	4.44444	50	Male	Married	0	Middle school	Production worker	blue collar	1400	1.49413	Yes	No	1440	72.2	1.67	25.8883	Overweight	91.9	Yes	No	140	100	No	No	No	No	No	No	99	202	160	40	No	No	No	11.8397	5.17826
240	2	Yes	Yes	Textile	Medium	17	2	8	120	8.88889	4.44444	46	Female	Married	3	Middle school	Machine operator	blue collar	937	1	No	No	3840	58.8	1.52	25.4501	Overweight	91.1	No	No	110	70	No	No	No	No	No	No	98	170	34	56	No	No	No	1.98312	0.490392
241	2	Yes	Yes	Textile	Medium	17	2	8	120	8.88889	4.44444	27	Female	Married	0	High-school	Manufacturing technician	white collar	1500	1.60085	Yes	No	0	69.4	1.65	25.4913	Overweight	76.7	No	No			No	No	No	No	No	No	93	175	36	56	No	No	No		2.2e-05
242	2	Yes	No	Textile	Medium	17	2	8	120	8.88889	4.44444	29	Female	Single	2	High-school	Production worker	blue collar	937	1	No	No	3300	54.4	1.58	21.7914	Normal weight	70.3	No	No	100	70	No	No	No	No	No	No
243	2	Yes	Yes	Textile	Medium	17	2	8	40	8.88889	4.44444	52	Male	Married	3	Middle school	Production worker	blue collar	1200	1.28068	No	No	617	60.8	1.68	21.542	Normal weight	77.8	No	No	110	70	Yes	No	No	No	No	No	115	209	103	54	No	No	No	11.6846	0.005203
244	2	Yes	Yes	Textile	Medium	17	2	8	120	8.88889	4.44444	33	Female	Married	2	High-school	Production worker	blue collar	937	1	Yes	No	1455	71	1.63	26.7229	Overweight	90.1	No	No	120	80	No	No	No	No	No	No	107	133	127	32	Yes	Yes	No	1.28996	0.527286
245	2	Yes	Yes	Textile	Medium	17	2	8	120	8.88889	4.44444	30	Female	Single	1	High-school	Production worker	blue collar	937	1	No	No	3975	60.6	1.57	24.5852	Normal weight	76.5	No	No	90	60	No	No	No	No	No	No	65	166	72	52	No	No	No	0.434554	0.149678
246	2	Yes	Yes	Textile	Medium	17	2	8	120	8.88889	4.44444	36	Female	Married	1	Middle school	Production worker	blue collar	937	1	No	No	1480	54.1	1.48	24.6987	Normal weight	72	No	No	100	60	No	No	Yes	No	No	No	84	214	56	46	No	No	No	1.31211	0.518812
247	2	Yes	Yes	Textile	Medium	17	2	8	120	8.88889	4.44444	40	Female	Married	3	Elementary school	Production worker	blue collar	1800	1.92102	No	No	7611	84	1.55	34.9636	Obesity I	104.8	No	No	110	70	Yes	No	Yes	No	Yes	No	93	207	161	30	Yes	Yes	Yes	5.22879	2.89173
248	2	Yes	Yes	Textile	Medium	17	2	8	40	8.88889	4.44444	26	Male	Single	0	Middle school	Machine operator	blue collar	937	1	No	No	0	75.8	1.81	23.1373	Normal weight	80.7	No	No	110	70	No	No	No	No	No	No	90	178	125	48	No	No	No	0.778624	0.070357
301	3	No	Yes	Food and beverages	Medium	2	2	6	83	9.22222	4.61111	31	Female	Married	3	Middle school	Production worker	blue collar	937	1	No	No	1500	70.7	1.64	26.2864	Overweight	77.8	No	No	100	70	No	No	No	No	No	No	84	146	119	52	No	No	No	0.536954	0.128108
302	3	No	Yes	Food and beverages	Medium	2	2	6	83	9.22222	4.61111	45	Female	Single	2	Middle school	Production worker	blue collar	937	1	No	No	4640	73.3	1.52	31.7261	Obesity I	94	No	No	140	100	No	No	No	No	No	No	79	179	85	56	No	No	No	3.86589	0.781269
303	3	No	Yes	Food and beverages	Medium	2	2	6	83	9.22222	4.61111	36	Female	Single	1	High-school	Production worker	blue collar	937	1	No	No	2160	66.6	1.58	26.6784	Overweight	94.2	No	No	110	70	No	No	No	No	No	No	95	186	88	44	No	No	No	1.48573	0.49584
306	3	No	Yes	Food and beverages	Medium	2	2	6	83	9.22222	4.61111	50	Female	Single	4	Elementary school	Production worker	blue collar	937	1	No	No	1680	84	1.55	34.9636	Obesity I	110.3	No	No	120	80	No	No	Yes	Yes	No	No	92	170	70	46	No	No	No	3.49298	1.09784
307	3	No	Yes	Food and beverages	Medium	2	2	6	83	9.22222	4.61111	31	Female	Married	2	Middle school	Production worker	blue collar	937	1	No	No	2291.25	55.1	1.48	25.1552	Overweight	75.7	No	No	110	80	No	No	No	No	No	No	72	146	94	44	No	No	No	0.785405	0.244841
309	3	No	Yes	Food and beverages	Medium	2	2	6	83	9.22222	4.61111	49	Female	Single	3	Elementary school	Production worker	blue collar	937	1	No	No	2220	75.3	1.57	30.5489	Obesity I	90.8	No	No	120	80	No	No	No	No	No	No	86	166	140	52	No	No	No	2.97644	0.827175
311	3	No	Yes	Food and beverages	Medium	2	2	6	83	9.22222	4.61111	53	Female	Single	0	High-school	Production worker	blue collar	937	1	No	No	3070	74.8	1.59	29.5874	Overweight	98.5	No	No	120	80	No	No	No	No	No	No	78	247	163	48	Yes	Yes	Yes	6.01853	2.13678
313	3	No	Yes	Food and beverages	Medium	2	2	6	83	9.22222	4.61111	35	Female	Divorced	3	Middle school	Production worker	blue collar	937	1	No	No	4335	57.8	1.47	26.7481	Overweight	86.3	No	No	100	70	No	No	No	No	No	No	74	185	146	44	No	No	No	1.06471	0.398176
334	3	No	Yes	Food and beverages	Medium	2	2	6	83	9.22222	4.61111	51	Female	Married	4	Middle school	Production worker	blue collar	937	1	No	No	4200	63.9	1.46	29.9775	Overweight	96.8	No	No	120	80	No	No	Yes	Yes	No	No	81	194	84	48	No	No	No	4.14955	1.35376
337	3	No	Yes	Food and beverages	Medium	2	2	6	83	9.22222	4.61111	41	Female	Single	2	High-school	Production worker	blue collar	937	1	No	No	2148	53.3	1.52	23.0696	Normal weight	79	No	No			No	No	No	No	No	No	80	190	85	52	No	No	No		4.6e-05
339	3	No	No	Food and beverages	Medium	2	2	6	34	68	34	32	Male	Married	1	Graduate	Manufacturing technician	white collar	2000	2.13447	Yes	No	3350	74.5	1.71	25.4779	Overweight	83.4	No	No	130	80	No	No	No	No	No	No
340	3	No	Yes	Food and beverages	Medium	2	2	6	83	9.22222	4.61111	29	Female	Married	1	High-school	Plant manager	white collar	1400	1.49413	No	No	1356	82	1.53	35.0293	Obesity I	105.3	No	No	120	80	No	No	No	No	No	No	83	176	162	60	No	No	No	0.860097	0.20677
341	3	No	Yes	Food and beverages	Medium	2	2	6	83	9.22222	4.61111	28	Female	Single	0	High-school	Manufacturing technician	white collar	1400	1.49413	No	No	1098	63.7	1.59	25.1968	Overweight	76.4	No	No	130	90	No	No	No	No	No	No	79	161	57	70	No	No	No	0.796157	0.114597
342	3	No	Yes	Food and beverages	Medium	2	2	6	83	9.22222	4.61111	28	Female	Single	1	Middle school	Manufacturing technician	white collar	937	1	No	No	1320	73.3	1.58	29.3623	Overweight	97.8	No	No	110	80	Yes	No	No	No	No	No	86	161	68	80	No	No	No	0.858432	0.106018
343	3	No	Yes	Food and beverages	Medium	2	2	6	83	9.22222	4.61111	34	Female	Married	3	Middle school	Machine operator	blue collar	937	1	No	No	594	94.4	1.55	39.2924	Obesity I	107	No	No	130	80	No	No	Yes	No	No	No	78	173	197	44	Yes	Yes	Yes	1.88606	0.552779
344	3	No	Yes	Food and beverages	Medium	2	2	6	83	9.22222	4.61111	43	Female	Married	1	Middle school	Food processing worker	blue collar	937	1	No	No	600	84.8	1.56	34.8455	Obesity I	107.3	No	No	120	80	No	No	No	No	Yes	No	86	267	957	34	Yes	Yes	Yes	5.20976	2.39134
345	3	No	Yes	Food and beverages	Medium	2	2	6	83	9.22222	4.61111	32	Female	Married	1	High-school	Production worker	blue collar	945	1.00854	No	No	1200	82.8	1.55	34.4641	Obesity I	107.3	No	No	150	100	No	No	No	No	Yes	No	89	177	214	30	Yes	Yes	Yes	3.25571	2.11551
346	3	No	Yes	Food and beverages	Medium	2	2	6	83	9.22222	4.61111	38	Female	Single	4	Elementary school	Production worker	blue collar	937	1	No	No	480	85.6	1.6	33.6475	Obesity I	94.7	No	No	120	80	No	No	No	No	No	No	86	158	82	54	No	No	No	1.52137	0.282008
347	3	No	Yes	Food and beverages	Medium	2	2	6	83	9.22222	4.61111	53	Female	Married	5	Middle school	Production worker	blue collar	937	1	No	No	1200	73.3	1.55	30.7077	Obesity I	98.5	No	No	160	80	Yes	Yes	No	No	No	No	119	232	276	46	Yes	Yes	Yes	21.8726	6.8939
502	5	No	No	Food and beverages	Small	1	3	12	40	5.71429	1.90476	23	Male	Single	0	Graduate	Plant manager	white collar	2500	2.66809	No	No	1920	82.8	1.84	24.4565	Normal weight	81.1	No	No	110	80	No	No	No	No	No	No
503	5	No	No	Food and beverages	Small	1	3	12	40	5.71429	1.90476	29	Male	Single	0	Middle school	Machine operator	blue collar	1013	1.08111	No	No	0	68.3	1.66	24.7859	Normal weight	82.4	No	No	110	80	No	No	No	No	No	No
504	5	No	Yes	Food and beverages	Small	1	3	12	10	4.28571	1.42857	33	Female	Single	0	Middle school	Production worker	blue collar	937	1	No	No	4200	60.6	1.62	23.091	Normal weight	73	No	No	100	60	No	No	No	No	No	No	74	170	69	62	No	No	No	0.658735	0.129761
511	5	No	Yes	Food and beverages	Small	1	3	12	40	5.71429	1.90476	39	Male	Single	0	Illiterate	Production worker	blue collar	937	1	No	No	1432	59.3	1.7	20.519	Normal weight	74.1	No	No	120	80	No	No	No	No	No	No	83	114	54	40	No	No	No	2.27262	0.377119
513	5	No	No	Food and beverages	Small	1	3	12	40	5.71429	1.90476	39	Male	Single	0	Elementary school	Machine operator	blue collar	937	1	No	No	475.2	62.7	1.68	22.2151	Normal weight	75.7	No	No	120	80	No	No	No	No	No	No
514	5	No	No	Food and beverages	Small	1	3	12	40	5.71429	1.90476	39	Male	Single	2	Elementary school	Production worker	blue collar	1145	1.22199	Yes	No	40	80.3	1.79	25.0616	Overweight	90.3	No	No	120	80	No	No	No	No	No	No
515	5	No	Yes	Food and beverages	Small	1	3	12	40	5.71429	1.90476	41	Male	Married	3	High-school	Plant manager	white collar	2200	2.34792	Yes	No	3720	75	1.65	27.5482	Overweight	85.4	Yes	No	120	80	No	No	No	No	No	No	94	141	68	50	No	No	No	2.72498	0.569008
516	5	No	Yes	Food and beverages	Small	1	3	12	40	5.71429	1.90476	25	Male	Married	0	High-school	Plant manager	white collar	1218	1.29989	Yes	No	2160	74.5	1.74	24.6069	Normal weight	81.5	No	No	120	80	No	No	No	No	No	No	92	128	77	42	No	No	No	0.639288	0.030619
518	5	No	Yes	Food and beverages	Small	1	3	12	10	4.28571	1.42857	29	Female	Married	0	Middle school	Production worker	blue collar	937	1	No	No	1200	73.8	1.64	27.439	Overweight	85.5	No	No	100	70	No	No	No	No	No	No	80	160	60	86	No	No	No	0.359902	0.037105
527	5	No	Yes	Food and beverages	Small	1	3	12	40	5.71429	1.90476	39	Male	Divorced	1	Elementary school	Production worker	blue collar	937	1	No	No	2880	53.5	1.68	18.9555	Normal weight	68.5	No	No	130	100	No	No	No	No	No	No	92	190	52	74	No	No	No	2.64856	0.499708
528	5	No	Yes	Food and beverages	Small	1	3	12	40	5.71429	1.90476	39	Male	Married	5	Middle school	Production worker	blue collar	937	1	No	No	1580	90.1	1.65	33.0946	Obesity I	99	No	No	120	80	No	No	No	No	No	No	106	181	421	30	Yes	Yes	No	4.92847	1.52334
529	5	No	No	Food and beverages	Small	1	3	12	40	5.71429	1.90476	37	Male	Married	3	Middle school	Plant manager	white collar	1200	1.28068	No	No	720	95.3	1.69	33.3672	Obesity I	106.3	Yes	No	160	110	No	No	No	No	No	No
530	5	No	Yes	Food and beverages	Small	1	3	12	40	5.71429	1.90476	32	Male	Married	1	Middle school	Machine operator	blue collar	1013	1.08111	No	No	3240	72	1.7	24.9135	Normal weight	81	No	No	120	80	No	No	No	No	No	No	89	125	113	58	No	No	No	0.979113	0.069952
531	5	No	Yes	Food and beverages	Small	1	3	12	40	5.71429	1.90476	48	Male	Married	2	Elementary school	Machine operator	blue collar	937	1	No	Yes	792	57	1.7	19.7232	Normal weight	73	No	No	120	70	No	No	No	No	No	No	95	132	45	70	No	No	No	5.67621	100
532	5	No	Yes	Food and beverages	Small	1	3	12	40	5.71429	1.90476	47	Male	Married	3	Elementary school	Machine operator	blue collar	1000	1.06724	No	No	960	79.8	1.7	27.6125	Overweight	90.8	No	No	120	80	No	No	No	No	No	No	93	163	83	40	No	No	No	5.90089	2.12403
534	5	No	No	Food and beverages	Small	1	3	12	10	4.28571	1.42857	36	Female	Married	1	Graduate	Plant manager	white collar	2200	2.34792	Yes	No	3840	50.9	1.6	19.8828	Normal weight	74.8	Yes	No	100	70	No	No	No	No	No	No
535	5	No	Yes	Food and beverages	Small	1	3	12	40	5.71429	1.90476	36	Male	Single	2	Elementary school	Production worker	blue collar	979	1.04482	No	Yes	1440	58.2	1.68	20.6207	Normal weight	73.3	No	No	100	70	No	No	No	No	No	No	87	161	106	44	No	No	No	3.22881	99.9653
536	5	No	Yes	Food and beverages	Small	1	3	12	40	5.71429	1.90476	58	Male	Married	1	High-school	Plant manager	white collar	3842	4.10032	Yes	Yes	1568	81.5	1.75	26.6122	Overweight	95.8	Yes	Yes			Yes	Yes	No	No	No	No	114	175	86	38	Yes	Yes	Yes		0.005273
537	5	No	Yes	Food and beverages	Small	1	3	12	40	5.71429	1.90476	24	Male	Single	1	High-school	Machine operator	blue collar	1100	1.17396	No	No	1568	61.2	1.82	18.476	Underweight	74.4	No	No	100	70	No	No	No	No	No	No	94	184	73	66	No	No	No	0.391688	0.020341
538	5	No	No	Food and beverages	Small	1	3	12	40	5.71429	1.90476	22	Male	Single	1	Elementary school	Machine operator	blue collar	1013	1.08111	No	No	1920	88.3	1.85	25.7999	Overweight	83.6	No	No	120	80	No	No	No	No	No	No
539	5	No	No	Food and beverages	Small	1	3	12	40	5.71429	1.90476	18	Male	Single	1	Elementary school	Production worker	blue collar	937	1	No	No	240	58.1	1.67	20.8326	Normal weight	71.7	No	No			Yes	No	No	No	No	No
540	5	No	No	Food and beverages	Small	1	3	12	40	5.71429	1.90476	20	Male	Married	0	Middle school	Machine operator	blue collar	1013	1.08111	No	No	720	75.4	1.81	23.0152	Normal weight	78	No	No	120	80	No	No	No	No	No	No
541	5	No	Yes	Food and beverages	Small	1	3	12	10	4.28571	1.42857	20	Female	Single	0	High-school	Production worker	blue collar	937	1	No	No	2880	71.2	1.57	28.8856	Overweight	84.5	No	No	120	80	No	No	No	No	No	No	78	226	40	76	No	No	No	0.415231	0.455197
542	5	No	Yes	Food and beverages	Small	1	3	12	10	4.28571	1.42857	43	Female	Married	2	Elementary school	Machine operator	blue collar	937	1	No	No	7314	53.5	1.61	20.6396	Normal weight	71.1	No	No	100	60	No	No	No	No	No	No	77	110	56	48	No	No	No	0.863244	0.184074
543	5	No	Yes	Food and beverages	Small	1	3	12	40	5.71429	1.90476	22	Male	Single	0	High-school	Production worker	blue collar	942	1.00534	No	No	0	72.6	1.78	22.9138	Normal weight	79.3	No	No	100	80	No	No	No	No	No	No	83	200	60	54	No	No	No	0.397394	0.027392
544	5	No	No	Food and beverages	Small	1	3	12	10	4.28571	1.42857	26	Female	Married	0	Graduate	Plant manager	white collar	1230	1.3127	Yes	No	3320	72.8	1.61	28.0853	Overweight	87	No	No	100	70	No	No	Yes	No	No	No
545	5	No	Yes	Food and beverages	Small	1	3	12	10	4.28571	1.42857	29	Female	Married	1	High-school	Administrative assistant	white collar	1450	1.54749	Yes	No	4200	57.1	1.59	22.5861	Normal weight	76.3	No	No	110	70	No	No	No	No	No	No	91	212	125	44	No	No	No	1.05414	0.772326
546	5	No	Yes	Food and beverages	Small	1	3	12	40	5.71429	1.90476	29	Male	Single	2	Elementary school	Production worker	blue collar	940	1.0032	No	No	4876	89.9	1.73	30.0378	Obesity I	98.6	No	No	120	70	No	No	No	No	No	No	88	219	375	36	Yes	Yes	No	2.11011	0.480975
601	6	No	Yes	Food and beverages	Medium	2	2	6	152	21.7143	10.8571	39	Male	Married	2	Middle school	Plant manager	white collar	2228	2.3778	No	No	1211	64.9	1.78	20.4835	Normal weight	78.4	No	No	120	80	No	No	No	No	No	No	89	195	94	42	No	No	No	3.93574	1.07394
603	6	No	Yes	Food and beverages	Medium	2	2	6	152	21.7143	10.8571	23	Male	Married	0	High-school	Manufacturing technician	white collar	1200	1.28068	No	No	40	72.3	1.7	25.0173	Overweight	83.2	No	No	110	70	No	No	No	No	No	No	80	197	104	42	No	No	No	0.679408	0.071826
607	6	No	Yes	Food and beverages	Medium	2	2	6	152	21.7143	10.8571	26	Male	Married	0	Middle school	Machine operator	blue collar	1050	1.1206	No	No	1460	71	1.71	24.281	Normal weight	80.2	No	No	100	70	No	No	No	No	No	No	89	156	118	58	No	No	No	0.468768	0.025679
612	6	No	Yes	Food and beverages	Medium	2	2	6	152	21.7143	10.8571	24	Male	Married	1	High-school	Manufacturing technician	white collar	1400	1.49413	No	No	960	70.2	1.68	24.8724	Normal weight	82.1	No	No	110	60	No	No	No	No	No	No	78	178	198	36	No	No	No	0.796887	0.09033
613	6	No	Yes	Food and beverages	Medium	2	2	6	152	21.7143	10.8571	24	Male	Married	0	Middle school	Machine operator	blue collar	1100	1.17396	No	No	3546	66	1.72	22.3094	Normal weight	74.7	No	No	120	80	No	No	No	No	No	No	86	141	111	34	No	No	No	0.765498	0.054779
614	6	No	Yes	Food and beverages	Medium	2	2	6	152	21.7143	10.8571	25	Male	Single	0	High-school	Machine operator	blue collar	1300	1.38741	No	No	2280	83.9	1.72	28.3599	Overweight	88.1	No	No	100	60	No	No	No	No	No	No	82	177	86	48	No	No	No	0.571316	0.047266
618	6	No	No	Food and beverages	Medium	2	2	6	152	21.7143	10.8571	26	Male	Married	2	Middle school	Administrative assistant	white collar	1600	1.70758	Yes	No	0	81.8	1.64	30.4134	Obesity I	99.4	No	No	140	90	No	No	Yes	No	No	No
619	6	No	Yes	Food and beverages	Medium	2	2	6	152	21.7143	10.8571	30	Male	Married	0	Middle school	Machine operator	blue collar	1300	1.38741	No	No	990	91.5	1.76	29.539	Overweight	102.8	No	No	120	90	No	No	No	No	No	No	75	188	118	54	No	No	No	1.35619	0.163665
622	6	No	Yes	Food and beverages	Medium	2	2	6	152	21.7143	10.8571	50	Male	Married	3	Middle school	Food processing worker	blue collar	1405	1.49947	No	No	448.7	80.1	1.59	31.6839	Obesity I	99.5	No	No	150	90	No	No	No	No	No	No	86	194	547	26	Yes	Yes	Yes	18.587	8.59335
623	6	No	No	Food and beverages	Medium	2	2	6	152	21.7143	10.8571	41	Male	Married	0	Middle school	Food processing worker	blue collar	1125	1.20064	No	No	1260	74	1.7	25.6055	Overweight	82.7	No	No	120	80	No	No	No	No	No	No
625	6	No	Yes	Food and beverages	Medium	2	2	6	152	21.7143	10.8571	23	Male	Single	0	High-school	Food processing worker	blue collar	954	1.01814	No	No	1920	65.4	1.66	23.7335	Normal weight	74.3	No	No	130	90	No	No	No	No	No	No	78	145	76	36	No	No	No	0.767459	0.048088
627	6	No	No	Food and beverages	Medium	2	2	6	152	21.7143	10.8571	37	Male	Married	3	High-school	Food processing worker	blue collar	1300	1.38741	No	No	2174	81.9	1.67	29.3664	Overweight	91.5	No	No			No	No	No	No	No	No
628	6	No	Yes	Food and beverages	Medium	2	2	6	41	6.83333	3.41667	24	Female	Single	0	Graduate	Plant manager	white collar	937	1	Yes	No	1800	74.3	1.64	27.6249	Overweight	85.1	Yes	No	100	70	No	No	No	No	No	No	94	203	76	44	No	No	No	0.496165	0.893722
629	6	No	No	Food and beverages	Medium	2	2	6	41	6.83333	3.41667	24	Female	Married	0	High-school	Machine operator	blue collar	937	1	No	No	3285	54.9	1.54	23.1489	Normal weight	73.3	No	No	100	80	No	No	No	No	No	No
632	6	No	Yes	Food and beverages	Medium	2	2	6	152	21.7143	10.8571	30	Male	Married	1	High-school	Machine operator	blue collar	1050	1.1206	No	No	640	94.7	1.75	30.9224	Obesity I	104.3	No	No	90	60	No	No	No	No	No	No	88	152	80	54	No	No	No	0.614754	0.054455
638	6	No	Yes	Food and beverages	Medium	2	2	6	41	6.83333	3.41667	32	Female	Single	2	High-school	Machine operator	blue collar	954	1.01814	No	No	1120	68.9	1.63	25.9325	Overweight	83.2	No	No	100	70	No	No	No	No	No	No	78	186	128	56	No	No	No	0.734451	0.209864
643	6	No	No	Food and beverages	Medium	2	2	6	41	6.83333	3.41667	27	Female	Married	2	High-school	Administrative assistant	white collar	1908	2.03629	Yes	No	960	48.7	1.59	19.2635	Normal weight	70.3	No	No	90	60	No	No	No	No	No	No
644	6	No	No	Food and beverages	Medium	2	2	6	152	21.7143	10.8571	34	Male	Single	0	Graduate	Manufacturing technician	white collar	1750	1.86766	Yes	Yes	1167.3	81.8	1.78	25.8174	Overweight	94.7	No	No	120	80	No	No	No	No	No	No
645	6	No	Yes	Food and beverages	Medium	2	2	6	41	6.83333	3.41667	29	Female	Single	0	Graduate	Manufacturing technician	white collar	1700	1.8143	Yes	No	1038	53.3	1.54	22.4743	Normal weight	71.1	No	No	90	60	No	No	No	No	No	No	78	235	62	78	No	No	No	0.458658	0.13053
646	6	No	No	Food and beverages	Medium	2	2	6	41	6.83333	3.41667	30	Female	Single	0	Post graduate	Plant manager	white collar	1908	2.03629	Yes	No	0	64.1	1.62	24.3903	Normal weight	79.7	No	No	100	70	No	No	No	No	No	No
647	6	No	Yes	Food and beverages	Medium	2	2	6	41	6.83333	3.41667	32	Female	Married	0	Graduate	Plant manager	blue collar	1908	2.03629	Yes	No	2878	84.2	1.64	31.3058	Obesity I	96	No	No	110	80	No	No	No	No	No	No	87	152	140	50	No	No	No	0.810908	0.196435
648	6	No	No	Food and beverages	Medium	2	2	6	41	6.83333	3.41667	36	Female	Married	0	High-school	Machine operator	blue collar	954	1.01814	No	No	1680	65.7	1.53	28.0661	Overweight	85.3	No	No	110	70	No	No	No	No	No	No
649	6	No	Yes	Food and beverages	Medium	2	2	6	41	6.83333	3.41667	27	Female	Single	0	Graduate	Plant manager	white collar	954	1.01814	Yes	No	600	53.5	1.6	20.8984	Normal weight	72.4	No	No	110	70	No	No	No	No	No	No	74	152	87	54	No	No	No	0.517723	0.156248
650	6	No	Yes	Food and beverages	Medium	2	2	6	41	6.83333	3.41667	23	Female	Married	1	High-school	Machine operator	blue collar	1085	1.15795	No	No	1017	43.9	1.55	18.2726	Underweight	64	No	No	90	60	No	No	No	No	No	No	77	206	77	74	No	No	No	0.236897	0.131045
651	6	No	Yes	Food and beverages	Medium	2	2	6	41	6.83333	3.41667	29	Female	Single	0	Post graduate	Administrative assistant	white collar	1600	1.70758	Yes	No	1158	47.2	1.65	17.337	Underweight	70.5	No	No			No	No	No	No	No	No	75	160	75	60	No	No	No		1.3e-05
652	6	No	Yes	Food and beverages	Medium	2	2	6	41	6.83333	3.41667	40	Female	Married	1	Middle school	Food processing worker	blue collar	954	1.01814	No	No	1080	76.4	1.54	32.2145	Obesity I	94.6	No	No			No	No	No	No	No	No	89	188	91	54	No	No	No		4e-05
701	7	No	Yes	Textile	Medium	8	1.2	6	122	6.65454	5.54545	45	Female	Married	1	High-school	Manufacturing technician	white collar	1150	1.22732	Yes	No	6960	61.6	1.55	25.64	Overweight	83.1	No	No	100	60	No	No	No	No	No	No	77	214	86	44	No	No	No	2.26586	0.801991
702	7	No	Yes	Textile	Medium	8	1.2	6	122	6.65454	5.54545	53	Female	Married	1	Middle school	Production worker	blue collar	937	1	No	No	5280	82.4	1.53	35.2001	Obesity I	104.1	No	No	120	80	No	No	No	No	No	No	80	246	227	38	Yes	Yes	Yes	7.02918	2.72586
703	7	No	Yes	Textile	Medium	8	1.2	6	122	6.65454	5.54545	62	Female	Divorced	3	High-school	Production worker	blue collar	937	1	No	No	3840	52.5	1.44	25.3183	Overweight	89.6	No	No	140	80	No	No	Yes	Yes	Yes	No	131	224	118	56	Yes	Yes	Yes	10.3324	5.14847
705	7	No	Yes	Textile	Medium	8	1.2	6	122	6.65454	5.54545	59	Female	Married	2	Elementary school	Production worker	blue collar	1908	2.03629	No	No	885	68.5	1.57	27.7902	Overweight	89.9	Yes	Yes	120	80	No	No	Yes	Yes	No	No	90	162	139	42	Yes	Yes	Yes	6.80328	3.59229
707	7	No	Yes	Textile	Medium	8	1.2	6	122	6.65454	5.54545	52	Female	Married	4	Elementary school	Production worker	blue collar	937	1	No	No	960	56.8	1.5	25.2444	Overweight	82.4	No	No	120	70	No	No	No	No	No	No	88	181	59	60	No	No	No	3.42145	1.05385
708	7	No	Yes	Textile	Medium	8	1.2	6	122	6.65454	5.54545	52	Female	Married	0	Middle school	Production worker	blue collar	937	1	No	No	2100	55.7	1.58	22.3121	Normal weight	80.8	No	No	100	60	No	No	No	No	No	No	76	148	81	50	No	No	No	1.85956	0.70869
709	7	No	Yes	Textile	Medium	8	1.2	6	122	6.65454	5.54545	49	Female	Single	0	Elementary school	Production worker	blue collar	937	1	No	No	720	62.9	1.57	25.5183	Overweight	81.3	No	No	150	100	No	No	No	No	No	No	81	195	69	46	Yes	Yes	No	7.14699	1.88241
712	7	No	Yes	Textile	Medium	8	1.2	6	8	9.6	8	29	Male	Single	0	Elementary school	Manufacturing technician	white collar	937	1	No	No	1280	101.9	1.75	33.2735	Obesity I	109.9	No	No	120	80	No	No	No	No	No	No	93	153	280	28	Yes	Yes	Yes	1.78564	0.285434
714	7	No	Yes	Textile	Medium	8	1.2	6	122	6.65454	5.54545	51	Female	Single	1	Elementary school	Production worker	blue collar	937	1	No	No	1979	52.2	1.57	21.1773	Normal weight	73	No	No	120	80	No	No	No	No	No	No	80	198	74	82	No	No	No	2.92894	0.734637
716	7	No	Yes	Textile	Medium	8	1.2	6	122	6.65454	5.54545	48	Female	Married	0	Elementary school	Production worker	blue collar	937	1	No	No	1880	56.4	1.44	27.1991	Overweight	81	No	No	110	60	No	No	No	No	No	No	83	197	64	44	No	No	No	3.08697	1.02981
717	7	No	Yes	Textile	Medium	8	1.2	6	122	6.65454	5.54545	37	Female	Married	1	Middle school	Production worker	blue collar	937	1	No	No	3120	54.8	1.52	23.7188	Normal weight	71	No	No	100	70	No	No	No	No	No	No	87	138	40	52	No	No	No	0.756518	0.14759
723	7	No	Yes	Textile	Medium	8	1.2	6	122	6.65454	5.54545	50	Female	Married	1	Middle school	Production worker	blue collar	937	1	No	No	1920	80.5	1.54	33.9433	Obesity I	101.4	Yes	Yes	110	70	No	No	Yes	No	No	No	86	230	109	36	Yes	Yes	Yes	6.18752	2.52528
725	7	No	Yes	Textile	Medium	8	1.2	6	122	6.65454	5.54545	45	Female	Married	0	Middle school	Production worker	blue collar	937	1	No	No	1830	57.8	1.58	23.1533	Normal weight	82	No	No	100	60	No	No	No	No	No	No	80	240	86	84	No	No	No	1.6515	0.348638
727	7	No	No	Textile	Medium	8	1.2	6	122	6.65454	5.54545	60	Female	Widower	5	Elementary school	Production worker	blue collar	3339	3.5635	No	No	1740	59.5	1.46	27.9133	Overweight	90.1	No	No	100	70	No	No	No	No	No	No
728	7	No	Yes	Textile	Medium	8	1.2	6	122	6.65454	5.54545	49	Female	Married	2	Middle school	Production worker	blue collar	937	1	No	No	1615	49.3	1.45	23.4483	Normal weight	76	No	No	120	80	No	No	No	No	No	No	82	204	95	60	No	No	No	3.44249	0.917064
729	7	No	Yes	Textile	Medium	8	1.2	6	122	6.65454	5.54545	48	Female	Single	0	Elementary school	Production worker	blue collar	937	1	No	No	4020	63.8	1.62	24.3103	Normal weight	85.5	No	No	130	80	No	No	No	No	No	No	73	204	79	42	Yes	Yes	No	5.22072	1.5997
732	7	No	No	Textile	Medium	8	1.2	6	122	6.65454	5.54545	43	Female	Widower	2	Middle school	Production worker	blue collar	937	1	No	No	1845	53.4	1.43	26.1137	Overweight	86.5	No	No	100	70	No	No	No	No	No	No
734	7	No	Yes	Textile	Medium	8	1.2	6	122	6.65454	5.54545	59	Female	Married	3	Middle school	Production worker	blue collar	937	1	No	No	2810	66.3	1.59	26.2252	Overweight	91.3	No	No	100	60	No	No	Yes	No	No	No	94	342	63	62	No	No	No	5.78071	2.64385
735	7	No	Yes	Textile	Medium	8	1.2	6	122	6.65454	5.54545	61	Female	Divorced	2	Middle school	Production worker	blue collar	937	1	No	No	3226.5	89.5	1.45	42.5684	Obesity III	119.1	Yes	Yes	170	80	No	No	Yes	Yes	No	No	106	162	147	42	Yes	Yes	Yes	18.415	8.66517
736	7	No	Yes	Textile	Medium	8	1.2	6	122	6.65454	5.54545	51	Female	Married	2	Elementary school	Production worker	blue collar	937	1	No	No	1320	74.2	1.53	31.6972	Obesity I	102.3	Yes	Yes	140	90	No	No	No	No	No	No	80	182	102	42	Yes	Yes	Yes	8.53896	2.66788
737	7	No	Yes	Textile	Medium	8	1.2	6	122	6.65454	5.54545	40	Female	Single	0	Middle school	Production worker	blue collar	937	1	No	No	1927.5	69.4	1.55	28.8866	Overweight	89.5	No	No	130	80	No	No	No	No	No	No	77	159	79	38	Yes	Yes	No	2.74672	0.765886
738	7	No	No	Textile	Medium	8	1.2	6	122	6.65454	5.54545	55	Female	Married	1	Middle school	Production worker	blue collar	937	1	No	No	0	59.8	1.51	26.2269	Overweight	92	No	No	120	70	No	No	No	No	No	No
739	7	No	Yes	Textile	Medium	8	1.2	6	122	6.65454	5.54545	47	Female	Married	2	Elementary school	Production worker	blue collar	937	1	No	No	1137	80.9	1.43	39.5618	Obesity I	112.5	No	No	120	80	No	No	Yes	No	No	No	91	190	162	40	Yes	Yes	Yes	3.81323	1.23368
801	8	No	Yes	Textile	Small	7	4.5	18	28	10.5	2.33333	42	Male	Married	1	Elementary school	Administrative assistant	white collar	937	1	No	No	240	97.3	1.73	32.5103	Obesity I	112.8	Yes	Yes	130	70	Yes	No	Yes	Yes	Yes	No	83	180	118	46	No	No	Yes	11.3704	0.00375
807	8	No	Yes	Textile	Small	7	4.5	18	28	10.5	2.33333	28	Male	Single	0	Graduate	Administrative assistant	white collar	1419	1.51441	Yes	No	2400	105.6	1.7	36.5398	Obesity I	98.5	No	No	120	70	No	No	No	No	No	No	80	161	58	52	No	No	No	0.957413	0.076699
809	8	No	Yes	Textile	Small	7	4.5	18	27	9.34615	2.07692	42	Female	Single	3	High-school	Production worker	blue collar	937	1	No	No	1920	86.1	1.66	31.2455	Obesity I	95	No	No	100	70	No	No	No	No	No	No	79	236	70	56	No	No	No	1.83485	0.53533
812	8	No	Yes	Textile	Small	7	4.5	18	28	10.5	2.33333	65	Male	Married	4	High-school	Administrative assistant	white collar	2700	2.88154	Yes	No	1950	60.8	1.67	21.8007	Normal weight	79.3	No	No	110	80	No	No	Yes	No	No	No	109	237	104	58	No	No	No	13.8744	10.2237
813	8	No	Yes	Textile	Small	7	4.5	18	27	9.34615	2.07692	59	Female	Single	0	High-school	Administrative assistant	white collar	2900	3.09498	Yes	No	480	71.2	1.54	30.0219	Obesity I	99.7	No	No	125	80	No	No	Yes	No	Yes	No	78	254	342	40	Yes	Yes	Yes	9.96538	4.36144
814	8	No	No	Textile	Small	7	4.5	18	27	9.34615	2.07692	22	Female	Single	0	High-school	Administrative assistant	white collar	1100	1.17396	Yes	No	1480	54.1	1.59	21.3995	Normal weight	66.8	No	No	120	80	No	No	No	No	No	No
816	8	No	Yes	Textile	Small	7	4.5	18	28	10.5	2.33333	52	Male	Single	2	Middle school	Plant manager	white collar	5000	5.33618	Yes	No	600	86	1.65	31.5886	Obesity I	107	No	No	140	100	No	No	No	No	No	No	96	296	99	52	No	No	No	15.7099	7.84879
818	8	No	Yes	Textile	Small	7	4.5	18	27	9.34615	2.07692	25	Female	Married	1	High-school	Production worker	blue collar	850	0.907151	No	No	478	59.6	1.64	22.1594	Normal weight	77.7	No	No	120	60	No	No	No	No	No	No	75	122	113	38	No	No	No	0.541025	0.310804
821	8	No	Yes	Textile	Small	7	4.5	18	28	10.5	2.33333	36	Male	Married	5	Middle school	Plant manager	white collar	1000	1.06724	No	No	0	91.8	1.7	31.7647	Obesity I	107.6	No	No	110	80	Yes	Yes	Yes	No	Yes	No	97	196	250	36	Yes	Yes	Yes	5.32719	0.002534
822	8	No	No	Textile	Small	7	4.5	18	27	9.34615	2.07692	24	Female	Single	1	High-school	Production worker	blue collar	937	1	No	No	2424	70.2	1.5	31.2	Obesity I	92.3	No	No	120	80	No	No	No	No	No	No
823	8	No	Yes	Textile	Small	7	4.5	18	27	9.34615	2.07692	39	Female	Single	2	High-school	Production worker	blue collar	937	1	No	No	2232	59.3	1.55	24.6826	Normal weight	77.5	No	No	140	100	No	No	No	No	No	No	71	210	50	82	No	No	No	2.58184	0.319297
827	8	No	Yes	Textile	Small	7	4.5	18	27	9.34615	2.07692	38	Female	Married	2	High-school	Production worker	blue collar	937	1	No	No	2160	67.7	1.58	27.1191	Overweight	84.6	No	No	110	80	No	No	No	No	No	No	73	182	57	40	No	No	No	1.75364	0.614043
829	8	No	Yes	Textile	Small	7	4.5	18	28	10.5	2.33333	34	Male	Married	2	High-school	Plant manager	white collar	2099	2.24013	No	Yes	0	99.5	1.7	34.4291	Obesity I	111.9	Yes	Yes	140	110	No	No	Yes	No	No	No	77	241	129	38	Yes	Yes	Yes	12.3518	100
834	8	No	Yes	Textile	Small	7	4.5	18	27	9.34615	2.07692	31	Female	Married	0	Graduate	Production worker	blue collar	937	1	No	Yes	600	52.3	1.56	21.4908	Normal weight	70	No	No	110	70	No	No	No	No	No	No	73	222	98	66	No	No	No	1.65246	1.67218
840	8	No	Yes	Textile	Small	7	4.5	18	27	9.34615	2.07692	22	Female	Single	0	High-school	Production worker	blue collar	937	1	No	No	1800	61.1	1.58	24.4752	Normal weight	73.2	No	No	100	70	No	No	No	No	No	No	67	145	52	62	No	No	No	0.211869	0.089605
841	8	No	Yes	Textile	Small	7	4.5	18	27	9.34615	2.07692	25	Female	Single	2	High-school	Production worker	blue collar	937	1	No	No	8394	54.7	1.46	25.6615	Overweight	83	No	No	100	70	No	No	No	No	No	No	68	193	156	40	Yes	Yes	No	0.549027	0.912029
844	8	No	Yes	Textile	Small	7	4.5	18	28	10.5	2.33333	39	Male	Married	1	Middle school	Machine operator	blue collar	937	1	Yes	Yes	6438	64.5	1.63	24.2764	Normal weight	83.3	No	No	100	70	No	No	No	No	No	No	89	155	39	54	No	No	No	3.26505	99.9773
845	8	No	Yes	Textile	Small	7	4.5	18	27	9.34615	2.07692	44	Female	Married	1	High-school	Administrative assistant	white collar	1431	1.52721	Yes	No	1380.3	69.2	1.57	28.0742	Overweight	90.6	No	No	140	80	No	No	No	No	No	No	81	163	89	44	Yes	Yes	Yes	3.88594	0.907992
846	8	No	Yes	Textile	Small	7	4.5	18	28	10.5	2.33333	32	Male	Single	0	High-school	Machine operator	blue collar	937	1	No	Yes	2520	73.5	1.7	25.4325	Overweight	86.4	No	No	110	70	No	No	No	No	No	No	92	243	184	76	No	No	No	2.59069	99.4748
847	8	No	Yes	Textile	Small	7	4.5	18	28	10.5	2.33333	32	Male	Single	0	High-school	Production worker	blue collar	937	1	No	Yes	594	73.7	1.66	26.7455	Overweight	89.2	No	No	120	80	No	No	No	No	No	No	76	249	174	38	No	No	No	5.9107	100
848	8	No	Yes	Textile	Small	7	4.5	18	28	10.5	2.33333	23	Male	Single	0	High-school	Machine operator	blue collar	1431	1.52721	No	No	2447.5	71.1	1.69	24.8941	Normal weight	75.5	No	No	130	70	No	No	No	No	No	No	76	142	30	48	No	No	No	0.573791	0.022133
849	8	No	Yes	Textile	Small	7	4.5	18	28	10.5	2.33333	26	Male	Married	1	High-school	Manufacturing technician	white collar	1600	1.70758	No	No	180	92.2	1.83	27.5314	Overweight	93	No	No	140	90	No	No	No	No	No	No	71	178	61	64	No	No	No	0.948183	0.056745
850	8	No	Yes	Textile	Small	7	4.5	18	27	9.34615	2.07692	26	Female	Married	0	High-school	Production worker	blue collar	937	1	Yes	No	1600	45.8	1.65	16.8228	Underweight	62	No	No	100	70	No	No	No	No	No	No	73	231	94	60	No	No	No	0.560889	0.390608
851	8	No	Yes	Textile	Small	7	4.5	18	27	9.34615	2.07692	44	Female	Single	3	High-school	Production worker	blue collar	937	1	No	No	2820	90.5	1.62	34.4841	Obesity I	109.5	No	No	130	70	No	No	No	No	No	No	94	238	113	66	No	No	No	3.75774	0.778864
852	8	No	No	Textile	Small	7	4.5	18	28	10.5	2.33333	49	Male	Married	2	High-school	Production worker	blue collar	1673	1.78549	Yes	Yes	120	69.9	1.67	25.0636	Overweight	84.7	No	No	130	90	No	No	No	No	No	No
1002	10	Yes	Yes	Textile	Medium	17	2	8	62	20.6667	10.3333	57	Male	Widower	2	High-school	Manufacturing technician	white collar	2200	2.34792	Yes	Yes	240	83.4	1.7	28.8581	Overweight	102.8	Yes	Yes	110	60	No	No	No	No	No	No	71	197	103	38	Yes	Yes	Yes	27.0699	100
1003	10	Yes	No	Textile	Medium	17	2	8	62	20.6667	10.3333	42	Male	Married	2	High-school	Manufacturing technician	white collar	1908	2.03629	Yes	No	1582	65.5	1.69	22.9334	Normal weight	75.9	No	No	110	70	No	No	No	No	No	No
1004	10	Yes	Yes	Textile	Medium	17	2	8	62	20.6667	10.3333	57	Male	Married	5	Elementary school	Machine operator	white collar	937	1	No	No	756	86.6	1.62	32.998	Obesity I	109	No	No	130	80	No	No	No	No	No	No	105	201	360	30	Yes	Yes	Yes	19.1099	10.3923
1005	10	Yes	No	Textile	Medium	17	2	8	51	6.8	3.4	41	Female	Single	0	Graduate	Manufacturing technician	white collar	937	1	No	No	3600	53.8	1.63	20.2492	Normal weight	72.7	No	No	100	70	No	No	No	No	No	No
1006	10	Yes	Yes	Textile	Medium	17	2	8	51	6.8	3.4	40	Female	Married	2	Middle school	Production worker	blue collar	937	1	No	No	3720	71.3	1.55	29.6774	Overweight	98.1	No	No	120	70	No	No	No	No	No	No	81	186	363	44	Yes	Yes	Yes	2.40344	0.678041
1007	10	Yes	Yes	Textile	Medium	17	2	8	51	6.8	3.4	36	Female	Married	2	High-school	Manufacturing technician	white collar	1400	1.49413	No	No	1840	86.8	1.69	30.3911	Obesity I	98	No	No	120	80	No	No	No	No	No	No	76	196	71	38	No	No	No	2.22465	0.930079
1009	10	Yes	Yes	Textile	Medium	17	2	8	51	6.8	3.4	54	Female	Married	5	High-school	Food processing worker	blue collar	1431	1.52721	No	Yes	3925.5	89.7	1.55	37.3361	Obesity I	107.5	Yes	Yes	120	80	Yes	No	No	No	No	No	76	166	86	48	Yes	Yes	Yes	15.7509	9.42653
1010	10	Yes	Yes	Textile	Medium	17	2	8	51	6.8	3.4	34	Female	Married	1	High-school	Manufacturing technician	white collar	1400	1.49413	No	No	2400	74	1.58	29.6427	Overweight	95.2	No	No	120	80	No	No	Yes	No	Yes	No	78	244	145	54	No	No	No	1.98112	0.68611
1011	10	Yes	Yes	Textile	Medium	17	2	8	51	6.8	3.4	28	Female	Married	1	High-school	Production worker	blue collar	1431	1.52721	No	No	1087.5	61.2	1.53	26.1438	Overweight	90.7	No	No	110	70	No	No	No	No	No	No	68	109	110	32	No	No	No	0.545979	0.268942
1014	10	Yes	Yes	Textile	Medium	17	2	8	51	6.8	3.4	41	Female	Married	0	Graduate	Production worker	blue collar	1431	1.52721	No	No	1840	52.7	1.45	25.0654	Overweight	77	No	No	100	70	No	No	No	No	No	No	104	205	120	48	No	No	No	1.63361	0.513284
1017	10	Yes	Yes	Textile	Medium	17	2	8	62	20.6667	10.3333	46	Male	Single	3	Middle school	Manufacturing technician	white collar	1600	1.70758	No	No	3706	90.1	1.67	32.3066	Obesity I	103.4	No	No	130	90	No	No	Yes	No	No	No	80	183	99	40	No	No	No	7.29134	2.63606
1018	10	Yes	Yes	Textile	Medium	17	2	8	51	6.8	3.4	42	Female	Divorced	1	High-school	Production worker	blue collar	1200	1.28068	No	No	3690	97.6	1.58	39.0963	Obesity I	103.3	Yes	No	150	100	No	No	No	No	No	No	85	167	106	46	Yes	Yes	Yes	4.20275	0.873878
1019	10	Yes	No	Textile	Medium	17	2	8	51	6.8	3.4	34	Female	Married	1	High-school	Production worker	blue collar	937	1	No	No	1320	60.9	1.53	26.0156	Overweight	82.5	No	No	110	70	No	No	No	No	No	No
1020	10	Yes	Yes	Textile	Medium	17	2	8	51	6.8	3.4	31	Female	Married	0	High-school	Manufacturing technician	white collar	1412	1.50694	No	No	3247.5	61	1.52	26.4024	Overweight	80.8	No	No	110	70	No	No	No	No	No	No	79	197	207	52	No	No	No	1.00125	0.361783
1022	10	Yes	Yes	Textile	Medium	17	2	8	51	6.8	3.4	49	Female	Single	1	Middle school	Production worker	blue collar	937	1	No	No	967.5	59.7	1.49	26.8907	Overweight	83.7	Yes	Yes	120	90	No	No	Yes	No	Yes	No	63	175	172	38	Yes	Yes	Yes	5.2452	1.80762
1024	10	Yes	Yes	Textile	Medium	17	2	8	51	6.8	3.4	44	Female	Single	3	High-school	Production worker	blue collar	937	1	No	No	2040	72.5	1.54	30.5701	Obesity I	97.6	No	No	120	80	No	No	No	No	No	No	80	165	150	48	Yes	Yes	Yes	2.4405	0.594653
1025	10	Yes	Yes	Textile	Medium	17	2	8	51	6.8	3.4	40	Female	Married	0	High-school	Production worker	blue collar	937	1	No	No	4240	62.3	1.56	25.5999	Overweight	87.7	No	No	110	70	No	No	No	No	No	No	81	211	112	38	No	No	No	2.4418	0.986196
1029	10	Yes	Yes	Textile	Medium	17	2	8	62	20.6667	10.3333	35	Male	Married	1	High-school	Manufacturing technician	white collar	1500	1.60085	Yes	No	2430	67.7	1.66	24.5682	Normal weight	85.3	No	No	100	70	No	No	No	No	No	No	70	192	133	46	No	No	No	1.81306	0.379236
1030	10	Yes	Yes	Textile	Medium	17	2	8	62	20.6667	10.3333	50	Male	Married	2	High-school	Manufacturing technician	white collar	1750	1.86766	No	No	2034	85.9	1.73	28.7013	Overweight	107	No	No	110	80	No	No	No	No	No	No	81	201	130	40	No	No	No	7.56096	3.39133
1031	10	Yes	Yes	Textile	Medium	17	2	8	51	6.8	3.4	41	Female	Single	0	High-school	Production worker	blue collar	937	1	No	No	1410	62.6	1.6	24.4531	Normal weight	85.3	No	No	120	80	No	No	No	No	No	No	77	124	54	38	No	No	No	1.73573	0.421935
1032	10	Yes	Yes	Textile	Medium	17	2	8	51	6.8	3.4	34	Female	Married	1	High-school	Production worker	blue collar	937	1	No	No	3600	59.6	1.52	25.7964	Overweight	89.6	No	No	90	60	No	No	No	No	No	No	73	159	129	52	No	No	No	0.551771	0.143771
1102	11	Yes	Yes	Textile	Small	16	1.33333	4	43	7.16667	5.375	41	Male	Married	2	High-school	Production worker	blue collar	1000	1.06724	No	No	1188	63	1.58	25.2363	Overweight	82.8	No	No	120	80	No	No	No	No	No	No	74	157	92	44	No	No	No	3.45125	0.841187
1104	11	Yes	Yes	Textile	Small	16	1.33333	4	19	2.30303	1.72727	38	Female	Married	1	High-school	Production worker	blue collar	937	1	No	No	888	78.9	1.56	32.4211	Obesity I	98.4	No	No	120	80	No	No	No	No	No	No	81	148	94	46	No	No	No	1.57439	0.342892
1105	11	Yes	Yes	Textile	Small	16	1.33333	4	43	7.16667	5.375	26	Male	Married	2	High-school	Food processing worker	blue collar	1200	1.28068	No	No	1440	88.1	1.69	30.8463	Obesity I	101.4	No	No	110	70	No	No	No	No	No	No	92	192	168	38	Yes	Yes	No	1.05269	0.150442
1108	11	Yes	Yes	Textile	Small	16	1.33333	4	19	2.30303	1.72727	36	Female	Married	0	High-school	Production worker	blue collar	937	1	No	No	840	63.5	1.55	26.4308	Overweight	88.7	No	No	110	80	No	No	Yes	Yes	No	No	80	193	96	48	No	No	No	1.46092	0.443596
1109	11	Yes	Yes	Textile	Small	16	1.33333	4	43	7.16667	5.375	59	Male	Married	3	Middle school	Food processing worker	blue collar	937	1	No	Yes	0	89.7	1.66	32.5519	Obesity I	109.3	Yes	Yes	130	80	No	No	No	No	No	No	85	176	190	32	Yes	Yes	Yes	39.7477	100
1110	11	Yes	Yes	Textile	Small	16	1.33333	4	19	2.30303	1.72727	27	Female	Married	1	High-school	Production worker	blue collar	937	1	No	No	2580	58.6	1.59	23.1795	Normal weight	81.4	No	No	110	60	No	No	No	No	No	No	72	172	119	40	No	No	No	0.742733	0.61056
1111	11	Yes	Yes	Textile	Small	16	1.33333	4	19	2.30303	1.72727	33	Female	Married	1	High-school	Manufacturing technician	white collar	1200	1.28068	No	No	0	55.2	1.53	23.5807	Normal weight	85	No	No	100	60	No	No	No	No	No	No	75	189	119	30	No	No	No	1.24844	1.1028
1113	11	Yes	Yes	Textile	Small	16	1.33333	4	43	7.16667	5.375	52	Male	Married	3	Middle school	Production worker	blue collar	937	1	No	No	1674	72.8	1.71	24.8965	Normal weight	92.8	No	No	120	80	No	No	No	No	No	No	85	167	114	40	No	No	No	8.16446	3.71772
1115	11	Yes	Yes	Textile	Small	16	1.33333	4	19	2.30303	1.72727	48	Female	Married	2	High-school	Manufacturing technician	white collar	1600	1.70758	No	No	3960	68.3	1.53	29.1768	Overweight	92.9	Yes	Yes	140	90	No	No	No	No	No	No	111	192	106	48	Yes	Yes	Yes	7.24608	1.90477
1116	11	Yes	No	Textile	Small	16	1.33333	4	43	7.16667	5.375	42	Male	Married	1	High-school	Manufacturing technician	white collar	3280	3.50053	No	No	1680	84	1.71	28.7268	Overweight	98.3	No	No	150	100	No	No	No	No	No	No
1119	11	Yes	Yes	Textile	Small	16	1.33333	4	43	7.16667	5.375	47	Male	Married	2	High-school	Machine operator	blue collar	1124	1.19957	No	No	600	88	1.55	36.6285	Obesity I	110.2	No	No	120	80	Yes	Yes	No	No	No	No	108	217	188	52	Yes	Yes	Yes	11.003	0.004788
1121	11	Yes	Yes	Textile	Small	16	1.33333	4	43	7.16667	5.375	50	Male	Married	4	High-school	Manufacturing technician	white collar	1968	2.10032	No	No	1616	68.7	1.6	26.8359	Overweight	90	No	No			No	No	No	No	No	No	73	199	141	42	No	No	No		0.000809
1122	11	Yes	Yes	Textile	Small	16	1.33333	4	43	7.16667	5.375	41	Male	Married	2	High-school	Food processing worker	blue collar	937	1	No	No	645	70.3	1.58	28.1606	Overweight	94.5	No	No	120	80	No	No	No	No	No	No	68	161	89	54	No	No	No	2.94065	0.661217
1123	11	Yes	Yes	Textile	Small	16	1.33333	4	19	2.30303	1.72727	44	Female	Single	0	High-school	Production worker	blue collar	937	1	No	No	3714	52.2	1.52	22.5935	Normal weight	70.6	No	No	120	80	No	No	No	No	No	No	68	138	94	62	No	No	No	1.64692	0.284431
1125	11	Yes	No	Textile	Small	16	1.33333	4	19	2.30303	1.72727	40	Female	Single	1	Elementary school	Production worker	blue collar	937	1	No	No	396	77.4	1.53	33.0642	Obesity I	98.7	No	No	120	80	Yes	Yes	No	No	No	No
1127	11	Yes	Yes	Textile	Small	16	1.33333	4	19	2.30303	1.72727	33	Female	Single	1	High-school	Administrative assistant	white collar	937	1	No	Yes	5160	69.6	1.54	29.3473	Overweight	89.9	No	No	100	80	No	No	No	No	No	No	74	145	129	42	No	No	No	1.21175	1.32626
1129	11	Yes	Yes	Textile	Small	16	1.33333	4	19	2.30303	1.72727	61	Female	Divorced	6	Middle school	Production worker	blue collar	937	1	No	No	2415	64.8	1.5	28.8	Overweight	94.3	No	No	130	100	No	No	No	No	No	No	97	281	666	34	Yes	Yes	Yes	14.8096	6.4765
1130	11	Yes	Yes	Textile	Small	16	1.33333	4	19	2.30303	1.72727	55	Female	Married	2	Middle school	Production worker	blue collar	937	1	No	Yes	1962.5	54.4	1.5	24.1778	Normal weight	82	Yes	Yes	130	90	No	No	No	No	No	No	85	160	101	50	No	No	No	10.4875	5.79041
1131	11	Yes	Yes	Textile	Small	16	1.33333	4	19	2.30303	1.72727	42	Female	Married	3	High-school	Production worker	blue collar	937	1	No	No	2250	58.5	1.49	26.3502	Overweight	83.8	No	No	110	70	No	No	No	No	No	No	82	198	161	50	No	No	No	2.08941	0.567035
1202	12	Yes	Yes	Food and beverages	Medium	11	1.75	7	116	10.15	5.8	40	Male	Married	4	Middle school	Production worker	blue collar	937	1	No	No	1800	85.7	1.69	30.006	Obesity I	97.8	No	No	110	80	No	No	No	No	No	No	83	148	249	24	Yes	Yes	No	4.43198	1.3519
1204	12	Yes	Yes	Food and beverages	Medium	11	1.75	7	116	10.15	5.8	34	Male	Married	2	High-school	Plant manager	white collar	1500	1.60085	No	No	1680	94	1.8	29.0123	Overweight	99.8	No	No	110	60	No	No	No	No	No	No	80	179	126	36	No	No	No	2.31129	0.499979
1206	12	Yes	Yes	Food and beverages	Medium	11	1.75	7	34	7.4375	4.25	29	Female	Married	0	Graduate	Administrative assistant	white collar	1405	1.49947	No	No	5831	54.5	1.48	24.8813	Normal weight	75	No	No	100	60	No	No	Yes	No	No	No	75	251	108	54	No	No	No	0.860361	0.584322
1207	12	Yes	Yes	Food and beverages	Medium	11	1.75	7	116	10.15	5.8	34	Male	Married	1	High-school	Plant manager	white collar	1400	1.49413	Yes	No	0	72.8	1.64	27.0672	Overweight	92.5	No	No	120	80	No	No	No	No	No	No	84	188	256	40	No	No	No	2.61513	0.546678
1210	12	Yes	No	Food and beverages	Medium	11	1.75	7	34	7.4375	4.25	26	Female	Single	0	High-school	Administrative assistant	white collar	1200	1.28068	No	No	2430	79.4	1.62	30.2545	Obesity I	94.8	No	No	120	80	No	No	No	No	No	No
1211	12	Yes	No	Food and beverages	Medium	11	1.75	7	34	7.4375	4.25	35	Female	Married	0	High-school	Production worker	blue collar	937	1	No	No	1080	61.5	1.54	25.9319	Overweight	86.4	No	No	120	80	No	No	No	No	No	No
1214	12	Yes	Yes	Food and beverages	Medium	11	1.75	7	34	7.4375	4.25	31	Female	Single	0	Post graduate	Plant manager	white collar	4685	5	Yes	No	1080	82.8	1.56	34.0237	Obesity I	90.3	No	No	110	70	No	No	No	No	No	No	79	146	69	42	No	No	No	0.811609	0.278395
1215	12	Yes	Yes	Food and beverages	Medium	11	1.75	7	34	7.4375	4.25	53	Female	Married	3	High-school	Administrative assistant	white collar	1405	1.49947	No	No	3600	62	1.62	23.6244	Normal weight	82.6	No	No	110	60	No	No	Yes	No	No	No	84	198	158	46	Yes	Yes	No	3.77742	1.45948
1216	12	Yes	Yes	Food and beverages	Medium	11	1.75	7	34	7.4375	4.25	43	Female	Single	0	Middle school	Production worker	blue collar	937	1	No	No	3120	34	1.35	18.6557	Normal weight	66.6	No	No	110	80	No	No	No	No	No	No	79	146	69	42	No	No	No	1.73093	0.468447
1217	12	Yes	Yes	Food and beverages	Medium	11	1.75	7	116	10.15	5.8	38	Male	Married	4	High-school	Manufacturing technician	white collar	1405	1.49947	Yes	No	1386	70.9	1.67	25.4222	Overweight	85	No	No	130	100	No	No	No	No	No	No	78	163	77	54	No	No	No	2.76087	0.501309
1218	12	Yes	Yes	Food and beverages	Medium	11	1.75	7	116	10.15	5.8	43	Male	Married	2	Middle school	Machine operator	blue collar	1200	1.28068	Yes	No	1080	84.1	1.66	30.5197	Obesity I	101.6	Yes	No	130	90	No	No	No	No	No	No	90	191	102	45	No	No	No	5.62531	1.74753
1222	12	Yes	Yes	Food and beverages	Medium	11	1.75	7	116	10.15	5.8	43	Male	Married	2	Graduate	Plant manager	white collar	3748	4	No	Yes	480	82.3	1.73	27.4984	Overweight	92.9	No	No	100	60	No	No	No	No	No	No	83	161	154	48	No	No	No	5.07988	100
1224	12	Yes	Yes	Food and beverages	Medium	11	1.75	7	116	10.15	5.8	58	Male	Married	4	High-school	Production worker	blue collar	937	1	Yes	No	678	51.6	1.53	22.0428	Normal weight	73	Yes	Yes	120	90	No	No	No	No	No	No	73	192	104	56	No	No	No	13.0055	6.68741
1228	12	Yes	Yes	Food and beverages	Medium	11	1.75	7	116	10.15	5.8	36	Male	Married	2	Elementary school	Production worker	blue collar	937	1	No	No	3120	56.8	1.65	20.8632	Normal weight	74	No	No	120	80	No	No	No	No	No	No	75	152	65	60	No	No	No	1.68877	0.227481
1229	12	Yes	Yes	Food and beverages	Medium	11	1.75	7	116	10.15	5.8	54	Male	Married	5	Middle school	Machine operator	blue collar	937	1	No	Yes	0	64.7	1.53	27.6389	Overweight	93.5	No	No	150	80	No	No	No	No	No	No	98	172	118	34	No	No	No	28.867	100
1232	12	Yes	No	Food and beverages	Medium	11	1.75	7	116	10.15	5.8	52	Male	Single	7	High-school	Plant manager	white collar	1030	1.09925	No	Yes	2440	79.3	1.65	29.1276	Overweight	96.1	Yes	No	130	80	No	No	No	No	No	No
1233	12	Yes	Yes	Food and beverages	Medium	11	1.75	7	116	10.15	5.8	31	Male	Married	0	Graduate	Plant manager	white collar	3200	3.41515	No	No	0	94.2	1.67	33.7768	Obesity I	106.5	No	No	130	90	No	No	No	No	No	No	91	179	116	42	No	No	No	2.08619	0.319133
1234	12	Yes	No	Food and beverages	Medium	11	1.75	7	116	10.15	5.8	40	Male	Married	2	Elementary school	Production worker	blue collar	1370	1.46211	No	No	1794	84.1	1.73	28.0998	Overweight	90.4	Yes	No	120	80	No	No	No	No	No	No
1236	12	Yes	No	Food and beverages	Medium	11	1.75	7	116	10.15	5.8	51	Male	Married	6	Middle school	Machine operator	blue collar	937	1	No	No	200	55.1	1.58	22.0718	Normal weight	72.3	No	No	150	100	No	No	No	No	No	No
1237	12	Yes	Yes	Food and beverages	Medium	11	1.75	7	116	10.15	5.8	38	Male	Married	3	High-school	Machine operator	blue collar	1151	1.22839	No	No	620	87.4	1.64	32.4955	Obesity I	105.3	No	No	120	80	No	No	No	No	No	No	79	226	186	30	Yes	Yes	Yes	5.81464	2.18258
1242	12	Yes	Yes	Food and beverages	Medium	11	1.75	7	116	10.15	5.8	26	Male	Single	0	Middle school	Machine operator	blue collar	1326	1.41515	No	No	360	98.4	1.67	35.2827	Obesity I	112.6	Yes	Yes	150	100	No	No	No	No	No	No	71	170	195	40	Yes	Yes	Yes	2.20353	0.185948
1243	12	Yes	Yes	Food and beverages	Medium	11	1.75	7	116	10.15	5.8	29	Male	Married	1	Middle school	Machine operator	blue collar	937	1	No	No	1680	90.9	1.75	29.6816	Overweight	97.1	No	No	110	70	No	No	No	No	No	No	82	159	98	42	No	No	No	1.08351	0.120039
1244	12	Yes	Yes	Food and beverages	Medium	11	1.75	7	116	10.15	5.8	42	Male	Married	3	High-school	Plant manager	white collar	3000	3.20171	No	No	720	63.4	1.57	25.7211	Overweight	91.7	No	No	120	70	No	No	No	No	No	No	87	209	106	34	No	No	No	6.41713	2.34274
1248	12	Yes	Yes	Food and beverages	Medium	11	1.75	7	116	10.15	5.8	37	Male	Married	1	High-school	Machine operator	blue collar	1070	1.14194	No	No	1200	60.7	1.54	25.5945	Overweight	86	No	No	110	60	No	No	No	No	No	No	107	122	162	36	Yes	No	No	1.94976	0.3207
1250	12	Yes	No	Food and beverages	Medium	11	1.75	7	34	7.4375	4.25	35	Female	Married	2	Graduate	Administrative assistant	white collar	1600	1.70758	Yes	No	3600	59.1	1.57	23.9766	Normal weight	76.9	No	No	90	50	No	No	No	No	No	No
1251	12	Yes	No	Food and beverages	Medium	11	1.75	7	116	10.15	5.8	32	Male	Married	0	High-school	Manufacturing technician	white collar	1405	1.49947	No	No	840	77.8	1.68	27.5652	Overweight	96.3	No	No	110	70	No	No	No	No	No	No
1253	12	Yes	No	Food and beverages	Medium	11	1.75	7	116	10.15	5.8	38	Male	Married	2	High-school	Machine operator	blue collar	1405	1.49947	No	No	792	90.6	1.73	30.2716	Obesity I	104	No	No	120	80	No	No	No	No	No	No
1254	12	Yes	Yes	Food and beverages	Medium	11	1.75	7	34	7.4375	4.25	35	Female	Single	1	Middle school	Production worker	blue collar	937	1	No	No	2130	88.1	1.58	35.2908	Obesity I	108.3	No	No	120	90	No	No	No	No	No	No	98	249	110	68	No	No	No	1.84614	0.419892
1302	13	No	Yes	Textile	Small	7	4.5	18	44	12.375	2.75	47	Female	Married	2	Elementary school	Production worker	blue collar	937	1	No	No	2160	61.2	1.5	27.2	Overweight	88.5	No	No	120	80	No	No	No	No	No	No	76	139	65	38	No	No	No	2.72513	0.820377
1308	13	No	Yes	Textile	Small	7	4.5	18	44	12.375	2.75	31	Female	Married	1	Middle school	Production worker	blue collar	937	1	No	No	2247	81	1.54	34.1542	Obesity I	92.6	No	No	110	70	No	No	Yes	No	No	No	69	198	101	64	No	No	No	0.870191	0.206901
1309	13	No	Yes	Textile	Small	7	4.5	18	16	18	4	27	Male	Single	0	High-school	Production worker	blue collar	937	1	No	No	960	71	1.73	23.7228	Normal weight	84	No	No	140	80	No	No	No	No	No	No	88	213	106	58	No	No	No	1.42396	0.152146
1310	13	No	Yes	Textile	Small	7	4.5	18	44	12.375	2.75	47	Female	Married	1	Graduate	Manufacturing technician	white collar	1200	1.28068	No	No	1440	44	1.54	18.5529	Normal weight	67.8	No	No	130	70	No	No	No	No	No	No	78	196	98	58	No	No	No	3.79623	0.883743
1311	13	No	Yes	Textile	Small	7	4.5	18	44	12.375	2.75	29	Female	Married	0	Middle school	Production worker	blue collar	937	1	No	No	840	43	1.52	18.6115	Normal weight	66.3	No	No	110	70	No	No	No	No	No	No	68	238	172	50	No	No	No	1.10713	0.751906
1312	13	No	Yes	Textile	Small	7	4.5	18	44	12.375	2.75	57	Female	Single	1	Middle school	Production worker	blue collar	937	1	No	Yes	3954	81.1	1.54	34.1963	Obesity I	99.3	Yes	Yes	120	90	No	No	Yes	No	No	No	75	233	259	36	Yes	Yes	Yes	17.3829	10.5907
1313	13	No	Yes	Textile	Small	7	4.5	18	44	12.375	2.75	50	Female	Married	3	Middle school	Production worker	blue collar	937	1	No	No	3360	87.4	1.53	37.3361	Obesity I	107.8	Yes	Yes	120	80	No	No	No	No	No	No	81	166	87	60	No	No	No	3.76107	1.02396
1316	13	No	Yes	Textile	Small	7	4.5	18	44	12.375	2.75	41	Female	Married	3	High-school	Production worker	blue collar	937	1	No	Yes	4020	63.5	1.52	27.4844	Overweight	84.9	No	No			No	No	No	No	No	No	74	164	114	52	No	No	No		0.000139
1320	13	No	No	Textile	Small	7	4.5	18	44	12.375	2.75	42	Female	Married	1	High-school	Production worker	blue collar	937	1	No	No	2580	49.9	1.39	25.8268	Overweight	78.2	Yes	No	140	80	No	No	No	No	No	No
1322	13	No	Yes	Textile	Small	7	4.5	18	16	18	4	54	Male	Married	2	High-school	Plant manager	white collar	2000	2.13447	Yes	No	480	64	1.63	24.0882	Normal weight	85.5	No	No	110	90	No	No	No	No	No	No	69	199	74	84	No	No	No	4.80629	2.42598
1324	13	No	Yes	Textile	Small	7	4.5	18	44	12.375	2.75	31	Female	Single	0	High-school	Production worker	blue collar	937	1	No	No	360	67.2	1.54	28.3353	Overweight	84.1	Yes	No	130	90	No	No	Yes	No	No	No	73	169	226	58	Yes	Yes	No	1.21991	0.239924
1325	13	No	Yes	Textile	Small	7	4.5	18	44	12.375	2.75	44	Female	Married	3	Middle school	Production worker	blue collar	937	1	No	No	6720	66.9	1.57	27.1411	Overweight	84.9	No	No	110	70	No	No	No	No	No	No	81	172	130	38	No	No	No	2.38196	0.794588
1328	13	No	Yes	Textile	Small	7	4.5	18	44	12.375	2.75	30	Female	Married	0	High-school	Production worker	blue collar	937	1	No	No	1370	64.8	1.62	24.6914	Normal weight	82.8	No	No	110	70	No	No	No	No	No	No	71	110	68	44	No	No	No	0.517429	0.106385
1330	13	No	Yes	Textile	Small	7	4.5	18	16	18	4	26	Male	Married	1	Middle school	Production worker	blue collar	937	1	No	No	3360	51.5	1.61	19.8681	Normal weight	73.3	No	No	120	80	No	No	No	No	No	No	79	141	79	46	No	No	No	0.737874	0.043055
1331	13	No	Yes	Textile	Small	7	4.5	18	44	12.375	2.75	54	Female	Single	4	Middle school	Production worker	blue collar	937	1	No	No	3210	49.1	1.49	22.1161	Normal weight	84.9	No	Yes	130	70	Yes	Yes	Yes	Yes	Yes	Yes	270	220	183	60	Yes	Yes	No	14.0977	4.87964
1335	13	No	Yes	Textile	Small	7	4.5	18	44	12.375	2.75	47	Female	Single	9	Elementary school	Machine operator	white collar	937	1	No	No	1207.5	71.6	1.52	30.9903	Obesity I	98.6	Yes	Yes			No	No	No	No	No	No	157	254	446	32	Yes	Yes	Yes		0.00023
1336	13	No	Yes	Textile	Small	7	4.5	18	44	12.375	2.75	35	Female	Single	1	High-school	Production worker	blue collar	937	1	No	No	3960	65.8	1.53	28.1088	Overweight	90.6	No	No	140	90	No	No	No	No	No	No	77	156	155	50	Yes	Yes	Yes	1.99471	0.372437
1337	13	No	Yes	Textile	Small	7	4.5	18	16	18	4	38	Male	Married	3	Middle school	Production worker	blue collar	1100	1.17396	No	No	3040	65.7	1.61	25.3462	Overweight	82	No	No	110	70	No	No	No	No	No	No	83	188	171	34	No	No	No	3.5971	1.04088
1340	13	No	Yes	Textile	Small	7	4.5	18	44	12.375	2.75	41	Female	Single	0	High-school	Production worker	blue collar	937	1	No	No	2320	60.3	1.56	24.7781	Normal weight	80.7	No	No	130	90	No	No	No	No	No	No	82	232	155	64	Yes	Yes	No	3.16868	0.636606
1341	13	No	No	Textile	Small	7	4.5	18	44	12.375	2.75	32	Female	Single	0	Graduate	Manufacturing technician	white collar	2811	3	Yes	No	1080	78.5	1.65	28.8338	Overweight	91.9	No	No	110	70	No	No	No	No	No	No
1502	15	Yes	Yes	Food and beverages	Medium	11	1.75	7	187	21.8167	12.4667	47	Male	Married	0	Elementary school	Production worker	blue collar	1000	1.06724	No	No	840	71.2	1.65	26.1524	Overweight	92.5	Yes	No	150	110	No	No	No	No	No	No	203	329	505	38	Yes	No	Yes	19.4444	9.85272
1504	15	Yes	Yes	Food and beverages	Medium	11	1.75	7	187	21.8167	12.4667	30	Male	Single	0	Graduate	Administrative assistant	white collar	1405.5	1.5	No	No	2215	80.6	1.73	26.9304	Overweight	88.8	Yes	Yes	120	90	No	No	Yes	No	No	No	79	200	69	62	No	No	No	1.74771	0.173455
1509	15	Yes	No	Food and beverages	Medium	11	1.75	7	187	21.8167	12.4667	37	Male	Married	1	Middle school	Machine operator	blue collar	1000	1.06724	No	No	0	66.6	1.6	26.0156	Overweight	83.2	No	No	110	70	No	No	No	No	No	No
1510	15	Yes	Yes	Food and beverages	Medium	11	1.75	7	187	21.8167	12.4667	53	Male	Married	3	Elementary school	Machine operator	blue collar	937	1	No	Yes	240	71	1.68	25.1559	Overweight	92.8	No	No	90	70	No	No	No	No	No	No	78	219	76	62	No	No	No	8.58595	100
1511	15	Yes	Yes	Food and beverages	Medium	11	1.75	7	24	5.25	3	31	Female	Married	1	Post graduate	Manufacturing technician	blue collar	3300	3.52188	Yes	No	1920	74.5	1.68	26.396	Overweight	91.3	No	No	100	60	No	No	No	No	No	No	97	146	114	34	No	No	No	0.724822	0.414045
1512	15	Yes	No	Food and beverages	Medium	11	1.75	7	24	5.25	3	38	Female	Single	0	Post graduate	Plant manager	white collar	3748	4	Yes	No	810	62.1	1.63	23.3731	Normal weight	78.2	No	No	120	70	No	No	No	No	No	No
1518	15	Yes	Yes	Food and beverages	Medium	11	1.75	7	24	5.25	3	24	Female	Single	0	High-school	Administrative assistant	white collar	937	1	No	No	0	47.3	1.51	20.7447	Normal weight	72.7	No	No	100	70	No	No	No	No	No	No	66	181	104	62	No	No	No	0.339031	0.173581
1522	15	Yes	Yes	Food and beverages	Medium	11	1.75	7	24	5.25	3	23	Female	Single	0	Graduate	Administrative assistant	white collar	1124.4	1.2	Yes	No	0	46.5	1.6	20.7447	Normal weight	67.5	No	No	100	70	No	No	No	No	No	No	71	171	45	72	No	No	No	0.257946	0.08826
1523	15	Yes	Yes	Food and beverages	Medium	11	1.75	7	24	5.25	3	31	Female	Single	0	Graduate	Administrative assistant	white collar	937	1	No	No	2871	59.6	1.62	22.71	Normal weight	68.7	No	No	110	80	No	No	No	No	No	No	67	169	55	66	No	No	No	0.70365	0.121122
1527	15	Yes	Yes	Food and beverages	Medium	11	1.75	7	24	5.25	3	56	Female	Married	1	High-school	Administrative assistant	white collar	1908	2.03629	Yes	No	6045	76.5	1.57	31.0357	Obesity I	97.5	Yes	Yes	110	80	No	No	No	No	No	No	81	242	106	28	Yes	Yes	Yes	10.0278	4.79911
1528	15	Yes	Yes	Food and beverages	Medium	11	1.75	7	24	5.25	3	54	Female	Divorced	2	High-school	Machine operator	blue collar	937	1	No	No	1560	57.1	1.5	25.3778	Overweight	82.8	Yes	Yes	120	80	No	No	No	No	No	No	82	248	112	86	No	No	No	5.61066	1.72743
1531	15	Yes	Yes	Food and beverages	Medium	11	1.75	7	187	21.8167	12.4667	55	Male	Married	2	High-school	Manufacturing technician	white collar	1100	1.17396	No	No	2520	54.1	1.68	19.1681	Normal weight	72.3	No	No	130	100	No	No	No	No	No	No	78	153	210	30	Yes	No	Yes	13.0563	6.61236
1533	15	Yes	Yes	Food and beverages	Medium	11	1.75	7	187	21.8167	12.4667	41	Male	Married	2	Illiterate	Machine operator	blue collar	954	1.01814	No	No	280	72.3	1.63	27.2122	Overweight	89.9	No	No	120	80	No	No	No	No	No	No	83	150	59	46	No	No	No	3.15054	0.722603
1534	15	Yes	Yes	Food and beverages	Medium	11	1.75	7	187	21.8167	12.4667	38	Male	Married	1	High-school		blue collar	1350	1.44077		No	0	50.3	1.66	18.2537	Underweight	68.3	No	No	110	70	No	No	No	No	No	No	NORMAL	0	0	0	No	No	No	1.66713	0.260787
1535	15	Yes	Yes	Food and beverages	Medium	11	1.75	7	187	21.8167	12.4667	24	Male	Married	0	High-school	Production worker	white collar	937	1	No	No	1920	73.6	1.72	24.8783	Normal weight	81.3	No	No	120	80	No	No	No	No	No	No	NORMAL	0	0	0	No	No	No	0.604342	0.031226
1536	15	Yes	No	Food and beverages	Medium	11	1.75	7	187	21.8167	12.4667	36	Male	Married	1	High-school	Manufacturing technician	white collar	1500	1.60085	Yes	No	0	84.9	1.72	28.6979	Overweight	99.4	No	No	120	80	No	No	No	No	No	No	NORMAL	0	0	0
1537	15	Yes	Yes	Food and beverages	Medium	11	1.75	7	187	21.8167	12.4667	23	Male	Single	0	High-school	Production worker	blue collar	937	1	No	No	120	71	1.71	24.281	Normal weight	81.4	No	No	120	90	No	No	No	No	No	No	ELEVADA	0	0	0	No	No	No	0.507294	0.021181
1538	15	Yes	Yes	Food and beverages	Medium	11	1.75	7	187	21.8167	12.4667	48	Male	Married	3	High-school	Manufacturing technician	white collar	995	1.0619	Yes	No	730	70.5	1.74	23.2858	Normal weight	85.4	Yes	Yes	120	80	No	No	Yes	Yes	No	No	NORMAL	0	0	1	No	No	No	12.3225	4.75517
1539	15	Yes	Yes	Food and beverages	Medium	11	1.75	7	24	5.25	3	24	Female	Married	0	Graduate	Manufacturing technician	white collar	1312	1.40021	Yes	No	1320	67.2	1.58	26.9188	Overweight	78.6	No	No	110	70	No	No	No	No	No	No	NORMAL	0	0	0	No	No	No	0.502638	0.27206
1540	15	Yes	Yes	Food and beverages	Medium	11	1.75	7	187	21.8167	12.4667	38	Male	Divorced	4	Middle school	Machine operator	blue collar	937	1	No	No	0	69.3	1.69	24.2639	Normal weight	92	No	No	120	100	No	No	No	No	No	No	ELEVADA	0	0	0	No	No	No	5.3528	1.9868
1541	15	Yes	Yes	Food and beverages	Medium	11	1.75	7	187	21.8167	12.4667	25	Male	Single	0	High-school	Administrative assistant	white collar	1200	1.28068	No	No	2880	79.5	1.68	28.1675	Overweight	91.5	No	No	140	100	No	No	No	No	No	No	ELEVADA	0	0	0	No	No	No	1.61047	0.262763
1542	15	Yes	Yes	Food and beverages	Medium	11	1.75	7	187	21.8167	12.4667	47	Male	Single	2	High-school	Plant manager	white collar	1800	1.92102	No	No	1440	89.3	1.69	31.2664	Obesity I	112.2	No	No	130	100	Yes	No	Yes	No	Yes	No	ELEVADA	1	0	1	Yes	Yes	Yes	13.2753	0.005884
1543	15	Yes	Yes	Food and beverages	Medium	11	1.75	7	187	21.8167	12.4667	57	Male	Married	2	High-school	Manufacturing technician	white collar	2800	2.98826	No	Yes	792	82.9	1.7	28.6851	Overweight	103	No	No	120	80	No	No	No	No	No	No	NORMAL	0	0	0	No	No	No	20.5143	100
1901	19	Yes	Yes	Food and beverages	Medium	11	1.75	7	44	8.55556	4.88889	35	Female	Married	2	Graduate	Plant manager	white collar	3400	3.6286	No	No	0	80	1.63	30.1103	Obesity I	91.8	No	No	120	80	No	No	No	No	No	No	NORMAL	0	0	0	Yes	Yes	Yes	1.58089	0.439776
1902	19	Yes	Yes	Food and beverages	Medium	11	1.75	7	44	8.55556	4.88889	49	Female	Single	1	Graduate	Plant manager	white collar	3339	3.5635	Yes	No	3720	94.9	1.63	35.7183	Obesity I	103.8	No	No	130	80	No	No	No	No	No	No	ELEVADA	0	0	0	No	No	No	4.4965	1.05584
1903	19	Yes	Yes	Food and beverages	Medium	11	1.75	7	176	19.25	11	40	Male	Married	2	Middle school	Machine operator	blue collar	1600	1.70758	No	No	480	90.5	1.68	32.0649	Obesity I	100.4	Yes	Yes	140	110	No	No	No	No	No	No	ELEVADA	0	0	0	No	No	No	8.87821	2.44519
1904	19	Yes	Yes	Food and beverages	Medium	11	1.75	7	176	19.25	11	33	Male	Married	2	High-school	Administrative assistant	white collar	2170	2.3159	No	No	3360	85.1	1.74	28.1081	Overweight	93	No	No	110	70	No	No	No	No	No	No	NORMAL	0	0	0	No	No	No	1.94577	0.332838
1908	19	Yes	Yes	Food and beverages	Medium	11	1.75	7	44	8.55556	4.88889	38	Female	Married	1	High-school	Machine operator	blue collar	1650	1.76094	No	No	2280	67.8	1.6	26.4844	Overweight	92.5	No	No	90	60	No	No	Yes	No	No	No	NORMAL	0	0	1	No	No	No	0.735625	0.156945
1911	19	Yes	Yes	Food and beverages	Medium	11	1.75	7	176	19.25	11	27	Male	Single	0	High-school	Machine operator	blue collar	1400	1.49413	No	No	560	88.3	1.78	27.869	Overweight	96.8	No	No	100	70	No	No	No	No	No	No	NORMAL	0	0	0	No	No	No	0.664417	0.054015
1912	19	Yes	Yes	Food and beverages	Medium	11	1.75	7	44	8.55556	4.88889	36	Female	Married	3	High-school	Production worker	blue collar	954	1.01814	No	No	3720	78.3	1.62	29.8354	Overweight	94.3	No	No	90	60	No	No	No	No	No	No	NORMAL	0	0	0	No	No	No	0.736568	0.214205
1914	19	Yes	Yes	Food and beverages	Medium	11	1.75	7	176	19.25	11	43	Male	Married	2	Middle school	Machine operator	blue collar	1908	2.03629	No	No	1506	86.3	1.65	31.6988	Obesity I	102.5	No	No	130	80	No	No	No	No	No	No	ELEVADA	0	0	0	Yes	Yes	Yes	9.15722	3.78894
1915	19	Yes	Yes	Food and beverages	Medium	11	1.75	7	176	19.25	11	44	Male	Married	2	High-school	Manufacturing technician	white collar	5500	5.8698	Yes	No	0	62.8	1.66	22.79	Normal weight	82.4	No	No	120	80	No	No	No	No	No	No	NORMAL	0	0	0	No	No	No	4.19955	1.19305
1916	19	Yes	Yes	Food and beverages	Medium	11	1.75	7	176	19.25	11	31	Male	Married	0	High-school	Manufacturing technician	white collar	3000	3.20171	No	No	2880	95	1.76	30.6689	Obesity I	101	No	No	100	70	No	No	No	No	No	No	NORMAL	0	0	0	No	No	No	1.52008	0.282563
1920	19	Yes	No	Food and beverages	Medium	11	1.75	7	176	19.25	11	31	Male	Married	1	High-school	Production worker	blue collar	1000	1.06724	No	No	555.2	79.5	1.62	30.2926	Obesity I	94.5	No	No			No	No	No	No	No	No		0	0	0
1926	19	Yes	Yes	Food and beverages	Medium	11	1.75	7	176	19.25	11	39	Male	Married	2	Elementary school	Machine operator	blue collar	1135	1.21131	Yes	No	2457	87.4	1.71	29.8895	Overweight	102.5	No	No	120	80	No	No	No	No	No	No	NORMAL	0	0	0	No	No	No	3.31712	0.808938
1928	19	Yes	Yes	Food and beverages	Medium	11	1.75	7	176	19.25	11	36	Male	Married	2	Graduate	Plant manager	white collar	4123	4.40021	Yes	No	1760	79.6	1.81	24.2972	Normal weight	92.9	No	No	130	90	No	No	No	No	No	No	ELEVADA	0	0	0	No	No	No	2.56842	0.433296
1930	19	Yes	Yes	Food and beverages	Medium	11	1.75	7	44	8.55556	4.88889	33	Female	Married	2	High-school	Machine operator	blue collar	1660	1.77161	No	No	6720	60.5	1.6	23.7812	Normal weight	76.1	No	No	100	60	No	No	No	No	No	No	NORMAL	0	0	0	No	No	No	0.575607	0.096454
1931	19	Yes	Yes	Food and beverages	Medium	11	1.75	7	176	19.25	11	37	Male	Married	2	High-school	Machine operator	blue collar	1908	2.03629	No	No	600	75.3	1.63	28.3413	Overweight	94.9	No	No	120	80	No	No	No	No	No	No	NORMAL	0	0	0	No	No	No	2.46101	0.449225
1934	19	Yes	Yes	Food and beverages	Medium	11	1.75	7	176	19.25	11	23	Male	Single	0	High-school	Production worker	white collar	1088	1.16115	No	No	3375	72.3	1.73	24.1572	Normal weight	83.4	No	No	110	60	No	No	No	No	No	No	NORMAL	0	0	0	No	No	No	0.496424	0.025105
1936	19	Yes	Yes	Food and beverages	Medium	11	1.75	7	176	19.25	11	34	Male	Married	3	High-school	Production worker	blue collar	954	1.01814	No	No	1186	64.7	1.63	24.3517	Normal weight	88.4	No	No	100	80	No	No	No	No	No	No	NORMAL	0	0	0	No	No	No	1.92172	0.445663
1941	19	Yes	Yes	Food and beverages	Medium	11	1.75	7	176	19.25	11	34	Male	Married	1	Graduate	Manufacturing technician	white collar	3816	4.1	Yes	No	2777	85.2	1.8	26.3	Overweight	100.2	No	No	120	80	No	No	No	No	No	No	NORMAL	0	0	0	No	No	No	3.38475	0.854896
1942	19	Yes	Yes	Food and beverages	Medium	11	1.75	7	176	19.25	11	31	Male	Single	0	Post graduate	Administrative assistant	white collar	2958	3.15688	Yes	No	1120	78	1.69	27.31	Overweight	88.2	No	No	110	70	No	No	Yes	No	No	No	NORMAL	0	0	1	No	No	No	2.09365	0.476503
1946	19	Yes	Yes	Food and beverages	Medium	11	1.75	7	44	8.55556	4.88889	38	Female	Single	2	High-school	Production worker	blue collar	954	1.01814	No	No	1950	36.8	1.4	18.7755	Normal weight	65.2	No	No	110	70	No	No	No	No	No	No	NORMAL	0	0	0	No	No	No	0.982143	0.175863
1947	19	Yes	Yes	Food and beverages	Medium	11	1.75	7	176	19.25	11	23	Male	Married	2	High-school	Production worker	white collar	2000	2.13447	No	Yes	1920	83.7	1.79	26.1228	Overweight	86.9	No	No	110	80	No	No	No	No	No	No	NORMAL	0	0	0	No	No	No	0.79914	34.7242
1949	19	Yes	Yes	Food and beverages	Medium	11	1.75	7	44	8.55556	4.88889	34	Female	Married	1	Post graduate	Administrative assistant	white collar	2750	2.9349	Yes	No	1680	68.1	1.6	26.6016	Overweight	77.5	No	No	90	70	No	No	No	No	No	No	NORMAL	0	0	0	No	No	No	0.477349	0.105739
1950	19	Yes	Yes	Food and beverages	Medium	11	1.75	7	176	19.25	11	34	Male	Married	1	High-school	Machine operator	blue collar	1986	2.11953	No	No	3360	68.2	1.65	25.0505	Overweight	82.6	No	No	110	70	No	No	No	No	No	No	NORMAL	0	0	0	No	No	No	2.86834	0.733701
1951	19	Yes	Yes	Food and beverages	Medium	11	1.75	7	44	8.55556	4.88889	31	Female	Single	1	Post graduate	Administrative assistant	white collar	1900	2.02775	Yes	No	960	68.2	1.63	25.669	Overweight	84.3	Yes	Yes	110	70	No	No	No	No	No	No	NORMAL	0	0	0	No	No	No	1.34512	0.423553
1952	19	Yes	Yes	Food and beverages	Medium	11	1.75	7	44	8.55556	4.88889	34	Female	Married	1	Graduate	Administrative assistant	white collar	2862	3.05443	Yes	No	2880	75.8	1.67	27.3427	Overweight	86.5	No	No	100	80	No	No	No	No	No	No	NORMAL	0	0	0	No	No	No	1.11842	0.329544
2007	20	Yes	Yes	Non-metallic minerals	Medium	14	3	3	264	56.5714	18.8571	30	Male	Married	0	Post graduate	Administrative assistant	white collar	3816	4.07257	Yes	No	2440	81	1.76	26.1493	Overweight	88.3	No	No	130	90	No	No	Yes	No	Yes	No	ELEVADA	0	0	1	Yes	No	Yes	3.17197	0.882654
2010	20	Yes	No	Non-metallic minerals	Medium	14	3	3	264	56.5714	18.8571	49	Male	Single	0	Elementary school	Manufacturing technician	white collar	954	1.01814	No	Yes	160	61	1.65	22.4059	Normal weight	79	No	No	120	80	No	No	No	No	No	No	NORMAL	0	0	0
2016	20	Yes	Yes	Non-metallic minerals	Medium	14	3	3	264	56.5714	18.8571	34	Male	Divorced	1	Post graduate	Plant manager	white collar	8000	8.53789	Yes	No	1440	57.9	1.68	20.5145	Normal weight	72.2	No	No	120	80	No	No	No	No	No	No	NORMAL	0	0	0	No	No	No	2.78193	0.635659
2022	20	Yes	Yes	Non-metallic minerals	Medium	14	3	3	264	56.5714	18.8571	28	Male	Married	0	High-school	Administrative assistant	white collar	2500	2.66809	No	No	5133	74.3	1.76	23.9863	Normal weight	82.3	No	No	120	80	No	No	No	No	No	No	NORMAL	0	0	0	No	No	No	2.08545	0.471136
2032	20	Yes	Yes	Non-metallic minerals	Medium	14	3	3	264	56.5714	18.8571	28	Male	Single	0	Graduate	Manufacturing technician	white collar	1908	2.03629	No	No	1059	78.3	1.8	24.1667	Normal weight	84.7	No	No	120	80	No	No	No	No	No	No	NORMAL	0	0	0	No	No	No	2.49666	0.803731
2038	20	Yes	Yes	Non-metallic minerals	Medium	14	3	3	264	56.5714	18.8571	35	Male	Married	2	Post graduate	Plant manager	white collar	4770	5.09071	Yes	No	160	100.5	1.75	32.8163	Obesity I	106	Yes	Yes	140	110	No	No	Yes	No	Yes	No	ELEVADA	0	0	1	Yes	Yes	Yes	7.54632	1.93541
2040	20	Yes	Yes	Non-metallic minerals	Medium	14	3	3	264	56.5714	18.8571	49	Male	Married	3	High-school	Plant manager	white collar	954	1.01814	No	No	3840	71.6	1.7	24.7751	Normal weight	92	No	No	120	70	No	No	No	No	No	No	NORMAL	0	0	0	No	No	No	12.6869	6.05093
2043	20	Yes	Yes	Non-metallic minerals	Medium	14	3	3	29	12.4286	4.14286	38	Female	Divorced	2	Graduate	Plant manager	white collar	3700	3.94877	Yes	No	5760	113.1	1.8	34.9136	Obesity I	112.5	Yes	Yes	120	80	No	No	No	No	No	No	NORMAL	0	0	0	Yes	Yes	Yes	3.93697	1.79735
2044	20	Yes	No	Non-metallic minerals	Medium	14	3	3	264	56.5714	18.8571	71	Male	Married	2	Elementary school	Manufacturing technician	blue collar	8000	8.53789	No	No	0	99.8	1.59	39.4763	Obesity I	120.2	Yes	Yes	140	80	No	No	No	No	Yes	No	ELEVADA	0	0	0
2045	20	Yes	Yes	Non-metallic minerals	Medium	14	3	3	264	56.5714	18.8571	55	Male	Married	3	Elementary school	Manufacturing technician	white collar	1800	1.92102	No	No	407.5	69.2	1.64	25.7287	Overweight	86.5	Yes	No	130	90	No	No	No	No	No	No	ELEVADA	0	0	0	No	No	No	12.2887	6.09029
2046	20	Yes	Yes	Non-metallic minerals	Medium	14	3	3	264	56.5714	18.8571	49	Male	Single	0	Elementary school		blue collar	1000	1.06724	No	No	1806	107.7	1.74	35.5727	Obesity I	114.5	No	No	120	90	No	No	No	No	No	No	ELEVADA	0	0	0	Yes	Yes	Yes	11.1653	5.20348
2047	20	Yes	Yes	Non-metallic minerals	Medium	14	3	3	264	56.5714	18.8571	49	Male	Married	2	Graduate	Administrative assistant	white collar	2862	3.05443	Yes	No	1632	81.6	1.73	27.2645	Overweight	94.2	Yes	Yes	110	80	No	No	Yes	No	No	No	NORMAL	0	0	1	Yes	Yes	Yes	12.9724	5.06065
2048	20	Yes	Yes	Non-metallic minerals	Medium	14	3	3	29	12.4286	4.14286	23	Female	Single	0	Graduate	Administrative assistant	white collar	954	1.01814	No	No	3120	72.3	1.63	27.2122	Overweight	89	No	No	100	70	No	No	Yes	No	No	No	NORMAL	0	0	1	No	No	No	0.419212	1.34369
2049	20	Yes	Yes	Non-metallic minerals	Medium	14	3	3	29	12.4286	4.14286	23	Female	Single	0	High-school	Administrative assistant	white collar	954	1.01814	No	No	960	62.7	1.56	25.7643	Overweight	80.5	No	No	90	70	No	No	No	No	No	No	NORMAL	0	0	0	No	No	No	0.189339	0.116741
2050	20	Yes	Yes	Non-metallic minerals	Medium	14	3	3	29	12.4286	4.14286	41	Female	Divorced	6	Middle school	Machine operator	blue collar	954	1.01814	No	Yes	2200	53.1	1.45	25.2556	Overweight	83.1	Yes	Yes	200	80	No	No	No	No	No	No	ELEVADA	0	0	0	Yes	Yes	Yes	25.3924	15.2108
2051	20	Yes	Yes	Non-metallic minerals	Medium	14	3	3	29	12.4286	4.14286	35	Female	Married	3	Graduate	Plant manager	white collar	5000	5.33618	Yes	No	3360	73.6	1.61	28.394	Overweight	92.3	No	No	100	70	No	No	No	No	No	No	NORMAL	0	0	0	No	No	No	1.32368	0.837089
2052	20	Yes	Yes	Non-metallic minerals	Medium	14	3	3	264	56.5714	18.8571	50	Male	Married	3	Middle school	Machine operator	blue collar	3000	3.20171	Yes	No	1398	84.7	1.7	29.308	Overweight	102.6	Yes	Yes	110	80	Yes	Yes	Yes	No	Yes	No	NORMAL	1	1	1	Yes	Yes	Yes	36.45	0.020126
2053	20	Yes	Yes	Non-metallic minerals	Medium	14	3	3	29	12.4286	4.14286	43	Female	Single	4	Middle school	Food processing worker	blue collar	1200	1.28068	No	No	3360	61	1.51	26.7532	Overweight	91	Yes	No	140	90	Yes	Yes	No	No	No	No	ELEVADO	1	1	0	Yes	Yes	Yes	13.0736	6.35299
2054	20	Yes	Yes	Non-metallic minerals	Medium	14	3	3	264	56.5714	18.8571	24	Male	Married	1	High-school	Manufacturing technician	white collar	1900	2.02775	Yes	No	960	100.6	1.8	31.0494	Obesity I	104	Yes	No	130	90	No	No	No	No	No	No	ELEVADA	0	0	0	Yes	Yes	Yes	1.7212	0.422802
2055	20	Yes	Yes	Non-metallic minerals	Medium	14	3	3	264	56.5714	18.8571	24	Male	Single	0	High-school	Production worker	white collar	1200	1.28068	No	No	2047.5	78.5	1.73	26.2287	Overweight	89.5	No	No	120	80	No	No	No	No	No	No	NORMAL	0	0	0	No	No	No	0.644195	0.042419
2056	20	Yes	Yes	Non-metallic minerals	Medium	14	3	3	29	12.4286	4.14286	32	Female	Married	2	High-school	Manufacturing technician	white collar	1238	1.32124	Yes	No	5445	60.2	1.56	24.737	Normal weight	85.5	No	No	110	80	No	No	No	No	No	No	NORMAL	0	0	0	No	No	No	1.17779	0.649989
2203	22	No	No	Food and beverages	Small	1	3	12	55	7.5	2.5	30	Male	Single	0	Middle school	Production worker	blue collar	937	1	No	No	1191.8	64	1.69	22.4082	Normal weight	74.8	No	No	130	100	No	No	No	No	No	No	ELEVADA	0	0	0
2208	22	No	Yes	Food and beverages	Small	1	3	12	55	7.5	2.5	37	Male	Married	0	Elementary school	Production worker	blue collar	937	1	No	No	660	72.4	1.71	24.7598	Normal weight	92	No	No	150	100	No	No	No	No	No	No	ELEVADA	0	0	0	No	No	No	5.2598	1.37885
2209	22	No	Yes	Food and beverages	Small	1	3	12	55	7.5	2.5	38	Male	Married	1	Middle school	Production worker	blue collar	937	1	No	No	960	73.6	1.65	27.034	Overweight	88.4	No	No	120	80	No	No	No	No	No	No	NORMAL	0	0	0	No	No	No	2.98329	0.709636
2210	22	No	Yes	Food and beverages	Small	1	3	12	8	8	2.66667	37	Female	Married	1	High-school	Production worker	blue collar	937	1	No	No	480	73.2	1.53	31.27	Obesity I	100.1	Yes	No	180	120	No	No	No	No	No	No	ELEVADA	0	0	0	No	No	No	5.5867	0.789653
2213	22	No	Yes	Food and beverages	Small	1	3	12	55	7.5	2.5	30	Male	Single	0	Graduate	Plant manager	white collar	2500	2.66809	Yes	No	1120	85.6	1.71	29.274	Overweight	95.1	No	No	120	70	No	No	No	No	No	No	NORMAL	0	0	0	No	No	No	1.48559	0.205546
2215	22	No	Yes	Food and beverages	Small	1	3	12	55	7.5	2.5	38	Male	Married	3	Middle school	Production worker	blue collar	937	1	No	No	0	76.9	1.65	28.2461	Overweight	91.1	No	No	110	70	No	No	No	No	No	No	NORMAL	0	0	0	No	No	No	2.32779	0.502739
2216	22	No	No	Food and beverages	Small	1	3	12	55	7.5	2.5	52	Male	Married	6	Illiterate	Manufacturing technician	white collar	1200	1.28068	No	No	0	82.2	1.63	30.9383	Obesity I	101.2	No	No	120	80	No	No	No	No	No	No	NORMAL	0	0	0
2218	22	No	Yes	Food and beverages	Small	1	3	12	55	7.5	2.5	32	Male	Single	1	Elementary school	Machine operator	blue collar	937	1	No	No	0	73.8	1.82	22.2799	Normal weight	80.2	No	No			Yes	Yes	No	No	No	No		1	1	0	No	No	No		1.4e-07
2219	22	No	Yes	Food and beverages	Small	1	3	12	55	7.5	2.5	57	Male	Married	5	Elementary school	Production worker	blue collar	937	1	No	No	720	60.1	1.62	22.9005	Normal weight	81.3	No	No	110	70	No	No	No	No	No	No	NORMAL	0	0	0	No	No	No	7.8598	4.58461
2220	22	No	Yes	Food and beverages	Small	1	3	12	55	7.5	2.5	38	Male	Married	2	High-school	Plant manager	white collar	1800	1.92102	No	No	0	92.6	1.81	28.2653	Overweight	101	Yes	No	150	100	No	No	No	No	No	No	ELEVADA	0	0	0	Yes	Yes	No	4.19898	0.867271
2221	22	No	Yes	Food and beverages	Small	1	3	12	55	7.5	2.5	59	Male	Widower	3	Elementary school	Production worker	blue collar	937	1	No	No	0	71.3	1.65	26.1892	Overweight	87.7	Yes	No	150	110	No	No	No	No	No	No	ELEVADA	0	0	0	No	No	No	20.7167	12.11
2222	22	No	Yes	Food and beverages	Small	1	3	12	55	7.5	2.5	61	Male	Divorced	2	Middle school	Production worker	blue collar	1200	1.28068	No	No	711	62.3	1.55	25.9313	Overweight	97	Yes	Yes	110	80	No	No	No	No	No	No	NORMAL	0	0	0	No	No	No	9.39836	5.83453
2224	22	No	Yes	Food and beverages	Small	1	3	12	55	7.5	2.5	62	Male	Married	3	Elementary school	Production worker	blue collar	937	1	No	No	720	57.1	1.61	22.0285	Normal weight	83.4	No	No	140	80	No	No	No	No	No	No	ELEVADA	0	0	0	No	No	No	16.2196	11.0199
2228	22	No	Yes	Food and beverages	Small	1	3	12	55	7.5	2.5	43	Male	Married	2	Middle school	Production worker	blue collar	1100	1.17396	No	No	0	78.3	1.72	26.467	Overweight	97.8	No	No	130	90	No	No	No	No	No	No	ELEVADA	0	0	0	No	No	No	5.07514	1.51216
2229	22	No	Yes	Food and beverages	Small	1	3	12	55	7.5	2.5	28	Male	Single	0	Middle school	Production worker	blue collar	937	1	No	Yes	0	109.1	1.75	35.6245	Obesity I	107.9	No	No	140	90	No	No	No	No	No	No	ELEVADA	0	0	0	Yes	Yes	Yes	2.99098	98.9845
2234	22	No	Yes	Food and beverages	Small	1	3	12	55	7.5	2.5	52	Male	Married	3	Elementary school	Production worker	blue collar	937	1	No	No	0	81.2	1.68	28.7698	Overweight	102.3	No	No	120	80	No	No	No	No	No	No	NORMAL	0	0	0	No	No	No	6.11556	2.69341
2236	22	No	Yes	Food and beverages	Small	1	3	12	55	7.5	2.5	21	Male	Single	0	High-school	Production worker	blue collar	937	1	No	No	1200	69.1	1.8	21.3272	Normal weight	75	No	No	100	70	No	No	No	No	No	No	NORMAL	0	0	0	No	No	No	0.214478	0.004639
2237	22	No	Yes	Food and beverages	Small	1	3	12	55	7.5	2.5	19	Male	Single	0	High-school	Machine operator	blue collar	937	1	No	No	2052	70.2	1.76	22.6627	Normal weight	78.2	No	No	120	80	No	No	No	No	No	No	NORMAL	0	0	0	No	No	No	0.212452	0.002972
2238	22	No	Yes	Food and beverages	Small	1	3	12	55	7.5	2.5	38	Male	Married	2	High-school	Plant manager	white collar	1908	2.03629	No	No	720	62.6	1.57	25.3966	Overweight	88.6	Yes	Yes	160	120	No	No	Yes	Yes	No	No	ELEVADA	0	0	1	No	No	No	7.3672	1.4561
2239	22	No	Yes	Food and beverages	Small	1	3	12	55	7.5	2.5	32	Male	Single	1	Elementary school	Production worker	blue collar	800	0.853789	No	Yes	198	66.4	1.74	21.9316	Normal weight	84	No	No	120	90	No	No	No	No	No	No	ELEVADA	0	0	0	No	No	No	2.27956	94.7722
2240	22	No	Yes	Food and beverages	Small	1	3	12	8	8	2.66667	29	Female	Married	0	High-school	Administrative assistant	white collar	1908	2.03629	No	No	2640	76.6	1.67	27.466	Overweight	93	No	No	140	80	No	No	No	No	No	No	ELEVADA	0	0	0	No	No	No	1.12548	0.147287
2241	22	No	Yes	Food and beverages	Small	1	3	12	55	7.5	2.5	20	Male	Single	0	Middle school	Production worker	blue collar	937	1	No	No	4312	76.4	1.84	22.5662	Normal weight	80	No	No	110	70	No	No	No	No	No	No	NORMAL	0	0	0	No	No	No	0.244272	0.00539
2242	22	No	Yes	Food and beverages	Small	1	3	12	55	7.5	2.5	65	Male	Divorced	4	Middle school	Manufacturing technician	white collar	3800	4.0555	Yes	No	0	78.8	1.6	30.7813	Obesity I	101.3	Yes	Yes	170	110	No	No	No	No	No	No	ELEVADA	0	0	0	Yes	Yes	No	32.3683	21.2669
2243	22	No	Yes	Food and beverages	Small	1	3	12	8	8	2.66667	37	Female	Married	2	High-school	Plant manager	white collar	1052	1.12273	No	No	0	59.8	1.56	24.5726	Normal weight	85.5	No	No	100	70	No	No	No	No	No	No	NORMAL	0	0	0	No	No	No	0.92392	0.180616
2244	22	No	Yes	Food and beverages	Small	1	3	12	55	7.5	2.5	58	Male	Single	2	Elementary school	Production worker	blue collar	937	1	No	No	3310	79.7	1.64	29.6327	Overweight	101.3	No	No	150	110	No	No	No	No	No	No	ELEVADA	0	0	0	No	No	No	12.9098	7.57733
2501	25	Yes	Yes	Food and beverages	Small	10	1.33333	4	54	4	3	41	Male	Married	2	Elementary school	Manufacturing technician	white collar	1300	1.38741	No	No	2115.6	88.3	1.63	33.2342	Obesity I	104.3	No	No	140	90	No	No	No	No	No	No	ELEVADA	0	0	0	Yes	Yes	Yes	5.64277	1.36502
2503	25	Yes	Yes	Food and beverages	Small	10	1.33333	4	6	4	3	52	Female	Married	3	Elementary school	Plant manager	white collar	937	1	No	No	600	80	1.6	31.25	Obesity I	105.9	Yes	Yes	140	90	No	No	No	No	No	No	ELEVADA	0	0	0	No	No	No	10.3851	3.02829
2506	25	Yes	Yes	Food and beverages	Small	10	1.33333	4	54	4	3	44	Male	Married	3	Elementary school	Production worker	blue collar	1000	1.06724	No	No	360	70.1	1.48	32.0033	Obesity I	90.8	Yes	No	150	110	No	No	No	No	No	No	ELEVADA	0	0	0	No	No	No	6.91945	2.06952
2507	25	Yes	Yes	Food and beverages	Small	10	1.33333	4	54	4	3	70	Male	Married	1	Elementary school	Machine operator	blue collar	982	1.04803	No	No	612	84.1	1.66	30.5197	Obesity I	105.6	No	No	120	70	No	No	Yes	No	Yes	No	NORMAL	0	0	1	Yes	Yes	Yes	36.4317	22.9221
2511	25	Yes	Yes	Food and beverages	Small	10	1.33333	4	54	4	3	54	Male	Married	2	High-school	Plant manager	white collar	4531	4.83565	Yes	No	3360	68.5	1.64	25.4685	Overweight	89.8	No	No	120	70	No	No	No	No	No	No	NORMAL	0	0	0	No	No	No	14.4173	7.38469
2517	25	Yes	Yes	Food and beverages	Small	10	1.33333	4	54	4	3	31	Male	Married	4	Middle school	Machine operator	blue collar	1100	1.17396	No	No	2540	66.1	1.68	23.4198	Normal weight	78.5	No	No	110	70	No	No	No	No	No	No	NORMAL	0	0	0	No	No	No	1.7361	0.296176
2520	25	Yes	Yes	Food and beverages	Small	10	1.33333	4	54	4	3	39	Male	Married	1	Middle school	Machine operator	blue collar	937	1	No	No	480	83.9	1.65	30.8173	Obesity I	98.1	No	No	160	100	No	No	No	No	No	No	ELEVADA	0	0	0	Yes	Yes	Yes	7.83149	2.11297
2525	25	Yes	Yes	Food and beverages	Small	10	1.33333	4	54	4	3	29	Male	Married	2	High-school	Production worker	blue collar	1500	1.60085	No	No	4038	75.3	1.66	27.3262	Overweight	85.6	Yes	Yes	130	90	No	No	No	No	No	No	ELEVADA	0	0	0	Yes	No	Yes	4.09329	0.984812
2529	25	Yes	Yes	Food and beverages	Small	10	1.33333	4	54	4	3	56	Male	Married	3	Elementary school	Machine operator	blue collar	937	1	No	No	0	67.1	1.6	26.2109	Overweight	106.9	Yes	Yes	130	90	No	No	No	No	No	No	ELEVADA	0	0	0	Yes	Yes	Yes	31.7467	14.941
2531	25	Yes	Yes	Food and beverages	Small	10	1.33333	4	54	4	3	55	Male	Married	4	High-school	Machine operator	blue collar	937	1	No	No	1680	80.3	1.67	28.7927	Overweight	100.7	No	No	110	70	No	No	No	No	No	No	NORMAL	0	0	0	No	No	No	8.57561	4.46215
2533	25	Yes	Yes	Food and beverages	Small	10	1.33333	4	54	4	3	31	Male	Married	4	Elementary school	Machine operator	blue collar	937	1	No	No	8617	79.6	1.68	28.2029	Overweight	89.6	No	No			No	No	No	No	No	No		0	0	0	No	No	No		0.000108
2537	25	Yes	Yes	Food and beverages	Small	10	1.33333	4	54	4	3	26	Male	Single	1	High-school	Production worker	blue collar	937	1	No	No	600	65.9	1.63	24.8033	Normal weight	80.4	No	No	120	80	No	No	No	No	No	No	NORMAL	0	0	0	No	No	No	0.702469	0.033116
2538	25	Yes	Yes	Food and beverages	Small	10	1.33333	4	54	4	3	31	Male	Single	0	High-school	Production worker	blue collar	937	1	No	No	1560	73.6	1.7	25.4671	Overweight	81.1	No	No	120	80	No	No	No	No	No	No	NORMAL	0	0	0	No	No	No	1.95101	0.330593
2544	25	Yes	Yes	Food and beverages	Small	10	1.33333	4	54	4	3	28	Male	Married	0	High-school	Production worker	blue collar	937	1	No	No	9000	58.2	1.69	20.3774	Normal weight	69.2	No	No	110	80	No	No	No	No	No	No	NORMAL	0	0	0	No	No	No	0.62143	0.035188
2547	25	Yes	Yes	Food and beverages	Small	10	1.33333	4	54	4	3	39	Male	Single	0	Elementary school	Production worker	blue collar	937	1	No	No	0	65.3	1.71	22.3317	Normal weight	82.9	No	No	120	70	No	No	No	No	No	No	NORMAL	0	0	0	No	No	No	4.79915	1.4901
2548	25	Yes	Yes	Food and beverages	Small	10	1.33333	4	54	4	3	44	Male	Married	2	Elementary school	Machine operator	blue collar	937	1	No	No	2280	69.1	1.68	24.4827	Normal weight	86.4	No	No	120	80	No	No	No	No	No	No	NORMAL	0	0	0	No	No	No	3.94301	1.04847
2549	25	Yes	Yes	Food and beverages	Small	10	1.33333	4	54	4	3	23	Male	Single	0	High-school	Production worker	blue collar	937	1	No	No	3532	72.8	1.67	26.1035	Overweight	83.9	No	No	120	80	No	No	No	No	No	No	NORMAL	0	0	0	No	No	No	0.542847	0.021067
2550	25	Yes	Yes	Food and beverages	Small	10	1.33333	4	54	4	3	26	Male	Married	2	Middle school	Production worker	blue collar	937	1	No	No	1560	97.3	1.68	34.4742	Obesity I	106.8	No	No	130	90	No	No	No	No	No	No	ELEVADO	0	0	0	Yes	Yes	Yes	1.42832	0.188901
2551	25	Yes	Yes	Food and beverages	Small	10	1.33333	4	54	4	3	44	Male	Married	4	Elementary school	Production worker	blue collar	937	1	No	No	1188	89.2	1.85	26.2043	Overweight	94.3	Yes	No	120	90	No	No	No	No	No	No	ELEVADO	0	0	0	Yes	Yes	No	6.35224	2.1525
2552	25	Yes	Yes	Food and beverages	Small	10	1.33333	4	6	4	3	33	Female	Married	3	Graduate	Administrative assistant	white collar	937	1	No	No	2560	74.1	1.6	28.9453	Overweight	84.2	No	No	110	80	No	No	No	No	No	No	NORMAL	0	0	0	No	No	No	1.32863	0.610084
2601	26	No	Yes	Non-metallic minerals	Small	4	2.66667	8	62	8.26667	3.1	44	Male	Married	2	Elementary school	Production worker	blue collar	937	1	No	No	210	65.2	1.63	24.5399	Normal weight	83.5	No	No	120	80	No	No	No	No	No	No	NORMAL	0	0	0	No	No	No	6.81249	2.49757
2602	26	No	Yes	Non-metallic minerals	Small	4	2.66667	8	62	8.26667	3.1	35	Male	Married	3	Elementary school	Production worker	blue collar	937	1	No	No	260	55.2	1.66	20.0319	Normal weight	74.8	No	No	130	80	No	No	No	No	No	No	ELEVADA	0	0	0	No	No	No	2.84568	0.570204
2606	26	No	Yes	Non-metallic minerals	Small	4	2.66667	8	2	2.66667	1	27	Female	Single	0	High-school	Manufacturing technician	white collar	937	1	Yes	No	2452	60.6	1.6	23.6719	Normal weight	75	No	No	100	70	No	No	No	No	No	No	NORMAL	0	0	0	No	No	No	0.514369	0.248045
2608	26	No	Yes	Non-metallic minerals	Small	4	2.66667	8	62	8.26667	3.1	30	Male	Married	2	High-school	Manufacturing technician	white collar	1520	1.6222	No	No	2240	82.9	1.71	28.3506	Overweight	94.1	No	No	110	80	No	No	No	No	No	No	NORMAL	0	0	0	Yes	Yes	No	2.0003	0.460475
2609	26	No	Yes	Non-metallic minerals	Small	4	2.66667	8	62	8.26667	3.1	48	Male	Married	3	Elementary school	Manufacturing technician	white collar	1431	1.52721	No	No	720	70.3	1.69	24.614	Normal weight	91.7	No	No	140	70	No	No	No	No	No	No	ELEVADA	0	0	0	No	No	No	9.55462	3.85333
2611	26	No	Yes	Non-metallic minerals	Small	4	2.66667	8	62	8.26667	3.1	48	Male	Married	7	Middle school	Production worker	blue collar	937	1	No	Yes	0	68	1.68	24.093	Normal weight	86.5	No	No	130	70	No	No	No	No	No	No	ELEVADA	0	0	0	No	No	No	14.0812	100
2614	26	No	Yes	Non-metallic minerals	Small	4	2.66667	8	62	8.26667	3.1	60	Male	Married	5	Illiterate	Production worker	blue collar	937	1	No	Yes	0	66.5	1.53	28.4079	Overweight	96.9	Yes	Yes	150	90	No	No	No	No	No	No	ELEVADA	0	0	0	No	No	No	38.3666	100
2621	26	No	Yes	Non-metallic minerals	Small	4	2.66667	8	62	8.26667	3.1	41	Male	Married	1	Elementary school	Machine operator	blue collar	1431	1.52721	No	No	1680	86.9	1.6	33.9453	Obesity I	107.9	No	No	120	80	No	No	Yes	No	No	No	NORMAL	0	0	1	No	No	No	4.43702	1.33593
2622	26	No	Yes	Non-metallic minerals	Small	4	2.66667	8	62	8.26667	3.1	44	Male	Married	2	Elementary school	Production worker	blue collar	1200	1.28068	No	No	1074	90.3	1.8	27.8704	Overweight	99.3	No	No	150	90	No	No	No	No	No	No	ELEVADA	0	0	0	No	No	No	9.52294	3.36839
2627	26	No	Yes	Non-metallic minerals	Small	4	2.66667	8	62	8.26667	3.1	48	Male	Married	0	High-school	Plant manager	white collar	2500	2.66809	No	No	0	123	1.72	41.5765	Obesity III	132.8	No	No	140	90	No	No	No	No	No	No	ELEVADA	0	0	0	No	No	No	8.58985	3.31568
2633	26	No	Yes	Non-metallic minerals	Small	4	2.66667	8	62	8.26667	3.1	45	Male	Married	2	Elementary school	Machine operator	blue collar	1200	1.28068	Yes	No	247.5	91.1	1.63	34.2881	Obesity I	108.8	No	No	130	90	No	No	No	No	No	No	ELEVADA	0	0	0	Yes	Yes	Yes	7.90945	2.83663
2634	26	No	Yes	Non-metallic minerals	Small	4	2.66667	8	2	2.66667	1	36	Female	Married	1	Graduate	Administrative assistant	white collar	1350	1.44077	Yes	No	0	68.2	1.53	29.1341	Overweight	92	No	No	90	70	No	No	No	No	No	No	NORMAL	0	0	0	No	No	No	0.933687	0.432917
2635	26	No	Yes	Non-metallic minerals	Small	4	2.66667	8	62	8.26667	3.1	64	Male	Married	3	Illiterate	Machine operator	white collar	937	1	No	No	180	86.7	1.65	31.8457	Obesity I	105.8	Yes	Yes	155	80	No	No	No	No	No	No	ELEVADA	0	0	0	No	No	No	29.7219	18.3393
2636	26	No	Yes	Non-metallic minerals	Small	4	2.66667	8	62	8.26667	3.1	34	Male	Married	1	Middle school	Manufacturing technician	white collar	1431	1.52721	No	Yes	304	83.7	1.72	28.2923	Overweight	96.5	No	No	120	80	No	No	No	No	No	No	NORMAL	0	0	0	Yes	Yes	No	7.23973	100
2637	26	No	Yes	Non-metallic minerals	Small	4	2.66667	8	62	8.26667	3.1	36	Male	Single	2	High-school	Machine operator	blue collar	1431	1.52721	No	No	1257	75	1.58	30.0433	Obesity I	95.8	No	No	120	80	No	No	No	No	No	No	NORMAL	0	0	0	No	No	No	2.71073	0.577824
2638	26	No	Yes	Non-metallic minerals	Small	4	2.66667	8	62	8.26667	3.1	34	Male	Married	2	Elementary school	Production worker	blue collar	1100	1.17396	No	No	240	68.4	1.7	23.6678	Normal weight	87.3	No	No			No	No	No	No	No	No		0	0	0	No	No	No		6.7e-05
2639	26	No	No	Non-metallic minerals	Small	4	2.66667	8	62	8.26667	3.1	61	Male	Married	7	Elementary school	Manufacturing technician	white collar	1600	1.70758	No	Yes	0	87.1	1.68	30.8603	Obesity I	111	No	No	130	90	No	No	No	No	No	No	ELEVADA	0	0	0
2640	26	No	Yes	Non-metallic minerals	Small	4	2.66667	8	62	8.26667	3.1	37	Male	Married	2	Elementary school	Machine operator	blue collar	1600	1.70758	No	No	405	80.7	1.69	28.2553	Overweight	93	No	No	150	100	No	No	No	No	No	No	ELEVADA	0	0	0	No	No	No	5.7377	1.50694
2641	26	No	Yes	Non-metallic minerals	Small	4	2.66667	8	62	8.26667	3.1	35	Male	Single	0	Elementary school	Production worker	blue collar	1800	1.92102	No	No	1680	66.2	1.71	22.6394	Normal weight	78.9	No	No	130	80	No	No	No	No	No	No	ELEVADA	0	0	0	No	No	No	2.03975	0.294874
2642	26	No	Yes	Non-metallic minerals	Small	4	2.66667	8	62	8.26667	3.1	37	Male	Married	4	Middle school	Production worker	blue collar	937	1	No	Yes	495	63.1	1.74	20.8416	Normal weight	78.6	No	No	130	70	No	No	No	No	No	No	ELEVADA	0	0	0	No	No	No	4.4857	99.994
2643	26	No	Yes	Non-metallic minerals	Small	4	2.66667	8	62	8.26667	3.1	38	Male	Married	3	Elementary school	Machine operator	blue collar	1431	1.52721	No	No	0	79	1.59	31.2488	Obesity I	105	Yes	Yes	140	90	No	No	No	No	No	No	ELEVADA	0	0	0	Yes	Yes	Yes	7.09725	1.62407
2644	26	No	No	Non-metallic minerals	Small	4	2.66667	8	62	8.26667	3.1	26	Male	Single	0	Elementary school	Production worker	blue collar	1500	1.60085	No	Yes	777	72.6	1.77	23.1734	Normal weight	81.2	No	No	110	70	No	No	No	No	No	No	ELEVADA	0	0	0
2701	27	Yes	Yes	Food and beverages	Small	10	1.33333	4	20	1.90476	1.42857	36	Male	Married	3	Graduate	Machine operator	blue collar	957	1.00314	No	No	3360	56.7	1.62	21.6049	Normal weight	78.9	No	No	120	80	No	No	No	No	No	No	NORMAL	0	0	0	No	No	No	3.10854	0.798344
2702	27	Yes	Yes	Food and beverages	Small	10	1.33333	4	20	1.90476	1.42857	22	Male	Married	1	Middle school	Production worker	blue collar	880	0.922432	No	No	5520	60.7	1.62	23.1291	Normal weight	77.5	No	No	130	80	No	No	Yes	No	No	No	ELEVADA	0	0	1	No	No	No	0.397069	0.009993
2703	27	Yes	Yes	Food and beverages	Small	10	1.33333	4	20	1.90476	1.42857	34	Male	Married	2	High-school	Production worker	blue collar	937	0.98218	No	No	0	67.9	1.64	25.2454	Overweight	86	No	No	130	90	No	No	No	No	No	No	ELEVADA	0	0	0	No	No	No	2.74136	0.549073
2704	27	Yes	Yes	Food and beverages	Small	10	1.33333	4	7	1.86667	1.4	42	Female	Divorced	1	High-school	Machine operator	blue collar	937	0.98218	No	No	1059	82.4	1.69	28.8505	Overweight	91.3	No	No	120	70	No	No	No	No	No	No	NORMAL	0	0	0	No	No	No	1.72202	0.26355
2705	27	Yes	Yes	Food and beverages	Small	10	1.33333	4	20	1.90476	1.42857	36	Male	Single	4	Elementary school	Machine operator	blue collar	937	0.98218	No	No	4680	68.7	1.62	26.1774	Overweight	92.3	No	No	130	90	No	No	No	No	No	No	ELEVADA	0	0	0	No	No	No	4.25832	1.18477
2706	27	Yes	Yes	Food and beverages	Small	10	1.33333	4	7	1.86667	1.4	43	Female	Single	2	Graduate	Plant manager	white collar	1908	2	Yes	No	0	82.9	1.59	32.7914	Obesity I	91	Yes	No	120	80	No	No	Yes	No	No	No	NORMAL	0	0	1	No	No	No	2.55247	0.577421
2707	27	Yes	Yes	Food and beverages	Small	10	1.33333	4	20	1.90476	1.42857	26	Male	Married	1	Elementary school	Production worker	blue collar	870	0.91195	No	No	480	61.7	1.67	22.1234	Normal weight	73.9	No	No	110	60	No	No	No	No	No	No	NORMAL	0	0	0	No	No	No	0.441633	0.014358
2708	27	Yes	Yes	Food and beverages	Small	10	1.33333	4	20	1.90476	1.42857	30	Male	Single	0	High-school	Production worker	blue collar	1040	1.09015	No	No	0	70.4	1.64	26.1749	Overweight	89.5	No	No	120	70	No	No	No	No	No	No	NORMAL	0	0	0	No	No	No	1.72676	0.270132
2709	27	Yes	Yes	Food and beverages	Small	10	1.33333	4	7	1.86667	1.4	41	Female	Single	3	High-school	Production worker	blue collar	937	0.98218	No	No	1680	61.3	1.59	24.2475	Normal weight	79.3	No	No	110	80	No	No	No	No	No	No	NORMAL	0	0	0	No	No	No	1.28903	0.211812
2710	27	Yes	Yes	Food and beverages	Small	10	1.33333	4	20	1.90476	1.42857	37	Male	Single	2	Middle school	Machine operator	blue collar	961	1.00734	Yes	No	5047.5	66.9	1.61	25.8092	Overweight	88.8	No	No	110	80	No	No	No	No	No	No	NORMAL	0	0	0	No	No	No	2.69164	0.628842
2711	27	Yes	Yes	Food and beverages	Small	10	1.33333	4	20	1.90476	1.42857	30	Male	Married	0	High-school	Machine operator	blue collar	953	0.998952	No	No	720	79	1.79	24.7942	Normal weight	87.3	No	No	130	90	No	No	No	No	No	No	ELEVADA	0	0	0	No	No	No	1.40868	0.137443
2712	27	Yes	Yes	Food and beverages	Small	10	1.33333	4	7	1.86667	1.4	22	Female	Single	0	High-school	Plant manager	white collar	1500	1.57233	No	No	0	75.4	1.64	28.0339	Overweight	81.7	No	No	120	90	No	No	No	No	No	No	ELEVADA	0	0	0	Yes	Yes	Yes	0.607467	1.13065
2713	27	Yes	Yes	Food and beverages	Small	10	1.33333	4	20	1.90476	1.42857	27	Male	Single	2	Graduate	Plant manager	white collar	1908	2	Yes	No	2700	129.5	1.79	40.417	Obesity III	114.3	No	No	140	100	No	No	No	No	No	No	ELEVADA	0	0	0	Yes	Yes	Yes	1.6056	0.179523
2714	27	Yes	Yes	Food and beverages	Small	10	1.33333	4	20	1.90476	1.42857	32	Male	Married	2	Graduate	Plant manager	white collar	2862	3	Yes	No	720	83	1.78	26.1962	Overweight	90.5	No	No	150	90	No	No	No	No	No	No	ELEVADA	0	0	0	Yes	No	Yes	3.39707	0.586914
2715	27	Yes	Yes	Food and beverages	Small	10	1.33333	4	20	1.90476	1.42857	53	Male	Married	3	Middle school	Manufacturing technician	white collar	1908	2	Yes	No	264	75.4	1.8	23.2716	Normal weight	92	No	No	150	100	No	No	No	No	No	No	ELEVADA	0	0	0	No	No	No	16.6342	8.11491
2716	27	Yes	Yes	Food and beverages	Small	10	1.33333	4	20	1.90476	1.42857	46	Male	Widower	3	Elementary school	Machine operator	white collar	937	0.98218	No	No	3177	59.3	1.5	26.3556	Overweight	91.3	No	No	130	80	No	No	No	No	No	No	ELEVADA	0	0	0	Yes	No	No	5.99568	2.04427
2717	27	Yes	Yes	Food and beverages	Small	10	1.33333	4	20	1.90476	1.42857	18	Male	Single	0	Elementary school	Production worker	blue collar	852	0.893082	No	No	4518	64	1.76	20.6612	Normal weight	75.1	No	No	110	70	No	No	No	No	No	No	NORMAL	0	0	0	No	No	No	0.157979	0.002329
2718	27	Yes	Yes	Food and beverages	Small	10	1.33333	4	7	1.86667	1.4	35	Female	Married	1	Middle school	Production worker	blue collar	937	0.98218	No	No	120	55	1.61	21.2183	Normal weight	77.5	No	No	100	70	No	No	No	No	No	No	NORMAL	0	0	0	No	No	No	0.566865	0.074954
2719	27	Yes	Yes	Food and beverages	Small	10	1.33333	4	20	1.90476	1.42857	48	Male	Married	5	Elementary school	Machine operator	white collar	937	0.98218	No	No	1000	80	1.57	32.4557	Obesity I	102.5	No	No	150	100	No	No	No	No	No	No	ELEVADA	0	0	0	No	No	No	9.33962	3.43304
2801	28	Yes	Yes	Non-metallic minerals	Small	13	2.5	5	3	3.75	1.5	30	Female	Married	1	Elementary school	Administrative assistant	white collar	1500	1.57233	No	No	1680	74.9	1.56	30.7774	Obesity I	91.9	No	No	110	70	Yes	Yes	Yes	No	Yes	No	NORMAL	1	1	1	Yes	Yes	Yes	2.87518	3.67852
2802	28	Yes	Yes	Non-metallic minerals	Small	13	2.5	5	27	2.93478	1.17391	44	Male	Married	2	Graduate	Production worker	blue collar	1200	1.25786	No	No	1191	70.2	1.7	24.2907	Normal weight	90.8	No	No	120	80	No	No	Yes	No	No	No	NORMAL	0	0	1	No	No	No	5.31938	1.77212
2803	28	Yes	Yes	Non-metallic minerals	Small	13	2.5	5	27	2.93478	1.17391	26	Male	Married	0	High-school	Production worker	blue collar	937	0.98218	No	No	480	87.8	1.67	31.4819	Obesity I	109.5	No	No	110	70	No	No	No	No	No	No	NORMAL	0	0	0	Yes	Yes	Yes	1.5395	0.412677
2804	28	Yes	No	Non-metallic minerals	Small	13	2.5	5	27	2.93478	1.17391	42	Male	Married	0	Elementary school	Production worker	blue collar	937	0.98218	No	No	1560	74.7	1.62	28.4636	Overweight	99.8	No	No	140	90	No	No	No	No	No	No	ELEVADA	0	0	0
2805	28	Yes	Yes	Non-metallic minerals	Small	13	2.5	5	27	2.93478	1.17391	36	Male	Married	3	Elementary school	Machine operator	blue collar	937	0.98218	No	No		90.3	1.73	30.1714	Obesity I	102	No	No	120	90	No	No	No	No	No	No	ELEVADA	0	0	0	Yes	Yes	Yes	9.23737	5.87035
2806	28	Yes	Yes	Non-metallic minerals	Small	13	2.5	5	27	2.93478	1.17391	30	Male	Married	0	Middle school	Machine operator	blue collar	937	0.98218	No	No	640	61.1	1.65	22.4426	Normal weight	76.7	No	No	110	80	No	No	No	No	No	No	ELEVADA	0	0	0	No	No	No	1.21179	0.139949
2807	28	Yes	Yes	Non-metallic minerals	Small	13	2.5	5	27	2.93478	1.17391	46	Male	Married	1	High-school	Production worker	blue collar	937	0.98218	No	No	2662	61.9	1.47	28.6455	Overweight	94.5	Yes	Yes	160	90	No	No	No	No	No	No	ELEVADA	0	0	0	Yes	Yes	No	15.3984	4.67412
2808	28	Yes	Yes	Non-metallic minerals	Small	13	2.5	5	27	2.93478	1.17391	21	Male	Married	0	Middle school	Production worker	blue collar	1100	1.15304	No	No	546	53.6	1.64	19.9286	Normal weight	68.1	No	No	120	80	No	No	No	No	No	No	NORMAL	0	0	0	No	No	No	0.473869	0.022145
2809	28	Yes	Yes	Non-metallic minerals	Small	13	2.5	5	27	2.93478	1.17391	40	Male	Single	0	Elementary school	Production worker	blue collar	937	0.98218	No	No	0	65.5	1.64	24.3531	Normal weight	94.5	No	No	130	80	No	No	No	No	No	No	ELEVADA	0	0	0	Yes	Yes	No	9.73123	4.41237
2810	28	Yes	Yes	Non-metallic minerals	Small	13	2.5	5	27	2.93478	1.17391	25	Male	Single	0	High-school	Production worker	blue collar	937	0.98218	No	No	1440	74.9	1.7	25.917	Overweight	92.8	Yes	No	120	80	No	No	No	No	No	No	NORMAL	0	0	0	No	No	No	1.16035	0.160421
2811	28	Yes	Yes	Non-metallic minerals	Small	13	2.5	5	27	2.93478	1.17391	42	Male	Married	2	Middle school	Production worker	blue collar	937	0.98218	No	Yes	480	82.5	1.65	30.303	Obesity I	109.5	No	No	120	80	No	No	No	No	No	No	NORMAL	0	0	0	Yes	Yes	Yes	10.3462	100
2812	28	Yes	Yes	Non-metallic minerals	Small	13	2.5	5	27	2.93478	1.17391	47	Male	Single	2	High-school	Plant manager	white collar	3816	4	Yes	No	528	108.9	1.72	36.8104	Obesity I	120.8	Yes	Yes	120	90	No	No	No	No	Yes	No	ELEVADA	0	0	0	Yes	Yes	Yes	9.90294	3.39842
2813	28	Yes	Yes	Non-metallic minerals	Small	13	2.5	5	27	2.93478	1.17391	31	Male	Married	1	High-school	Manufacturing technician	white collar	1431	1.5	No	No	760	79.3	1.65	29.1276	Overweight	95	No	No	120	80	No	No	No	No	No	No	NORMAL	0	0	0	Yes	Yes	No	3.09772	1.01677
2814	28	Yes	Yes	Non-metallic minerals	Small	13	2.5	5	3	3.75	1.5	37	Female	Single	1	Graduate	Manufacturing technician	white collar	2342.5	2.45545	Yes	No	1653	92	1.59	36.391	Obesity I	103.1	No	No	130	90	No	No	No	No	No	No	ELEVADA	0	0	0	Yes	Yes	Yes	2.42175	0.523926
2815	28	Yes	Yes	Non-metallic minerals	Small	13	2.5	5	27	2.93478	1.17391	26	Male	Married	2	Elementary school	Production worker	blue collar	937	0.98218	No	No	1920	64.5	1.67	23.1274	Normal weight	82	No	No	110	70	No	No	No	No	No	No	NORMAL	0	0	0	No	No	No	0.634848	0.038082
2816	28	Yes	No	Non-metallic minerals	Small	13	2.5	5	27	2.93478	1.17391	29	Male	Married	0	High-school	Administrative assistant	white collar	1100	1.15304	Yes	No	1080	64.5	1.74	21.304	Normal weight	83.8	No	No	120	80	No	No	No	No	No	No	NORMAL	0	0	0
2817	28	Yes	Yes	Non-metallic minerals	Small	13	2.5	5	27	2.93478	1.17391	40	Male	Married	1	Middle school	Production worker	blue collar	1000	1.04822	No	No	1440	65.1	1.67	23.3425	Normal weight	86	Yes	Yes	130	90	No	No	No	No	No	No	ELEVADA	0	0	0	No	No	No	4.11062	0.722324
2818	28	Yes	Yes	Non-metallic minerals	Small	13	2.5	5	27	2.93478	1.17391	29	Male	Married	1	Middle school	Production worker	blue collar	937	0.98218	No	No	2013	75.3	1.65	27.6584	Overweight	97	No	No	110	80	No	No	No	No	No	No	NORMAL	0	0	0	No	No	No	1.32717	0.155193
2819	28	Yes	Yes	Non-metallic minerals	Small	13	2.5	5	27	2.93478	1.17391	49	Male	Single	1	Elementary school	Machine operator	blue collar	937	0.98218	No	No	594	61.6	1.66	22.3545	Normal weight	80.3	No	No	120	70	No	No	No	No	No	No	NORMAL	0	0	0	No	No	No	8.26411	3.42898
2820	28	Yes	Yes	Non-metallic minerals	Small	13	2.5	5	27	2.93478	1.17391	30	Male	Married	0	Elementary school	Production worker	blue collar	937	0.98218	No	No	840	66.9	1.57	27.1411	Overweight	86.7	No	No	110	70	No	No	No	No	No	No	NORMAL	0	0	0	No	No	No	1.18146	0.126148
2821	28	Yes	Yes	Non-metallic minerals	Small	13	2.5	5	27	2.93478	1.17391	23	Male	Single	1	High-school	Production worker	blue collar	1450	1.51992	No	No	3840	67.5	1.7	23.3564	Normal weight	75.8	No	No	100	70	No	No	No	No	No	No	NORMAL	0	0	0	No	No	No	0.376288	0.017032
2822	28	Yes	Yes	Non-metallic minerals	Small	13	2.5	5	27	2.93478	1.17391	28	Male	Married	0	High-school	Administrative assistant	white collar	1100	1.15304	No	No	1920	61.2	1.66	22.2093	Normal weight	71.8	No	No	120	60	No	No	No	No	No	No	NORMAL	0	0	0	No	No	No	1.18272	0.112228
2823	28	Yes	Yes	Non-metallic minerals	Small	13	2.5	5	27	2.93478	1.17391	26	Male	Married	0	High-school	Production worker	blue collar	1500	1.57233	No	No	1200	72.2	1.79	22.5336	Normal weight	80	No	No	110	70	No	No	No	No	No	No	NORMAL	0	0	0	No	No	No	0.699289	0.048173
2824	28	Yes	Yes	Non-metallic minerals	Small	13	2.5	5	27	2.93478	1.17391	21	Male	Single	0	High-school	Production worker	blue collar	937	0.98218	No	No	960	55.1	1.71	18.8434	Normal weight	72.1	No	No	100	60	No	No	No	No	No	No	NORMAL	0	0	0	No	No	No	0.3282	0.015242
2825	28	Yes	Yes	Non-metallic minerals	Small	13	2.5	5	27	2.93478	1.17391	39	Male	Married	2	Elementary school	Production worker	blue collar	937	0.98218	No	No	1084	71.6	1.63	26.9487	Overweight	85.8	No	No	120	80	No	No	No	No	No	No	NORMAL	0	0	0	No	No	No	3.39212	0.772994
2901	29	No	Yes	Textile	Small	7	4.5	18	25	4.5	1	55	Female	Divorced	5	Elementary school	Production worker	blue collar	937	0.98218	No	No	880	60.7	1.48	27.5998	Overweight	95.7	No	No	110	70	No	No	Yes	No	Yes	No	NORMAL	0	0	1	Yes	Yes	Yes	6.9893	2.83273
2902	29	No	Yes	Textile	Small	7	4.5	18	25	4.5	1	37	Female	Married	1	High-school	Production worker	blue collar	937	0.98218	Yes	No	1760	80.5	1.64	29.7846	Overweight	90.9	No	No	120	90	No	No	No	No	No	No	ELEVADA	0	0	0	No	No	No	1.60372	0.340023
2903	29	No	Yes	Textile	Small	7	4.5	18	25	4.5	1	43	Female	Single	1	Middle school	Production worker	blue collar	937	0.98218	No	Yes	920	45	1.53	19.2234	Normal weight	72.1	No	No	120	90	No	No	No	No	No	No	ELEVADA	0	0	0	Yes	No	Yes	11.4043	13.46
2904	29	No	Yes	Textile	Small	7	4.5	18	25	4.5	1	53	Female	Married	2	Middle school	Production worker	blue collar	937	0.98218	No	Yes	330	61.6	1.54	25.974	Overweight	92	Yes	Yes	120	80	Yes	Yes	No	No	No	No	NORMAL	1	1	0	Yes	Yes	Yes	20.25	11.2236
2905	29	No	Yes	Textile	Small	7	4.5	18	25	4.5	1	35	Female	Single	4	Middle school	Production worker	blue collar	937	0.98218	No	No	200	78	1.59	30.8532	Obesity I	97.8	No	No	100	60	No	No	No	No	No	No	NORMAL	0	0	0	No	No	No	1.0859	0.432986
2906	29	No	Yes	Textile	Small	7	4.5	18	4	4.5	1	37	Male	Married	2	High-school	Plant manager	white collar	1908	2	No	No	990	85.8	1.79	26.8081	Overweight	96.6	No	No	120	80	No	No	No	No	No	No	NORMAL	0	0	0	No	No	No	2.57011	0.478539
2907	29	No	No	Textile	Small	7	4.5	18	25	4.5	1	40	Female	Married	2	Middle school	Production worker	blue collar	937	0.98218	No	No	2400	49.7	1.41	24.9987	Overweight	79.8	No	No	110	80	No	No	No	No	No	No	NORMAL	0	0	0
2908	29	No	Yes	Textile	Small	7	4.5	18	25	4.5	1	36	Female	Married	2	Graduate	Plant manager	white collar	937	0.98218	No	No	2400	72.2	1.59	28.7395	Overweight	83.3	No	No	130	80	No	No	No	No	Yes	No	ELEVADA	0	0	0	No	No	No	2.30372	0.570288
2909	29	No	Yes	Textile	Small	7	4.5	18	25	4.5	1	35	Female	Married	1	High-school	Production worker	blue collar	937	0.98218	Yes	No	840	42.7	1.44	20.736	Normal weight	69.3	No	No	100	70	No	No	No	No	No	No	NORMAL	0	0	0	No	No	No	0.898306	0.160747
2910	29	No	Yes	Textile	Small	7	4.5	18	25	4.5	1	33	Female	Married	3	High-school	Production worker	blue collar	937	0.98218	Yes	No	3120	52.4	1.5	23.196	Normal weight	75.6	No	No	80	60	No	No	No	No	No	No	NORMAL	0	0	0	No	No	No	0.551886	0.23471
2911	29	No	Yes	Textile	Small	7	4.5	18	25	4.5	1	49	Female	Married	2	Middle school	Production worker	blue collar	937	0.98218	No	No	4053	78.5	1.58	31.2867	Obesity I	114.5	No	No	140	90	No	No	No	No	No	No	ELEVADA	0	0	0	No	No	No	8.84634	2.20251
2912	29	No	Yes	Textile	Small	7	4.5	18	25	4.5	1	53	Female	Divorced	4	High-school	Production worker	blue collar	937	0.98218	Yes	Yes	1840	59.3	1.48	27.1828	Overweight	90.1	No	No	110	70	No	No	No	No	No	No	NORMAL	0	0	0	No	No	No	8.66147	5.33777
2913	29	No	Yes	Textile	Small	7	4.5	18	25	4.5	1	57	Female	Married	7	Elementary school	Production worker	blue collar	937	0.98218	No	No	505	84.8	1.52	36.9463	Obesity I	106.3	Yes	Yes	130	80	Yes	Yes	Yes	Yes	No	No	ELEVADA	1	1	1	Yes	Yes	Yes	21.8819	9.3254
2914	29	No	No	Textile	Small	7	4.5	18	25	4.5	1	31	Female	Single	3	High-school	Production worker	blue collar	937	0.98218	No	No	3360	69.3	1.59	27.5851	Overweight	94	Yes	Yes	120	80	No	No	No	No	No	No	NORMAL	0	0	0
2915	29	No	Yes	Textile	Small	7	4.5	18	25	4.5	1	40	Female	Single	1	Middle school	Production worker	blue collar	937	0.98218	Yes	No	2514	74.3	1.58	29.6127	Overweight	94.4	No	No	120	80	No	No	No	No	No	No	NORMAL	0	0	0	No	No	No	2.7222	0.590776
2916	29	No	Yes	Textile	Small	7	4.5	18	25	4.5	1	44	Female	Married	2	Elementary school	Production worker	blue collar	937	0.98218	No	No	840	57.3	1.53	24.6385	Normal weight	79.5	No	No	110	75	No	No	No	No	No	No	NORMAL	0	0	0	No	No	No	1.53645	0.270098
2917	29	No	Yes	Textile	Small	7	4.5	18	25	4.5	1	24	Female	Married	0	High-school	Production worker	blue collar	937	0.98218	No	No	330	85.7	1.69	30.006	Obesity I	100	No	No	110	70	No	No	Yes	No	No	No	NORMAL	0	0	1	No	No	No	0.62901	1.14282
2918	29	No	Yes	Textile	Small	7	4.5	18	25	4.5	1	65	Female	Married	6	Elementary school	Production worker	blue collar	937	0.98218	No	No	0	71.2	1.53	30.5353	Obesity I	99.5	Yes	Yes	150	90	No	No	Yes	Yes	Yes	No	ELEVADA	0	0	1	Yes	Yes	Yes	17.7876	10.6855
2919	29	No	Yes	Textile	Small	7	4.5	18	4	4.5	1	49	Male	Married	1	Elementary school	Production worker	blue collar	937	0.98218	No	No	0	62.4	1.56	25.641	Overweight	93.8	No	No	130	100	No	No	Yes	No	Yes	No	ELEVADA	0	0	1	Yes	No	Yes	11.1225	4.93424
2920	29	No	Yes	Textile	Small	7	4.5	18	25	4.5	1	39	Female	Married	1	High-school	Manufacturing technician	white collar	1004	1.05241	No	No	2580	93.7	1.59	37.0634	Obesity I	106.5	Yes	Yes	120	80	No	No	No	No	No	No	NORMAL	0	0	0	Yes	Yes	Yes	2.95226	0.977784
2921	29	No	Yes	Textile	Small	7	4.5	18	4	4.5	1	24	Male	Married	1	Middle school	Production worker	blue collar	1431	1.5	No	No	0	52.4	1.65	19.247	Normal weight	71	No	No	120	80	No	No	No	No	No	No	NORMAL	0	0	0	No	No	No	0.549369	0.025837
2922	29	No	No	Textile	Small	7	4.5	18	25	4.5	1	28	Female	Married	0	Graduate	Machine operator	white collar	937	0.98218	No	No	660	45.7	1.5	20.3111	Normal weight	66.8	No	No	100	60	No	No	Yes	No	No	No	NORMAL	0	0	1
2923	29	No	Yes	Textile	Small	7	4.5	18	25	4.5	1	59	Female	Divorced	2	Elementary school	Machine operator	blue collar	937	0.98218	No	No	1710	64.1	1.52	27.7441	Overweight	98	Yes	Yes	160	100	No	No	Yes	Yes	No	No	ELEVADA	0	0	1	Yes	Yes	Yes	21.7345	7.67603
2924	29	No	No	Textile	Small	7	4.5	18	25	4.5	1	52	Female	Single	5	High-school	Machine operator	white collar	937	0.98218	No	No	2475	50.6	1.48	23.2262	Normal weight	85.7	No	No	120	80	No	No	Yes	No	No	No	NORMAL	0	0	1
2925	29	No	Yes	Textile	Small	7	4.5	18	25	4.5	1	29	Female	Married	1	High-school	Production worker	blue collar	937	0.98218	No	No	1080	75.7	1.54	32.1277	Obesity I	99.8	No	No	120	90	No	No	No	No	No	No	ELEVADA	0	0	0	Yes	Yes	Yes	1.02223	0.362858
2926	29	No	Yes	Textile	Small	7	4.5	18	25	4.5	1	28	Female	Married	1	High-school	Production worker	blue collar	937	0.98218	No	No	3360	52.3	1.46	24.4017	Normal weight	78.4	No	No	100	70	No	No	No	No	No	No	NORMAL	0	0	0	No	No	No	0.652307	0.408843
2927	29	No	Yes	Textile	Small	7	4.5	18	25	4.5	1	22	Female	Single	0	High-school	Production worker	blue collar	937	0.98218	No	No	840	51.3	1.61	19.7909	Normal weight	68.5	No	No	120	80	No	No	No	No	No	No	NORMAL	0	0	0	No	No	No	0.540492	1.4488
2928	29	No	Yes	Textile	Small	7	4.5	18	25	4.5	1	42	Female	Single	0	Middle school	Production worker	blue collar	937	0.98218	No	No	0	66.1	1.53	28.4225	Overweight	91.3	No	No	120	80	No	No	No	No	No	No	NORMAL	0	0	0	No	No	No	2.1352	0.402127
2929	29	No	Yes	Textile	Small	7	4.5	18	4	4.5	1	35	Male	Married	2	High-school	Manufacturing technician	white collar	1200	1.25786	Yes	No	247.5	74.3	1.73	24.8829	Normal weight	89.5	No	No	120	70	No	No	No	No	No	No	NORMAL	0	0	0	No	No	No	2.48646	0.468937
3001	30	No	Yes	Non-metallic minerals	Medium	5	5	5	258	53.75	10.75	27	Male	Married	1	High-school	Machine operator	blue collar	1800	1.92102	Yes	Yes	1800	67.1	1.68	23.7741	Normal weight	82.8	No	Yes	140	100	No	No	No	No	Yes	No	ELEVADA	0	0	0	No	No	No	3.7014	98.296
3002	30	No	Yes	Non-metallic minerals	Medium	5	5	5	258	53.75	10.75	43	Male	Married	2	High-school	Food processing worker	blue collar	1600	1.70758	No	No	480	73.5	1.62	28.1801	Overweight	101.1	No	No	130	80	No	No	Yes	No	No	No	ELEVADA	0	0	1	Yes	Yes	No	9.1028	3.58387
3003	30	No	No	Non-metallic minerals	Medium	5	5	5	258	53.75	10.75	49	Male	Divorced	2	Graduate	Manufacturing technician	white collar	937	1	Yes	No	2772	85	1.74	28.2371	Overweight	104.6	No	No	130	90	No	No	No	No	No	No	ELEVADA	0	0	0
3004	30	No	Yes	Non-metallic minerals	Medium	5	5	5	258	53.75	10.75	19	Male	Single	0	High-school	Production worker	blue collar	937	1	No	No	693	64.9	1.68	22.9946	Normal weight	79.8	No	No	130	70	No	No	No	No	No	No	ELEVADA	0	0	0	No	No	No	0.206226	0.001743
3005	30	No	Yes	Non-metallic minerals	Medium	5	5	5	12	20	4	29	Female	Single	0	High-school	Food processing worker	blue collar	937	1	No	No	2866.5	80.7	1.66	29.2858	Overweight	100.5	No	No	120	70	No	No	No	No	No	No	NORMAL	0	0	0	No	No	No	0.936188	0.469067
3006	30	No	Yes	Non-metallic minerals	Medium	5	5	5	258	53.75	10.75	29	Male	Single	0	Middle school	Production worker	blue collar	937	1	No	No	0	83.5	1.61	32.2133	Obesity I	100	No	No	120	70	No	No	No	No	No	No	NORMAL	0	0	0	Yes	Yes	No	1.75403	0.304104
3007	30	No	Yes	Non-metallic minerals	Medium	5	5	5	258	53.75	10.75	45	Male	Married	9	Elementary school	Production worker	blue collar	937	1	No	Yes	0	84.5	1.66	30.6648	Obesity I	106.5	No	No	120	80	No	No	No	No	No	No	NORMAL	0	0	0	Yes	Yes	Yes	18.6522	100
3008	30	No	No	Non-metallic minerals	Medium	5	5	5	258	53.75	10.75	28	Male	Single	0	High-school	Manufacturing technician	blue collar	937	1	No	No	118.8	73.9	1.7	25.5709	Overweight	87.3	No	No	110	80	No	No	No	No	No	No	NORMAL	0	0	0
3009	30	No	No	Non-metallic minerals	Medium	5	5	5	258	53.75	10.75	41	Male	Single	2	Elementary school	Production worker	blue collar	937	1	No	No	165	69.3	1.67	24.8485	Normal weight	85	No	No	110	80	No	No	No	No	No	No	NORMAL	0	0	0
3010	30	No	Yes	Non-metallic minerals	Medium	5	5	5	258	53.75	10.75	48	Male	Married	3	High-school	Production worker	blue collar	1802	1.92316	No	No	0	75.1	1.78	23.7028	Normal weight	91.3	No	No	120	80	No	No	No	No	No	No	NORMAL	0	0	0	No	No	No	7.45873	2.97504
3011	30	No	No	Non-metallic minerals	Medium	5	5	5	258	53.75	10.75	35	Male	Married	2	Middle school	Production worker	blue collar	937	1	No	No	480	94.9	1.79	29.6183	Overweight	105	Yes	No	150	90	No	No	No	No	No	No	ELEVADA	0	0	0
3012	30	No	Yes	Non-metallic minerals	Medium	5	5	5	258	53.75	10.75	52	Male	Divorced	5	Elementary school	Manufacturing technician	white collar	1431	1.52721	No	Yes	594	67.9	1.71	23.3572	Normal weight	85.8	No	No	130	80	No	No	No	No	No	No	ELEVADA	0	0	0	No	No	No	13.3292	100
3013	30	No	No	Non-metallic minerals	Medium	5	5	5	258	53.75	10.75	21	Male	Single	0	High-school	Production worker	blue collar	1100	1.17396	No	No	0	75.6	1.77	24.131	Normal weight	85.6	No	No			No	No	No	No	No	No		0	0	0
3014	30	No	Yes	Non-metallic minerals	Medium	5	5	5	12	20	4	37	Female	Married	3	Middle school	Machine operator	blue collar	966	1.03095	No	No	3360	95.4	1.52	41.2915	Obesity III	119.5	Yes	Yes	120	80	No	No	Yes	No	Yes	No	NORMAL	0	0	1	Yes	Yes	Yes	3.47802	1.66658
3015	30	No	Yes	Non-metallic minerals	Medium	5	5	5	12	20	4	39	Female	Married	1	Elementary school	Food processing worker	blue collar	937	1	No	No	3360	78.5	1.45	37.3365	Obesity I	106.9	No	No	120	80	No	No	No	No	No	No	NORMAL	0	0	0	Yes	Yes	Yes	2.66334	1.05846
3016	30	No	Yes	Non-metallic minerals	Medium	5	5	5	258	53.75	10.75	34	Male	Married	1	Middle school	Production worker	blue collar	937	1	No	No	0	95.6	1.65	35.1148	Obesity I	114.2	No	No	130	90	No	No	No	No	No	No	ELEVADA	0	0	0	Yes	Yes	Yes	4.26718	1.26891
3017	30	No	No	Non-metallic minerals	Medium	5	5	5	258	53.75	10.75	35	Male	Married	2	Middle school	Production worker	blue collar	1431	1.52721	No	No	240	81	1.8	25	Overweight	93.5	No	No	140	80	No	No	No	No	No	No	ELEVADA	0	0	0
3018	30	No	No	Non-metallic minerals	Medium	5	5	5	258	53.75	10.75	45	Male	Married	1	Graduate	Production worker	blue collar	1500	1.60085	Yes	No	0	75.7	1.75	24.7184	Normal weight	99.8	No	No	110	80	No	No	No	No	No	No	NORMAL	0	0	0
3019	30	No	Yes	Non-metallic minerals	Medium	5	5	5	258	53.75	10.75	27	Male	Married	0	High-school	Manufacturing technician	white collar	1800	1.92102	Yes	No	2358	56.3	1.54	23.7392	Normal weight	76.9	No	No	100	60	No	No	No	No	No	No	NORMAL	0	0	0	No	No	No	0.84258	0.112675
3020	30	No	Yes	Non-metallic minerals	Medium	5	5	5	258	53.75	10.75	24	Male	Married	0	High-school	Production worker	blue collar	937	1	No	No	480	63.2	1.65	23.3553	Normal weight	82.1	No	No	120	80	No	No	No	No	No	No	NORMAL	0	0	0	No	No	No	0.82455	0.070344
3021	30	No	Yes	Non-metallic minerals	Medium	5	5	5	258	53.75	10.75	20	Male	Single	0	High-school	Manufacturing technician	white collar	1300	1.38741	No	No	0	58.7	1.69	20.5525	Normal weight	73.3	No	No	130	80	No	No	No	No	No	No	ELEVADA	0	0	0	No	No	No	0.356414	0.008924
3022	30	No	Yes	Non-metallic minerals	Medium	5	5	5	258	53.75	10.75	35	Male	Married	1	Elementary school	Production worker	blue collar	1908	2.03629	No	No	1680	60.4	1.73	20.1811	Normal weight	81.5	No	No	130	90	No	No	No	No	No	No	ELEVADA	0	0	0	No	No	No	2.62717	0.475674
3023	30	No	Yes	Non-metallic minerals	Medium	5	5	5	258	53.75	10.75	42	Male	Single	0	Elementary school	Production worker	blue collar	937	1	No	No	0	59.6	1.58	23.8744	Normal weight	78.4	No	No	100	60	No	No	No	No	No	No	NORMAL	0	0	0	No	No	No	2.21845	0.499006
3024	30	No	Yes	Non-metallic minerals	Medium	5	5	5	258	53.75	10.75	45	Male	Married	1	Middle school	Food processing worker	blue collar	1200	1.28068	No	No	1320	75	1.62	28.578	Overweight	101.1	No	No	130	90	No	No	No	No	No	No	ELEVADA	0	0	0	Yes	Yes	No	7.58089	2.82504
3025	30	No	Yes	Non-metallic minerals	Medium	5	5	5	258	53.75	10.75	21	Male	Married	1	High-school	Production worker	blue collar	937	1	No	No	0	71	1.71	24.281	Normal weight	78.5	No	No			Yes	No	No	No	No	No		1	0	0	No	No	No		4e-08
3026	30	No	Yes	Non-metallic minerals	Medium	5	5	5	258	53.75	10.75	48	Male	Single	3	Middle school	Manufacturing technician	white collar	3000	3.20171	No	No	400	81.4	1.77	25.9823	Overweight	91.6	No	No	120	80	No	No	No	No	No	No	NORMAL	0	0	0	No	No	No	10.8804	4.94371
3027	30	No	Yes	Non-metallic minerals	Medium	5	5	5	258	53.75	10.75	30	Male	Single	0	High-school	Production worker	blue collar	937	1	No	No	1386	66.4	1.7	22.9758	Normal weight	82	No	No	120	80	No	No	No	No	No	No	NORMAL	0	0	0	No	No	No	1.48965	0.189825
3101	31	Yes	Yes	Textile	Small	16	1.33333	4	48	4	3	32	Female	Married	0	Graduate	Administrative assistant	white collar	937	1	Yes	No	3240	59.6	1.56	24.4905	Normal weight	83.4	No	No	110	70	No	No	No	No	No	No	NORMAL	0	0	0	No	No	No	1.6843	1.66042
3102	31	Yes	Yes	Textile	Small	16	1.33333	4	48	4	3	28	Female	Single	0	High-school	Administrative assistant	white collar	1000	1.06724	No	No	1600	62.7	1.59	24.8012	Normal weight	80	No	No	120	80	No	No	No	No	No	No	NORMAL	0	0	0	No	No	No	0.787881	0.244964
3103	31	Yes	Yes	Textile	Small	16	1.33333	4	48	4	3	34	Female	Married	2	Middle school	Food processing worker	blue collar	937	1	No	No	1455	76.8	1.56	31.5582	Obesity I	98.3	Yes	Yes	140	80	No	No	Yes	No	No	No	ELEVADO	0	0	1	Yes	Yes	Yes	4.66841	3.19724
3104	31	Yes	Yes	Textile	Small	16	1.33333	4	51	11.3333	8.5	52	Male	Married	3	Elementary school	Food processing worker	blue collar	937	1	No	Yes	2091	79.5	1.63	29.9221	Overweight	97.8	No	No	110	80	No	No	No	No	No	No	NORMAL	0	0	0	Yes	Yes	No	20.164	100
3105	31	Yes	Yes	Textile	Small	16	1.33333	4	48	4	3	38	Female	Married	3	Middle school	Production worker	blue collar	937	1	No	No	5450	72	1.51	31.5776	Obesity I	100.1	Yes	Yes	110	70	No	No	No	No	No	No	NORMAL	0	0	0	Yes	Yes	Yes	2.09293	0.809689
3106	31	Yes	Yes	Textile	Small	16	1.33333	4	48	4	3	22	Female	Married	0	High-school	Production worker	blue collar	937	1	No	No	3360	56.4	1.53	24.0933	Normal weight	78.3	No	No	120	90	No	No	No	No	No	No	ELEVADA	0	0	0	No	No	No	0.332873	0.108494
3107	31	Yes	Yes	Textile	Small	16	1.33333	4	51	11.3333	8.5	54	Male	Single	5	Middle school	Production worker	blue collar	1800	1.92102	Yes	No	4440	75.8	1.62	28.8828	Overweight	96.4	No	No	120	80	No	No	No	No	No	No	NORMAL	0	0	0	No	No	No	8.10128	3.9992
3108	31	Yes	Yes	Textile	Small	16	1.33333	4	48	4	3	37	Female	Married	0	Middle school	Production worker	blue collar	937	1	No	No	660	63.2	1.58	25.3165	Overweight	85.3	No	No	120	80	No	No	No	No	No	No	NORMAL	0	0	0	Yes	Yes	No	1.94397	0.567097
3109	31	Yes	Yes	Textile	Small	16	1.33333	4	51	11.3333	8.5	30	Male	Married	0	Graduate	Administrative assistant	white collar	937	1	No	No	800	63.9	1.61	24.6518	Normal weight	86.5	No	No	100	70	No	No	No	No	No	No	NORMAL	0	0	0	No	No	No	0.708861	0.056388
3110	31	Yes	Yes	Textile	Small	16	1.33333	4	51	11.3333	8.5	43	Male	Single	4	Middle school	Machine operator	blue collar	1431	1.52721	No	No	1920	57.1	1.61	22.0285	Normal weight	76.8	No	No	120	70	No	No	No	No	No	No	NORMAL	0	0	0	No	No	No	3.74489	1.02742
3111	31	Yes	Yes	Textile	Small	16	1.33333	4	48	4	3	43	Female	Married	0	Middle school	Production worker	blue collar	937	1	No	No	1977	70.9	1.59	28.0448	Overweight	90.5	No	No	110	70	No	No	No	No	No	No	NORMAL	0	0	0	No	No	No	2.24581	0.62056
3112	31	Yes	Yes	Textile	Small	16	1.33333	4	48	4	3	28	Female	Married	1	High-school	Production worker	white collar	937	1	No	No	990	80	1.52	34.626	Obesity I	103.6	No	No	120	80	No	No	No	No	No	No	NORMAL	0	0	0	No	No	No	0.671547	0.115796
3113	31	Yes	Yes	Textile	Small	16	1.33333	4	48	4	3	59	Female	Single	0	Middle school	Production worker	blue collar	937	1	No	No	775.5	61.2	1.45	29.1082	Overweight	94	No	No	110	70	Yes	No	No	No	No	No	NORMAL	1	0	0	No	No	Yes	6.7765	3.47003
3114	31	Yes	Yes	Textile	Small	16	1.33333	4	48	4	3	32	Female	Married	0	High-school	Production worker	blue collar	937	1	No	No	3360	58.8	1.52	25.4501	Overweight	80.9	No	No	110	70	No	No	No	No	No	No	NORMAL	0	0	0	No	No	No	1.11065	0.386176
3115	31	Yes	Yes	Textile	Small	16	1.33333	4	48	4	3	32	Female	Married	1	High-school	Machine operator	blue collar	937	1	No	No	1398	62.5	1.59	24.7221	Normal weight	82	No	No	90	70	No	No	No	No	No	No	NORMAL	0	0	0	No	No	No	0.486307	0.175087
3116	31	Yes	Yes	Textile	Small	16	1.33333	4	48	4	3	30	Female	Married	2	Middle school	Machine operator	blue collar	937	1	No	No	7440	61.6	1.62	23.472	Normal weight	82.9	No	No	110	70	No	No	No	No	No	No	NORMAL	0	0	0	Yes	Yes	No	0.905317	0.417627
3117	31	Yes	Yes	Textile	Small	16	1.33333	4	48	4	3	36	Female	Single	0	High-school	Production worker	blue collar	937	1	Yes	No	675	62.4	1.58	24.996	Normal weight	86.4	No	No	120	80	No	No	No	No	No	No	NORMAL	0	0	0	No	No	No	1.72014	0.421756
3118	31	Yes	Yes	Textile	Small	16	1.33333	4	48	4	3	48	Female	Married	0	High-school	Production worker	blue collar	937	1	No	No	2888.5	66.2	1.63	24.9163	Normal weight	79	Yes	Yes	110	90	No	No	No	No	No	No	ELEVADO	0	0	0	Yes	No	No	2.80475	0.687391
3119	31	Yes	No	Textile	Small	16	1.33333	4	48	4	3	32	Female	Married	1	High-school	Production worker	blue collar	937	1	No	No	2880	59.9	1.46	28.101	Overweight	84.2	No	No	100	60	No	No	Yes	No	No	No	NORMAL	0	0	1
3120	31	Yes	No	Textile	Small	16	1.33333	4	48	4	3	34	Female	Married	3	Middle school	Production worker	white collar	937	1	No	No	1680	85.3	1.59	33.7408	Obesity I	98.6	Yes	No	120	80	No	No	No	No	No	No	NORMAL	0	0	0
3121	31	Yes	No	Textile	Small	16	1.33333	4	51	11.3333	8.5	45	Male	Married	2	Graduate	Manufacturing technician	white collar	2800	2.98826	Yes	No	1554	85.8	1.72	29.0022	Overweight	99	No	No	120	80	No	No	No	No	Yes	No	NORMAL	0	0	0
3122	31	Yes	No	Textile	Small	16	1.33333	4	51	11.3333	8.5	27	Male	Single	1	Graduate	Manufacturing technician	white collar	1769	1.88794	Yes	No	323.75	99.5	1.69	34.8377	Obesity I	111.3	No	No	120	70	No	No	No	No	No	No	NORMAL	0	0	0
3201	32	Yes	Yes	Textile	Medium	17	2	8	85	14.1667	7.08333	46	Male	Married	2	Graduate	Food processing worker	blue collar	937	1	No	No	900	67.1	1.7	23.218	Normal weight	89.2	No	No	110	80	No	No	No	No	No	No	NORMAL	0	0	0	No	No	No	5.95223	2.35602
3202	32	Yes	Yes	Textile	Medium	17	2	8	85	14.1667	7.08333	51	Male	Married	2	Middle school	Machine operator	blue collar	1431	1.52721	No	No	280	86.1	1.67	31.0581	Obesity I	113.4	Yes	Yes	120	80	No	No	No	No	No	No	NORMAL	0	0	0	Yes	Yes	Yes	16.6441	6.95512
3203	32	Yes	Yes	Textile	Medium	17	2	8	85	14.1667	7.08333	52	Male	Married	1	Middle school	Machine operator	blue collar	1300	1.38741	No	No	1950	92.2	1.62	35.1318	Obesity I	105.8	No	No	130	90	No	No	No	No	No	No	ELEVADA	0	0	0	Yes	Yes	Yes	12.0328	5.5969
3204	32	Yes	Yes	Textile	Medium	17	2	8	85	14.1667	7.08333	31	Male	Married	1	High-school	Production worker	blue collar	937	1	No	No	0	82.4	1.71	28.1796	Overweight	94.2	No	No	110	80	No	No	No	No	No	No	NORMAL	0	0	0	No	No	No	1.1772	0.133049
3205	32	Yes	Yes	Textile	Medium	17	2	8	101	18.3636	9.18182	57	Female	Divorced	4	Elementary school	Production worker	blue collar	937	1	No	No	960	53.7	1.48	24.6826	Normal weight	86.3	No	No	100	70	No	No	No	No	No	No	NORMAL	0	0	0	Yes	Yes	No	5.378	2.60483
3206	32	Yes	Yes	Textile	Medium	17	2	8	85	14.1667	7.08333	43	Male	Married	3	Middle school	Machine operator	blue collar	1500	1.60085	No	No	480	91.5	1.73	30.5724	Obesity I	98.5	No	No	110	80	No	No	No	No	No	No	NORMAL	0	0	0	Yes	Yes	No	4.37822	1.40673
3207	32	Yes	Yes	Textile	Medium	17	2	8	85	14.1667	7.08333	31	Male	Married	2	Elementary school	Production worker	blue collar	1000	1.06724	No	No	840	75.6	1.6	29.5313	Overweight	98.3	No	No	120	80	No	No	No	No	No	No	NORMAL	0	0	0	No	No	No	1.02445	0.08158
3208	32	Yes	Yes	Textile	Medium	17	2	8	101	18.3636	9.18182	45	Female	Single	3	High-school	Production worker	blue collar	937	1	No	No	2040	69.7	1.69	24.4039	Normal weight	92	Yes	Yes	120	80	No	No	No	No	No	No	NORMAL	0	0	0	Yes	Yes	Yes	4.01041	1.13901
3209	32	Yes	Yes	Textile	Medium	17	2	8	85	14.1667	7.08333	31	Male	Married	0	High-school	Plant manager	white collar	1431	1.52721	Yes	No	4260	69	1.65	25.3444	Overweight	84.3	No	No	120	80	No	No	No	No	No	No	NORMAL	0	0	0	No	No	No	2.52996	0.652103
3210	32	Yes	Yes	Textile	Medium	17	2	8	85	14.1667	7.08333	41	Male	Married	3	Middle school	Plant manager	white collar	1431	1.52721	No	No	2820	90.4	1.71	31.0971	Obesity I	104.3	No	No	110	70	No	No	No	No	No	No	NORMAL	0	0	0	No	No	No	2.87117	0.728728
3211	32	Yes	Yes	Textile	Medium	17	2	8	85	14.1667	7.08333	42	Male	Married	1	Middle school	Machine operator	white collar	1200	1.28068	No	No	240	89.9	1.82	27.1404	Overweight	92.5	No	No	120	80	No	No	Yes	No	No	No	NORMAL	0	0	1	No	No	No	3.53557	0.934039
3212	32	Yes	Yes	Textile	Medium	17	2	8	101	18.3636	9.18182	47	Female	Single	1	High-school	Production worker	blue collar	937	1	No	No	2026.5	72.2	1.64	26.8441	Overweight	101.3	No	No	110	70	No	No	No	No	No	No	NORMAL	0	0	0	No	No	No	1.79948	0.464077
3213	32	Yes	Yes	Textile	Medium	17	2	8	85	14.1667	7.08333	45	Male	Married	8	Middle school	Machine operator	blue collar	1200	1.28068	No	No	500	60.8	1.54	25.804	Overweight	85.3	No	No	110	70	No	No	No	No	No	No	NORMAL	0	0	0	No	No	No	3.01864	0.847135
3214	32	Yes	Yes	Textile	Medium	17	2	8	101	18.3636	9.18182	42	Female	Single	0	Middle school	Production worker	blue collar	937	1	No	No	960	65.4	1.53	28.1215	Overweight	96	No	No	120	80	No	No	No	No	No	No	NORMAL	0	0	0	No	No	No	2.89189	1.00824
3215	32	Yes	Yes	Textile	Medium	17	2	8	101	18.3636	9.18182	31	Female	Married	1	High-school	Production worker	blue collar	937	1	No	No	1120	87	1.62	33.356	Obesity I	100.2	No	No	120	80	No	No	No	No	No	No	NORMAL	0	0	0	No	No	No	0.917735	0.27976
3216	32	Yes	Yes	Textile	Medium	17	2	8	85	14.1667	7.08333	21	Male	Single	0	Graduate	Manufacturing technician	white collar	2385	2.54536	Yes	No	1722	94.9	1.76	30.8114	Obesity I	95.3	No	No	110	70	No	No	No	No	No	No	NORMAL	0	0	0	No	No	No	0.352417	0.01392
3217	32	Yes	Yes	Textile	Medium	17	2	8	85	14.1667	7.08333	30	Male	Married	1	Graduate	Administrative assistant	blue collar	2100	2.2412	No	No	0	81.9	1.82	24.7253	Normal weight	90.8	No	No	130	80	No	No	No	No	No	No	ELEVADA	0	0	0	No	No	No	1.52567	0.152688
3218	32	Yes	Yes	Textile	Medium	17	2	8	101	18.3636	9.18182	19	Female	Single	0	High-school	Administrative assistant	white collar	937	1	No	No	480	50.3	1.52	21.7711	Normal weight	70.3	No	No	120	80	No	No	No	No	No	No	NORMAL	0	0	0	No	No	No	0.302355	0.41285
3219	32	Yes	Yes	Textile	Medium	17	2	8	101	18.3636	9.18182	52	Female	Married	2	Elementary school	Machine operator	blue collar	937	1	No	No	5394	79.7	1.55	33.1738	Obesity I	101.3	No	No	120	80	No	No	Yes	Yes	No	No	NORMAL	0	0	1	Yes	Yes	Yes	5.94627	2.12344
3220	32	Yes	No	Textile	Medium	17	2	8	101	18.3636	9.18182	26	Female	Married	0	Graduate	Administrative assistant	white collar	1908	2.03629	Yes	No	3600	64.5	1.57	26.1674	Overweight	84.9	No	No	120	80	No	No	No	No	No	No	NORMAL	0	0	0
3221	32	Yes	No	Textile	Medium	17	2	8	101	18.3636	9.18182	36	Female	Married	3	High-school	Production worker	blue collar	937	1	No	No	1514	75.1	1.57	30.4678	Obesity I	96.1	No	No	110	80	No	No	No	No	No	No	NORMAL	0	0	0
3222	32	Yes	Yes	Textile	Medium	17	2	8	101	18.3636	9.18182	28	Female	Single	0	Graduate	Administrative assistant	white collar	1800	1.92102	Yes	No	2940	78.1	1.67	28.0039	Overweight	88.5	No	No	120	80	No	No	No	No	No	No	NORMAL	0	0	0	No	No	No	0.834512	0.19762
3223	32	Yes	Yes	Textile	Medium	17	2	8	101	18.3636	9.18182	35	Female	Married	1	Middle school	Production worker	blue collar	937	1	No	No	2175	61	1.61	23.6799	Normal weight	84.6	No	No	110	70	No	No	No	No	No	No	NORMAL	0	0	0	No	No	No	1.26909	0.37804
3301	33	No	Yes	Food and beverages	Medium	2	2	6	105	9.54546	4.77273	20	Male	Single	0	Middle school	Manufacturing technician	white collar	1110	1.16352	No		2400	81	1.82	24.5885	Normal weight	84.6	No	No	120	70	No	No	No	No	No	No	NORMAL	0	0	0	No	No	No	0.300641	0.006648
3302	33	No	Yes	Food and beverages	Medium	2	2	6	16	16	8	25	Female	Single	0	High-school	Plant manager	white collar	954	1	No		1653	77.3	1.63	29.0941	Overweight	95.6	No	No	120	80	No	No	No	No	No	No	NORMAL	0	0	0	Yes	Yes	Yes	0.68523	0.475189
3303	33	No	Yes	Food and beverages	Medium	2	2	6	105	9.54546	4.77273	21	Male	Single	0	High-school	Administrative assistant	white collar	954	1	No		360	48.4	1.58	19.5112	Normal weight	73.1	No	No	110	80	No	No	No	No	No	No	NORMAL	0	0	0	No	No	No	0.277706	0.006671
3304	33	No	Yes	Food and beverages	Medium	2	2	6	105	9.54546	4.77273	32	Male	Married	1	Post graduate	Administrative assistant	white collar	2862	3	Yes		0	70	1.76	22.5981	Normal weight	79.9	No	No	120	90	No	No	No	No	No	No	ELEVADA	0	0	0	No	No	No	2.29838	0.512802
3305	33	No	Yes	Food and beverages	Medium	2	2	6	105	9.54546	4.77273	30	Male	Married	1	High-school	Manufacturing technician	white collar	954	1	No		1359	60	1.67	21.5139	Normal weight	72.7	No	No	120	80	No	No	No	No	No	No	NORMAL	0	0	0	No	No	No	1.07984	0.093783
3306	33	No	Yes	Food and beverages	Medium	2	2	6	105	9.54546	4.77273	20	Male	Married	1	High-school	Manufacturing technician	white collar	954	1	No		1380	111.3	1.83	33.2348	Obesity I	112.6	No	No	140	60	No	No	No	No	No	No	ELEVADA	0	0	0	Yes	Yes	Yes	0.73777	0.054287
3307	33	No	Yes	Food and beverages	Medium	2	2	6	105	9.54546	4.77273	49	Male	Married	2	Elementary school	Manufacturing technician	white collar	1908	2	No		0	53.7	1.59	21.2412	Normal weight	74	No	No	120	70	No	No	Yes	No	Yes	No	NORMAL	0	0	1	No	No	No	8.64175	3.74632
3308	33	No	Yes	Food and beverages	Medium	2	2	6	105	9.54546	4.77273	28	Male	Married	1	High-school	Manufacturing technician	white collar	954	1	No		0	74	1.72	25.0135	Overweight	84.8	No	No	120	80	No	No	No	No	No	No	NORMAL	0	0	0	No	No	No	1.07042	0.095277
3309	33	No	Yes	Food and beverages	Medium	2	2	6	105	9.54546	4.77273	33	Male	Single	2	Middle school	Production worker	blue collar	954	1	No		1200	77.8	1.68	27.5652	Overweight	96.4	No	No	120	90	No	No	No	No	No	No	ELEVADA	0	0	0	Yes	Yes	No	2.26261	0.403905
3310	33	No	Yes	Food and beverages	Medium	2	2	6	105	9.54546	4.77273	29	Male	Married	1	Elementary school	Manufacturing technician	white collar	954	1	No		480	53.4	1.76	17.3375	Underweight	71.5	No	No	120	80	No	No	No	No	No	No	NORMAL	0	0	0	No	No	No	0.677669	0.030855
3311	33	No	Yes	Food and beverages	Medium	2	2	6	105	9.54546	4.77273	22	Male	Single	0	High-school	Manufacturing technician	white collar	954	1	No		1388	64.2	1.75	20.9633	Normal weight	73.6	No	No	130	90	No	No	No	No	No	No	ELEVADA	0	0	0	No	No	No	0.521207	0.018881
3312	33	No	Yes	Food and beverages	Medium	2	2	6	105	9.54546	4.77273	33	Male	Single	0	Middle school	Manufacturing technician	white collar	1100	1.15304	No		750	83	1.68	29.4076	Overweight	95	No	No	140	80	No	No	No	No	No	No	ELEVADA	0	0	0	No	No	No	2.2527	0.318674
3313	33	No	Yes	Food and beverages	Medium	2	2	6	16	16	8	34	Female	Married	1	High-school	Machine operator	blue collar	954	1	No		1880	75.1	1.7	25.9862	Overweight	80.8	No	No	120	70	No	No	No	No	No	No	NORMAL	0	0	0	Yes	Yes	No	1.24605	0.425342
3314	33	No	Yes	Food and beverages	Medium	2	2	6	105	9.54546	4.77273	38	Male	Divorced	2	Middle school	Production worker	blue collar	1431	1.5	No		4560	82.7	1.77	26.3973	Overweight	92.9	Yes	Yes	110	70	No	No	No	No	No	No	NORMAL	0	0	0	No	No	No	2.4021	0.34452
3315	33	No	Yes	Food and beverages	Medium	2	2	6	105	9.54546	4.77273	35	Male	Married	4	High-school	Manufacturing technician	white collar	954	1	Yes		3780	60.8	1.67	21.8007	Normal weight	70.5	No	No	110	70	No	No	No	No	No	No	NORMAL	0	0	0	No	No	No	1.50639	0.204522
3316	33	No	Yes	Food and beverages	Medium	2	2	6	105	9.54546	4.77273	25	Male	Single	0	Middle school	Manufacturing technician	white collar	954	1	No		5116	46.7	1.63	17.6852	Underweight	68	No	No	100	60	No	No	No	No	No	No	NORMAL	0	0	0	No	No	No	0.368334	0.014401
3317	33	No	Yes	Food and beverages	Medium	2	2	6	105	9.54546	4.77273	28	Male	Married	0	High-school	Manufacturing technician	white collar	1400	1.46751	No		136	59	1.64	21.9363	Normal weight	75	No	No	120	80	No	No	No	No	No	No	NORMAL	0	0	0	No	No	No	1.59204	0.279103
3318	33	No	Yes	Food and beverages	Medium	2	2	6	105	9.54546	4.77273	28	Male	Married	1	Middle school	Administrative assistant	white collar	954	1	No		0	60.7	1.68	21.5065	Normal weight	80.5	No	No	100	70	No	No	No	No	No	No	NORMAL	0	0	0	No	No	No	0.473744	0.026097
3319	33	No	Yes	Food and beverages	Medium	2	2	6	105	9.54546	4.77273	21	Male	Single	0	High-school	Manufacturing technician	white collar	954	1	No		231	73.4	1.72	24.8107	Normal weight	81.8	Yes	No	150	80	No	No	No	No	No	No	ELEVADA	0	0	0	No	No	No	0.4617	0.008999
3320	33	No	Yes	Food and beverages	Medium	2	2	6	105	9.54546	4.77273	29	Male	Married	1	High-school	Manufacturing technician	white collar	954	1	No		0	62.8	1.71	21.4767	Normal weight	80.8	No	No	120	70	No	No	No	No	No	No	NORMAL	0	0	0	No	No	No	1.54379	0.218669
3321	33	No	Yes	Food and beverages	Medium	2	2	6	105	9.54546	4.77273	21	Male	Single	0	High-school	Manufacturing technician	white collar	954	1	No		1840	71	1.78	22.4088	Normal weight	84.5	No	No	110	70	No	No	No	No	No	No	NORMAL	0	0	0	No	No	No	0.388865	0.020508
3322	33	No	Yes	Food and beverages	Medium	2	2	6	105	9.54546	4.77273	22	Male	Single	0	Graduate	Production worker	blue collar	954	1	No		1680	91	1.8	28.2431	Overweight	91.5	No	No	130	80	No	No	No	No	No	No	ELEVADA	0	0	0	No	No	No	0.913991	0.113447
3323	33	No	Yes	Food and beverages	Medium	2	2	6	105	9.54546	4.77273	32	Male	Married	1	High-school	Manufacturing technician	white collar	1908	2	No		2720	99.6	1.79	31.0852	Obesity I	105.7	No	No	120	80	No	No	No	No	No	No	NORMAL	0	0	0	Yes	Yes	Yes	2.11412	0.360003
3324	33	No	Yes	Food and beverages	Medium	2	2	6	105	9.54546	4.77273	23	Male	Single	0	Middle school	Manufacturing technician	white collar	954	1	No		2085	83.8	1.77	26.7484	Overweight	89.1	Yes	No	160	100	No	No	No	No	No	No	ELEVADA	0	0	0	No	No	No	1.03778	0.053616
3401	34	No	Yes	Textile	Medium	8	1.2	6	121	6.05	5.04167	50	Female	Married	1	Elementary school	Production worker	blue collar	954	1	No	No	2133	73.5	1.5	32.6667	Obesity I	106.5	Yes	Yes	150	100	No	No	Yes	No	No	No	ELEVADA	0	0	1	Yes	Yes	Yes	11.926	3.10625
3402	34	No	Yes	Textile	Medium	8	1.2	6	121	6.05	5.04167	44	Female	Married	3	Middle school	Production worker	blue collar	954	1	No	No	2274	81.8	1.58	32.7672	Obesity I	95.8	Yes	Yes	140	90	No	No	No	No	Yes	No	ELEVADA	0	0	0	No	No	No	3.87303	0.580825
3403	34	No	Yes	Textile	Medium	8	1.2	6	121	6.05	5.04167	44	Female	Single	2	High-school	Production worker	blue collar	954	1	No	No	2730	79.6	1.63	29.9597	Overweight	105.4	Yes	Yes	110	80	No	No	No	No	No	No	NORMAL	0	0	0	No	No	No	2.37064	0.55792
3404	34	No	Yes	Textile	Medium	8	1.2	6	121	6.05	5.04167	56	Female	Married	2	Middle school	Production worker	blue collar	954	1	No	No	392.2	63.1	1.5	28.0444	Overweight	94.1	Yes	No	140	90	No	No	No	No	No	No	ELEVADA	0	0	0	No	No	No	8.23258	2.90332
3405	34	No	Yes	Textile	Medium	8	1.2	6	121	6.05	5.04167	31	Female	Divorced	1	High-school	Production worker	blue collar	954	1	No	No	3276	76.4	1.57	30.9952	Obesity I	98.7	No	No	100	70	No	No	No	No	No	No	NORMAL	0	0	0	No	No	No	0.597077	0.157894
3406	34	No	Yes	Textile	Medium	8	1.2	6	121	6.05	5.04167	51	Female	Widower	1	High-school	Production worker	blue collar	954	1	No	No	2490	60.1	1.39	31.1061	Obesity I	97.7	No	No	100	70	No	No	No	No	No	No	NORMAL	0	0	0	No	No	No	2.79361	1.02111
3407	34	No	Yes	Textile	Medium	8	1.2	6	121	6.05	5.04167	50	Female	Married	1	Middle school	Production worker	blue collar	954	1	No	Yes	1840	67	1.49	30.1788	Obesity I	96.4	No	No	120	90	No	No	Yes	No	No	No	ELEVADA	0	0	1	Yes	Yes	Yes	7.78955	4.18574
3408	34	No	Yes	Textile	Medium	8	1.2	6	121	6.05	5.04167	42	Female	Married	1	High-school	Production worker	blue collar	954	1	No	No	636	92.4	1.65	33.9394	Obesity I	103.3	Yes	Yes	120	90	No	No	No	No	No	No	ELEVADO	0	0	0	Yes	Yes	Yes	2.66565	0.630271
3409	34	No	Yes	Textile	Medium	8	1.2	6	121	6.05	5.04167	37	Female	Married	3	Middle school	Production worker	blue collar	954	1	No	No	3591	90.3	1.61	34.8366	Obesity I	109	Yes	Yes	120	80	No	No	No	No	No	No	NORMAL	0	0	0	No	No	No	1.7709	0.317603
3410	34	No	Yes	Textile	Medium	8	1.2	6	121	6.05	5.04167	33	Female	Married	2	Elementary school	Production worker	blue collar	954	1	No	No	1960	74.6	1.59	29.5083	Overweight	83.8	No	No	110	70	No	No	No	No	No	No	NORMAL	0	0	0	No	No	No	1.23536	0.418784
3411	34	No	No	Textile	Medium	8	1.2	6	121	6.05	5.04167	29	Female	Married	1	High-school	Production worker	blue collar	954	1	No	No	1440	61.7	1.56	25.3534	Overweight	77.8	No	No	110	70	No	No	No	No	No	No	NORMAL	0	0	0
3412	34	No	Yes	Textile	Medium	8	1.2	6	121	6.05	5.04167	53	Female	Married	4	Elementary school	Production worker	blue collar	954	1	No	No	3375	83.7	1.55	34.8387	Obesity I	113.2	Yes	Yes	140	110	No	No	Yes	Yes	No	No	ELEVADO	0	0	1	Yes	Yes	Yes	13.1745	4.65077
3413	34	No	Yes	Textile	Medium	8	1.2	6	121	6.05	5.04167	67	Female	Single	2	Middle school	Production worker	blue collar	954	1	No	No	2017.5	74.3	1.58	29.7629	Overweight	100.5	Yes	Yes	130	80	No	No	Yes	No	No	No	ELEVADO	0	0	1	Yes	Yes	No	7.65995	8.106
3414	34	No	Yes	Textile	Medium	8	1.2	6	121	6.05	5.04167	44	Female	Married	2	Elementary school	Production worker	blue collar	954	1	No	No	6405	74.9	1.58	30.0032	Obesity I	91	No	No	120	80	Yes	Yes	No	No	No	No	NORMAL	1	1	0	Yes	Yes	Yes	6.75496	2.25092
3415	34	No	No	Textile	Medium	8	1.2	6	121	6.05	5.04167	45	Female	Single	2	High-school	Production worker	blue collar	954	1	No	No	2280	70.8	1.51	31.0513	Obesity I	94.6	Yes	Yes	120	80	No	No	No	No	No	No	NORMAL	0	0	0
3416	34	No	Yes	Textile	Medium	8	1.2	6	121	6.05	5.04167	29	Female	Single	0	Middle school	Manufacturing technician	white collar	1000	1.04822	No	No	4845	78.2	1.52	33.847	Obesity I	100	No	No	120	70	No	No	No	No	No	No	NORMAL	0	0	0	No	No	No	0.744886	0.155844
3417	34	No	Yes	Textile	Medium	8	1.2	6	121	6.05	5.04167	39	Female	Married	0	Middle school	Production worker	blue collar	954	1	No	No	3360	92.2	1.65	33.8659	Obesity I	100	Yes	Yes	120	80	Yes	Yes	Yes	Yes	Yes	Yes	NORMAL	1	1	1	Yes	Yes	Yes	5.27813	1.28117
3418	34	No	No	Textile	Medium	8	1.2	6	121	6.05	5.04167	42	Female	Single	0	High-school	Production worker	blue collar	954	1	No	No	1680	58.6	1.5	26.0444	Overweight	84.2	Yes	Yes	150	110	No	No	No	No	No	No	ELEVADA	0	0	0
3419	34	No	Yes	Textile	Medium	8	1.2	6	121	6.05	5.04167	49	Female	Single	0	High-school	Production worker	blue collar	954	1	No	No	396	48.4	1.54	20.4082	Normal weight	76.7	No	No	120	70	No	No	No	No	No	No	NORMAL	0	0	0	No	No	No	3.03728	0.803317
3420	34	No	Yes	Textile	Medium	8	1.2	6	121	6.05	5.04167	41	Female	Single	1	High-school	Production worker	blue collar	954	1	No	No	3525	77.9	1.61	30.0529	Obesity I	99	Yes	Yes	140	100	No	No	No	No	No	No	ELEVADO	0	0	0	Yes	Yes	Yes	3.77238	0.660725
3421	34	No	Yes	Textile	Medium	8	1.2	6	121	6.05	5.04167	42	Female	Married	3	Middle school	Production worker	blue collar	954	1	No	No	560	87.1	1.58	34.8902	Obesity I	109	Yes	Yes	110	80	No	No	No	No	No	No	NORMAL	0	0	0	Yes	Yes	Yes	2.99144	1.0724
3422	34	No	Yes	Textile	Medium	8	1.2	6	121	6.05	5.04167	43	Female	Married	2	High-school	Manufacturing technician	white collar	4000	4.19287	Yes	No	1455	64	1.53	27.3399	Overweight	87.7	No	No	110	70	No	No	No	No	No	No	NORMAL	0	0	0	No	No	No	2.17004	0.622316
3423	34	No	Yes	Textile	Medium	8	1.2	6	121	6.05	5.04167	26	Female	Married	1	High-school	Machine operator	blue collar	954	1	No	No	1680	67.1	1.65	24.6465	Normal weight	79	No	No	100	60	No	No	No	No	No	No	NORMAL	0	0	0	No	No	No	0.43307	0.323536
3424	34	No	Yes	Textile	Medium	8	1.2	6	121	6.05	5.04167	29	Female	Married	1	High-school	Production worker	blue collar	954	1	No	No	1680	73.1	1.54	30.8231	Obesity I	90.7	No	No	110	70	No	No	No	No	No	No	NORMAL	0	0	0	No	No	No	0.918752	0.492125
3425	34	No	No	Textile	Medium	8	1.2	6	38	45.6	38	32	Male	Married	0	Graduate	Plant manager	white collar	1908	2	Yes	No	591	76.6	1.76	24.7288	Normal weight	84.7	No	No	110	70	No	No	No	No	No	No	NORMAL	0	0	0
3501	35	No	Yes	Textile	Medium	8	1.2	6	119	7.14	5.95	49	Female	Single	5	Middle school	Production worker	blue collar	954	1	No	No	3066	67.7	1.56	27.8189	Overweight	92.8	No	No	150	90	Yes	Yes	No	No	No	No	ELEVADA	1	1	0	Yes	Yes	Yes	15.1649	5.36063
3502	35	No	Yes	Textile	Medium	8	1.2	6	119	7.14	5.95	45	Female	Married	3	High-school	Production worker	blue collar	954	1	No	No	2490	40.8	1.53	17.4292	Underweight	65.5	No	No	110	70	No	No	No	No	No	No	NORMAL	0	0	0	No	No	No	1.73658	0.416968
3503	35	No	Yes	Textile	Medium	8	1.2	6	119	7.14	5.95	57	Female	Divorced	6	Middle school	Production worker	blue collar	954	1	No	No	2640	84.7	1.52	36.6603	Obesity I	106	Yes	Yes	120	90	No	No	Yes	No	No	No	ELEVADA	0	0	1	Yes	Yes	No	8.17835	3.39002
3504	35	No	Yes	Textile	Medium	8	1.2	6	119	7.14	5.95	32	Female	Single	0	High-school	Production worker	blue collar	954	1	No	No	1920	57.2	1.7	19.7924	Normal weight	71.3	No	No	110	70	No	No	No	No	No	No	NORMAL	0	0	0	No	No	No	0.761969	0.157172
3505	35	No	Yes	Textile	Medium	8	1.2	6	119	7.14	5.95	40	Female	Single	2	Elementary school	Production worker	blue collar	954	1	No	No	1715	64.1	1.5	28.4889	Overweight	88	No	No	120	80	No	No	No	No	No	No	NORMAL	0	0	0	Yes	Yes	Yes	3.88388	1.96298
3506	35	No	Yes	Textile	Medium	8	1.2	6	119	7.14	5.95	45	Female	Married	1	High-school	Production worker	blue collar	954	1	No	No	3360	92.2	1.76	29.765	Overweight	100.2	No	No	150	90	No	No	No	No	No	No	ELEVADA	0	0	0	Yes	Yes	Yes	5.38341	1.30487
3507	35	No	Yes	Textile	Medium	8	1.2	6	119	7.14	5.95	41	Female	Married	2	Middle school	Production worker	blue collar	954	1	No	No	3360	82.3	1.68	29.1596	Overweight	100	Yes	Yes	130	90	No	No	No	No	No	No	ELEVADA	0	0	0	Yes	Yes	Yes	3.84112	1.02435
3508	35	No	Yes	Textile	Medium	8	1.2	6	119	7.14	5.95	42	Female	Divorced	2	Elementary school	Production worker	blue collar	954	1	No	No	4695	64.3	1.48	29.3554	Overweight	83.2	No	No	120	80	No	No	No	No	No	No	NORMAL	0	0	0	Yes	Yes	No	3.53263	1.33204
3509	35	No	No	Textile	Medium	8	1.2	6	41	12.3	10.25	40	Male	Married	0	Post graduate	Plant manager	white collar	9540	10	Yes	No	1750	69.6	1.74	22.9885	Normal weight	84.7	No	No	110	60	No	No	No	No	No	No	NORMAL	0	0	0
3510	35	No	Yes	Textile	Medium	8	1.2	6	41	12.3	10.25	35	Male	Single	0	High-school	Plant manager	white collar	2500	2.62	No	No	4095	165.5	1.89	46.3313	Obesity III	103	Yes	Yes	120	80	No	No	No	No	No	No	NORMAL	0	0	0	Yes	Yes	Yes	3.51186	0.574986
3511	35	No	No	Textile	Medium	8	1.2	6	119	7.14	5.95	42	Female	Married	1	High-school	Production worker	white collar	1500	1.57	No	No	2970	52.3	1.55	21.769	Normal weight	75	No	No	100	70	No	No	No	No	No	No	NORMAL	0	0	0
3512	35	No	Yes	Textile	Medium	8	1.2	6	119	7.14	5.95	64	Female	Married	1	High-school	Plant manager	white collar	954	1	Yes	Yes	775	59.7	1.47	27.6274	Overweight	82	Yes	Yes	120	80	No	No	No	No	No	No	NORMAL	0	0	0	Yes	Yes	Yes	20.4982	13.601
3513	35	No	Yes	Textile	Medium	8	1.2	6	119	7.14	5.95	45	Female	Single	0	High-school	Production worker	blue collar	954	1	No	No	791	47.9	1.52	20.7323	Normal weight	67.8	No	No	120	80	No	No	No	No	No	No	NORMAL	0	0	0	No	No	No	3.52981	1.23923
3514	35	No	Yes	Textile	Medium	8	1.2	6	41	12.3	10.25	29	Male	Single	3	Elementary school	Machine operator	blue collar	954	1	No	No	1520	83.6	1.72	28.2585	Overweight	89.3	Yes	No	160	120	No	No	No	No	No	No	ELEVADA	0	0	0	No	No	No	2.36034	0.280496
3515	35	No	Yes	Textile	Medium	8	1.2	6	119	7.14	5.95	40	Female	Married	3	Middle school	Production worker	blue collar	954	1	No	No	2842.5	64.3	1.55	26.7638	Overweight	86.4	No	No	90	60	No	No	No	No	No	No	NORMAL	0	0	0	Yes	Yes	No	1.91839	1.7013
3516	35	No	Yes	Textile	Medium	8	1.2	6	41	12.3	10.25	23	Male	Single	0	High-school	Production worker	blue collar	954	1	No	No	2505	125.1	1.74	41.3199	Obesity III	126.8	No	No	130	90	No	No	No	No	No	No	ELEVADA	0	0	0	Yes	Yes	Yes	1.1832	0.160315
3517	35	No	Yes	Textile	Medium	8	1.2	6	119	7.14	5.95	45	Female	Married	2	Middle school	Production worker	blue collar	1300	1.36	No	No	4070	63.7	1.6	24.8828	Normal weight	88.2	No	No	120	80	No	No	No	No	No	No	NORMAL	0	0	0	No	No	No	3.31658	0.859851
3518	35	No	Yes	Textile	Medium	8	1.2	6	119	7.14	5.95	37	Female	Married	2	High-school	Production worker	blue collar	954	1	No	No	4440	73.4	1.56	30.1611	Obesity I	90.3	No	No	100	70	No	No	No	No	No	No	NORMAL	0	0	0	No	No	No	1.75362	1.11217
3519	35	No	Yes	Textile	Medium	8	1.2	6	119	7.14	5.95	48	Female	Widower	2	Elementary school	Production worker	blue collar	954	1	No	No	3375	68.9	1.55	28.6785	Overweight	97.8	No	No	130	90	No	No	No	No	No	No	ELEVADA	0	0	0	Yes	Yes	Yes	6.02985	1.87117
3520	35	No	Yes	Textile	Medium	8	1.2	6	119	7.14	5.95	49	Female	Married	2	High-school	Production worker	blue collar	954	1	Yes	No	6495	92.1	1.61	35.531	Obesity I	108.8	Yes	Yes	130	90	No	No	Yes	No	No	No	ELEVADA	0	0	1	No	No	No	3.87462	0.820422
3521	35	No	Yes	Textile	Medium	8	1.2	6	119	7.14	5.95	50	Female	Married	2	High-school	Production worker	blue collar	954	1	No	No	1983	69.1	1.51	30.3057	Obesity I	93	No	No	150	90	No	No	No	No	No	No	ELEVADA	0	0	0	No	No	No	6.50244	1.6106
3522	35	No	Yes	Textile	Medium	8	1.2	6	119	7.14	5.95	33	Female	Single	0	Middle school	Production worker	blue collar	954	1	No	No	1920	96	1.69	33.6123	Obesity I	107.5	No	No	130	100	No	No	No	No	No	No	ELEVADA	0	0	0	Yes	Yes	Yes	1.81733	0.645734
3523	35	No	Yes	Textile	Medium	8	1.2	6	119	7.14	5.95	43	Female	Single	2	Middle school	Production worker	blue collar	954	1	No	No	480	128.7	1.61	49.6509	Obesity III	133.7	Yes	Yes	150	110	No	No	No	No	No	No	ELEVADA	0	0	0	Yes	Yes	Yes	7.42342	1.84036
3524	35	No	Yes	Textile	Medium	8	1.2	6	119	7.14	5.95	39	Female	Married	2	Graduate	Machine operator	blue collar	954	1	No	No	0	56.9	1.47	26.3316	Overweight	95.5	No	No	130	90	No	No	No	No	No	No	ELEVADA	0	0	0	Yes	Yes	Yes	2.46242	0.595481
3601	36	No	Yes	Food and beverages	Small	1	3	12	22	7.33333	2.44444	26	Female	Single	1	High-school	Production worker	blue collar	937	1	No		594	54.3	1.6	21.2109	Normal weight	74	No	No	130	90	No	No	No	No	No	No	ELEVADA	0	0	0	No	No	No	0.914673	0.389599
3602	36	No	Yes	Food and beverages	Small	1	3	12	22	6.6	2.2	65	Male	Widower	3	High-school	Machine operator	blue collar	937	1	No	No	198	60.4	1.6	23.5938	Normal weight	80.8	No	No	120	70	Yes	Yes	No	No	No	No	NORMAL	1	1	0	No	No	No	20.2227	0.010919
3603	36	No	No	Food and beverages	Small	1	3	12	22	6.6	2.2	40	Male	Married	1	Middle school	Production worker	blue collar	1000	1.06724	No	No	1240	82	1.63	30.863	Obesity I	99.9	No	No			No	No	No	No	No	No		0	0	0
3604	36	No	No	Food and beverages	Small	1	3	12	22	7.33333	2.44444	35	Female	Married	1	High-school	Production worker	blue collar	937	1	No	No	3450	69.9	1.55	29.0947	Overweight	91.7	No	No			No	No	No	No	No	No		0	0	0
3605	36	No	Yes	Food and beverages	Small	1	3	12	22	6.6	2.2	61	Male	Single	0	Elementary school	Machine operator	white collar	937	1	No	No	360	80.3	1.77	25.6312	Overweight	90.8	No	No	120	70	No	No	No	No	No	No	NORMAL	0	0	0	No	No	No	18.8324	11.3175
3606	36	No	Yes	Food and beverages	Small	1	3	12	22	6.6	2.2	63	Male	Married	2	Illiterate	Production worker	white collar	937	1	No	No	1440	58.9	1.65	21.6345	Normal weight	81.8	No	No	180	100	No	No	No	No	No	No	ELEVADA	0	0	0	No	No	No	22.0024	15.8693
3607	36	No	No	Food and beverages	Small	1	3	12	22	7.33333	2.44444	31	Female	Single	0	High-school	Administrative assistant	white collar	1908	2.03629	No	No	960	62.5	1.66	22.6811	Normal weight	77.9	No	No			No	No	No	No	No	No		0	0	0
3608	36	No	No	Food and beverages	Small	1	3	12	22	7.33333	2.44444	29	Female	Married	1	Graduate	Plant manager	white collar	2862	3.05443	Yes	No	2382	66.6	1.61	25.6935	Overweight	80.6	No	No			No	No	No	No	No	No		0	0	0
3609	36	No	No	Food and beverages	Small	1	3	12	22	7.33333	2.44444	41	Female	Single	4	Elementary school	Production worker	blue collar	937	1	No	No	1664	104.6	1.55	43.538	Obesity III	106	No	No			No	No	No	No	No	No		0	0	0
3610	36	No	Yes	Food and beverages	Small	1	3	12	22	7.33333	2.44444	39	Female	Single	0	High-school	Production worker	blue collar	937	1	No	No	777	63.5	1.68	22.5522	Normal weight	80.1	No	No	120	90	No	No	No	No	No	No	ELEVADA	0	0	0	Yes	Yes	No	1.36148	0.160228
3611	36	No	No	Food and beverages	Small	1	3	12	22	6.6	2.2	44	Male	Married	0	Elementary school	Production worker	blue collar	937	1	No	No	2880	57.2	1.61	22.067	Normal weight	76.5	No	No			No	No	No	No	No	No		0	0	0
3612	36	No	Yes	Food and beverages	Small	1	3	12	22	6.6	2.2	58	Male	Married	2	High-school	Production worker	blue collar	937	1	No	No	2880	73.3	1.54	30.9074	Obesity I	103.3	No	No	140	90	No	No	Yes	No	No	No	ELEVADA	0	0	1	Yes	Yes	Yes	21.2293	11.7282
3613	36	No	No	Food and beverages	Small	1	3	12	22	6.6	2.2	37	Male	Married	2	Elementary school	Production worker	blue collar	937	1	No	No	2160	92.7	1.71	31.7021	Obesity I	102.3	No	No			No	No	No	No	No	No		0	0	0
3614	36	No	No	Food and beverages	Small	1	3	12	22	7.33333	2.44444	36	Female	Single	0	High-school	Production worker	blue collar	937	1	No	No	2628	89.8	1.59	35.5207	Obesity I	105.4	No	No			No	No	No	No	No	No		0	0	0
3615	36	No	Yes	Food and beverages	Small	1	3	12	22	6.6	2.2	55	Male	Married	4	Elementary school	Machine operator	blue collar	937	1	No	No	1580	64.5	1.61	24.8833	Normal weight	82.2	No	No	120	80	No	No	No	No	No	No	NORMAL	0	0	0	No	No	No	8.36156	4.36011
3616	36	No	Yes	Food and beverages	Small	1	3	12	22	7.33333	2.44444	45	Female	Married	1	Middle school	Production worker	blue collar	937	1	No	No	1737	52	1.57	21.0962	Normal weight	74.3	No	No	110	80	No	No	No	No	No	No	NORMAL	0	0	0	No	No	No	2.5337	0.763312
3617	36	No	No	Food and beverages	Small	1	3	12	22	6.6	2.2	30	Male	Single	2	Elementary school	Production worker	blue collar	937	1	No	No	1680	80.3	1.66	29.1407	Overweight	94	No	No			No	No	No	No	No	No		0	0	0
3618	36	No	Yes	Food and beverages	Small	1	3	12	22	6.6	2.2	48	Male	Married	2	Middle school	Production worker	blue collar	1874	2	No	No	0	60.8	1.61	23.4559	Normal weight	73.2	No	No	110	70	No	No	No	No	No	No	NORMAL	0	0	0	No	No	No	4.62911	1.7742
3619	36	No	No	Food and beverages	Small	1	3	12	22	7.33333	2.44444	36	Female	Married	1	Graduate	Administrative assistant	white collar	1405	1.49947	No	No	7050	65.4	1.61	25.2305	Overweight	88	No	No			No	No	No	No	No	No		0	0	0
3701	37	Yes	Yes	Food and beverages	Small	10	1.33333	4	35	1.79487	1.34615	25	Male	Married	1	Graduate	Manufacturing technician	white collar	1500	1.60085	No	No	0	71.5	1.71	24.452	Normal weight	89	No	No	120	60	No	No	No	No	No	No	NORMAL	0	0	0	No	No	No	0.571482	0.030486
3702	37	Yes	Yes	Food and beverages	Small	10	1.33333	4	35	1.79487	1.34615	51	Male	Married	2	Elementary school	Machine operator	blue collar	1300	1.38741	No	No	240	74.6	1.7	25.8131	Overweight	93.3	No	No	130	90	No	No	No	No	No	No	ELEVADA	0	0	0	No	No	No	8.42367	3.7302
3703	37	Yes	Yes	Food and beverages	Small	10	1.33333	4	35	1.79487	1.34615	29	Male	Single	0	High-school	Machine operator	blue collar	1146	1.22305	No	No	1050	70.5	1.76	22.7596	Normal weight	81.3	No	No	140	90	No	No	No	No	No	No	ELEVADA	0	0	0	No	No	No	1.20873	0.084741
3704	37	Yes	Yes	Food and beverages	Small	10	1.33333	4	5	3.33333	2.5	23	Female	Single	0	High-school	Machine operator	blue collar	937	1	No	No	0	64.7	1.64	24.0556	Normal weight	78.6	No	No	100	60	No	No	No	No	No	No	NORMAL	0	0	0	No	No	No	0.210226	0.042957
3705	37	Yes	Yes	Food and beverages	Small	10	1.33333	4	35	1.79487	1.34615	39	Male	Married	2	Middle school	Production worker	blue collar	937	1	No	No	740	87.4	1.71	29.8895	Overweight	99.6	Yes	Yes	130	70	No	No	No	No	No	No	ELEVADA	0	0	0	No	No	No	5.51909	1.18874
3706	37	Yes	Yes	Food and beverages	Small	10	1.33333	4	35	1.79487	1.34615	19	Male	Single	0	High-school	Manufacturing technician	white collar	937	1	No	No	0	62.5	1.75	20.4082	Normal weight	70.6	No	No	100	70	No	No	No	No	No	No	NORMAL	0	0	0	No	No	No	0.17641	0.003075
3707	37	Yes	Yes	Food and beverages	Small	10	1.33333	4	35	1.79487	1.34615	54	Male	Widower	3	Middle school	Machine operator	blue collar	937	1	No	No	1956	68.1	1.62	25.9488	Overweight	87.3	No	No	150	90	No	No	No	No	No	No	ELEVADA	0	0	0	Yes	No	No	12.9532	6.34886
3708	37	Yes	Yes	Food and beverages	Small	10	1.33333	4	5	3.33333	2.5	32	Female	Single	0	Graduate	Manufacturing technician	white collar	1908	2.03629	Yes	No	487.5	54.1	1.62	20.7421	Normal weight	75.4	No	No	100	70	No	No	No	No	No	No	NORMAL	0	0	0	No	No	No	0.790195	0.190263
3709	37	Yes	Yes	Food and beverages	Small	10	1.33333	4	35	1.79487	1.34615	47	Male	Married	3	Middle school	Manufacturing technician	white collar	1700	1.8143	Yes	No	0	68.1	1.56	27.9832	Overweight	94.5	No	No	140	70	No	No	No	No	No	No	ELEVADA	0	0	0	Yes	Yes	Yes	7.55839	2.65715
3710	37	Yes	Yes	Food and beverages	Small	10	1.33333	4	35	1.79487	1.34615	28	Male	Single	0	High-school	Production worker	blue collar	937	1	No	No	2490	72.2	1.7	24.9827	Normal weight	78	No	No	110	60	No	No	No	No	No	No	NORMAL	0	0	0	No	No	No	0.851251	0.069352
3711	37	Yes	Yes	Food and beverages	Small	10	1.33333	4	35	1.79487	1.34615	41	Male	Married	2	High-school	Production worker	blue collar	937	1	No	No	3000	87.5	1.76	28.2477	Overweight	92.1	No	No	120	80	No	No	No	No	No	No	NORMAL	0	0	0	No	No	No	2.58573	0.582651
3712	37	Yes	Yes	Food and beverages	Small	10	1.33333	4	35	1.79487	1.34615	23	Male	Single	0	High-school	Manufacturing technician	white collar	1700	1.8143	Yes	No	480	69.3	1.74	22.8894	Normal weight	79.8	No	No	110	60	No	No	No	No	No	No	NORMAL	0	0	0	No	No	No	0.328173	0.0095
3713	37	Yes	Yes	Food and beverages	Small	10	1.33333	4	35	1.79487	1.34615	24	Male	Married	0	High-school	Production worker	blue collar	937	1	No	No	240	49	1.65	17.9982	Underweight	66	No	No	120	70	No	No	No	No	No	No	NORMAL	0	0	0	No	No	No	0.454368	0.018887
3714	37	Yes	Yes	Food and beverages	Small	10	1.33333	4	35	1.79487	1.34615	33	Male	Single	0	Graduate	Plant manager	white collar	4770	5.09071	Yes	Yes	39.6	97	1.82	29.4455	Overweight	105.4	Yes	No	120	80	No	No	No	No	No	No	NORMAL	0	0	0	No	No	No	3.42799	99.9081
3715	37	Yes	Yes	Food and beverages	Small	10	1.33333	4	35	1.79487	1.34615	27	Male	Single	0	Graduate	Plant manager	white collar	3816	4.07257	Yes	No	1197	72.5	1.62	27.6254	Overweight	92.8	No	No	110	90	No	No	No	No	No	No	ELEVADA	0	0	0	No	No	No	0.891077	0.103102
3716	37	Yes	Yes	Food and beverages	Small	10	1.33333	4	35	1.79487	1.34615	36	Male	Married	1	Middle school	Machine operator	blue collar	1150	1.22732	No	No	1110	82	1.69	28.7105	Overweight	98.3	No	No	130	70	No	No	No	No	No	No	ELEVADA	0	0	0	Yes	Yes	No	1.58822	0.1847
3717	37	Yes	Yes	Food and beverages	Small	10	1.33333	4	35	1.79487	1.34615	32	Male	Single	0	High-school	Machine operator	blue collar	937	1	No	No	960	86.3	1.89	24.262	Normal weight	88	No	No	130	80	No	No	No	No	No	No	ELEVADA	0	0	0	No	No	No	1.14568	0.086892
3718	37	Yes	Yes	Food and beverages	Small	10	1.33333	4	35	1.79487	1.34615	32	Male	Married	2	High-school	Machine operator	blue collar	937	1	No	No	2760	106.3	1.79	33.1762	Obesity I	103.8	Yes	No	100	70	No	No	No	No	No	No	NORMAL	0	0	0	No	No	No	0.876694	0.084965
3719	37	Yes	Yes	Food and beverages	Small	10	1.33333	4	35	1.79487	1.34615	54	Male	Married	1	Elementary school	Machine operator	blue collar	1386	1.47919	No	No	577.5	72.4	1.69	25.3493	Overweight	97	Yes	Yes	130	70	No	No	No	No	No	No	ELEVADA	0	0	0	Yes	Yes	No	8.72112	3.59033
3720	37	Yes	Yes	Food and beverages	Small	10	1.33333	4	35	1.79487	1.34615	47	Male	Married	2	Illiterate	Machine operator	blue collar	937	1	No	No	165	70.5	1.58	28.4203	Overweight	94.5	No	No	120	90	No	No	No	No	No	No	ELEVADA	0	0	0	No	No	No	4.80969	1.70607
3721	37	Yes	Yes	Food and beverages	Small	10	1.33333	4	35	1.79487	1.34615	44	Male	Single	2	Elementary school	Manufacturing technician	white collar	1070	1.14194	No	Yes	720	61.9	1.59	24.4848	Normal weight	88.1	No	No	120	70	No	No	No	No	No	No	NORMAL	0	0	0	No	No	No	8.64183	100
3722	37	Yes	Yes	Food and beverages	Small	10	1.33333	4	35	1.79487	1.34615	27	Male	Single	0	Middle school	Machine operator	blue collar	937	1	No	No	1059	48.1	1.62	18.328	Underweight	69.4	No	No	100	60	No	No	No	No	No	No	NORMAL	0	0	0	No	No	No	0.386095	0.015991
3723	37	Yes	Yes	Food and beverages	Small	10	1.33333	4	35	1.79487	1.34615	54	Male	Divorced	2	Elementary school	Manufacturing technician	white collar	1520	1.6222	Yes	No	330	78.2	1.65	28.7236	Overweight	99	No	No	120	70	No	No	No	Yes	No	No	NORMAL	0	0	0	Yes	Yes	No	11.9938	6.36189
3724	37	Yes	Yes	Food and beverages	Small	10	1.33333	4	35	1.79487	1.34615	65	Male	Married	0	Elementary school	Machine operator	blue collar	1800	1.92102	No	No	825	86.9	1.69	30.4261	Obesity I	109	Yes	Yes			No	No	No	No	No	No		0	0	0	No	No	No		0.002078
3725	37	Yes	Yes	Food and beverages	Small	10	1.33333	4	35	1.79487	1.34615	41	Male	Married	3	High-school	Machine operator	blue collar	1200	1.28068	No	No	2925	62.4	1.6	24.375	Normal weight	84.5	No	No	120	80	No	No	No	No	No	No	NORMAL	0	0	0	No	No	No	1.68003	0.255554
3726	37	Yes	Yes	Food and beverages	Small	10	1.33333	4	35	1.79487	1.34615	55	Male	Married	1	Elementary school	Machine operator	blue collar	937	1	No	Yes	462	70.5	1.7	24.3945	Normal weight	93.8	No	No			No	No	No	No	No	No		0	0	0	No	No	No		1.87486
3727	37	Yes	No	Food and beverages	Small	10	1.33333	4	35	1.79487	1.34615	47	Male	Married	3	High-school	Machine operator	blue collar	1146	1.22305	No	No	0	59.9	1.65	22.0018	Normal weight	82.8	No	No	110	80	No	No	Yes	No	No	No	NORMAL	0	0	1
3728	37	Yes	No	Food and beverages	Small	10	1.33333	4	35	1.79487	1.34615	48	Male	Married	5	High-school	Manufacturing technician	white collar	937	1	Yes	No	2685.5	81.8	1.75	26.7102	Overweight	93.7	No	No	140	100	No	No	No	No	No	No	ELEVADA	0	0	0
3801	38	Yes	Yes	Textile	Large	18	3	3	313	37.56	12.52	42	Male	Single	2	High-school	Manufacturing technician	white collar	1200	1.28068	Yes	No	24850	67.5	1.66	24.4956	Normal weight	79	No	No	100	60	No	No	No	No	No	No	NORMAL	0	0	0	No	No	No	2.99904	0.843397
3802	38	Yes	No	Textile	Large	18	3	3	267	33.375	11.125	49	Female	Married	2	High-school	Machine operator	blue collar	937	1	No	No	2820	68.6	1.63	25.8196	Overweight	91.2	No	No	100	60	No	No	No	No	No	No	NORMAL	0	0	0
3803	38	Yes	Yes	Textile	Large	18	3	3	313	37.56	12.52	45	Male	Married	2	High-school	Manufacturing technician	white collar	2080	2.21985	Yes	No	231	92.2	1.9	25.5402	Overweight	101.5	No	No	100	70	No	No	No	No	No	No	NORMAL	0	0	0	No	No	No	4.57521	1.62657
3804	38	Yes	No	Textile	Large	18	3	3	313	37.56	12.52	38	Male	Single	4	High-school	Manufacturing technician	white collar	937	1	Yes	No	852	66.7	1.78	21.0516	Normal weight	77.8	No	No	120	80	No	No	No	No	No	No	NORMAL	0	0	0
3805	38	Yes	No	Textile	Large	18	3	3	313	37.56	12.52	52	Male	Married	3	Middle school	Manufacturing technician	white collar	1335.6	1.4254	Yes	No	0	67.3	1.64	25.0223	Overweight	96	No	No	120	80	No	No	No	No	No	No	NORMAL	0	0	0
3806	38	Yes	No	Textile	Large	18	3	3	267	33.375	11.125	38	Female	Divorced	1	High-school	Manufacturing technician	white collar	1028	1.09712	No	No	1062	55	1.53	23.4952	Normal weight	78.6	No	No	100	60	No	No	No	No	No	No	NORMAL	0	0	0
3807	38	Yes	No	Textile	Large	18	3	3	313	37.56	12.52	32	Male	Married	2	High-school	Manufacturing technician	white collar	1431	1.52721	Yes	No	1440	69.7	1.8	21.5123	Normal weight	77.8	No	No	120	80	No	No	No	No	No	No	NORMAL	0	0	0
3808	38	Yes	No	Textile	Large	18	3	3	313	37.56	12.52	57	Male	Married	3	High-school	Manufacturing technician	white collar	1400	1.49413	No	No	0	80.7	1.58	32.3265	Obesity I	101.7	No	No	110	80	No	No	No	No	No	No	NORMAL	0	0	0
3809	38	Yes	No	Textile	Large	18	3	3	313	37.56	12.52	36	Male	Married	3	High-school	Manufacturing technician	white collar	1400	1.49413	Yes	No	1440	89.5	1.75	29.2245	Overweight	104.5	No	No	130	80	No	No	No	No	No	No	ELEVADA	0	0	0
3810	38	Yes	No	Textile	Large	18	3	3	313	37.56	12.52	34	Male	Single	0	High-school	Machine operator	blue collar	937	1	Yes	No	4800	63.1	1.58	25.2764	Overweight	86.3	No	No	120	80	No	No	No	No	No	No	NORMAL	0	0	0
3811	38	Yes	No	Textile	Large	18	3	3	267	33.375	11.125	44	Female	Married	0	High-school	Machine operator	blue collar	937	1	No	No	3360	44	1.52	19.0443	Normal weight	73.4	No	No	100	60	No	No	No	No	No	No	NORMAL	0	0	0
3812	38	Yes	No	Textile	Large	18	3	3	267	33.375	11.125	54	Female	Married	2	High-school	Machine operator	blue collar	937	1	No	No	1400	57.5	1.54	24.2452	Normal weight	85.5	No	No	120	70	No	No	No	No	No	No	NORMAL	0	0	0
3813	38	Yes	Yes	Textile	Large	18	3	3	313	37.56	12.52	56	Male	Married	2	High-school	Administrative assistant	white collar	1154	1.23159	No	No	720	77.2	1.61	29.7828	Overweight	111.6	No	No	110	70	No	No	No	No	No	No	NORMAL	0	0	0	No	No	No	8.06569	4.40119
3814	38	Yes	No	Textile	Large	18	3	3	313	37.56	12.52	43	Male	Married	2	High-school	Machine operator	blue collar	937	1	No	No	720	70.9	1.63	26.6852	Overweight	98.5	No	No	120	80	No	No	No	No	No	No	NORMAL	0	0	0
3815	38	Yes	No	Textile	Large	18	3	3	267	33.375	11.125	40	Female	Married	0	Middle school	Machine operator	blue collar	937	1	No	No	1356	75.2	1.57	30.5083	Obesity I	104.2	Yes	Yes	120	80	No	No	No	No	No	No	NORMAL	0	0	0
3816	38	Yes	No	Textile	Large	18	3	3	313	37.56	12.52	40	Male	Married	0	Elementary school	Machine operator	blue collar	937	1	No	No	337	76.3	1.57	30.9546	Obesity I	99.6	No	No	140	100	No	No	No	No	No	No	ELEVADA	0	0	0
3817	38	Yes	No	Textile	Large	18	3	3	267	33.375	11.125	29	Female	Married	1	High-school	Machine operator	blue collar	937	1	No	No	3360	79.1	1.69	27.6951	Overweight	91	No	No	100	70	No	No	No	No	No	No	NORMAL	0	0	0
3818	38	Yes	No	Textile	Large	18	3	3	267	33.375	11.125	45	Female	Single	0	High-school	Machine operator	blue collar	937	1	No	No	720	71.2	1.57	28.8856	Overweight	89.1	No	No	120	80	No	No	No	No	No	No	NORMAL	0	0	0
3819	38	Yes	No	Textile	Large	18	3	3	267	33.375	11.125	47	Female	Married	3	High-school	Machine operator	blue collar	937	1	No	No	2790	67.1	1.63	25.255	Overweight	84.5	No	No	120	80	No	No	No	No	No	No	NORMAL	0	0	0
3820	38	Yes	No	Textile	Large	18	3	3	267	33.375	11.125	32	Female	Single	2	High-school	Machine operator	blue collar	937	1	No	No	1920	66.1	1.67	23.7011	Normal weight	85	Yes	No	120	90	No	No	No	No	No	No	ELEVADA	0	0	0
3821	38	Yes	Yes	Textile	Large	18	3	3	267	33.375	11.125	45	Female	Married	1	High-school	Production worker	white collar	1240.2	1.32359	No	No	2940	59.9	1.54	25.2572	Overweight	82.8	No	No	110	70	No	No	No	No	No	No	NORMAL	0	0	0	No	No	No	1.80855	0.375623
3822	38	Yes	No	Textile	Large	18	3	3	267	33.375	11.125	41	Female	Married	1	High-school	Machine operator	blue collar	1431	1.52721	No	No	3360	67.5	1.57	27.3845	Overweight	77	No	No	100	60	No	No	No	No	No	No	NORMAL	0	0	0
3823	38	Yes	No	Textile	Large	18	3	3	267	33.375	11.125	22	Female	Married	0	High-school	Machine operator	blue collar	937	1	No	No	5295	68	1.73	22.7204	Normal weight	83.1	No	No	110	80	No	No	No	No	No	No	NORMAL	0	0	0
3824	38	Yes	No	Textile	Large	18	3	3	267	33.375	11.125	49	Female	Widower	2	High-school	Machine operator	blue collar	937	1	No	No	3360	74.2	1.6	28.9844	Overweight	94.8	No	No	120	80	No	No	No	No	No	No	NORMAL	0	0	0
3825	38	Yes	No	Textile	Large	18	3	3	313	37.56	12.52	45	Male	Married	3	Middle school	Machine operator	blue collar	937	1	No	No	1768.5	77.8	1.64	28.9262	Overweight	100.9	Yes	Yes	120	80	No	No	No	No	No	No	NORMAL	0	0	0
3826	38	Yes	Yes	Textile	Large	18	3	3	267	33.375	11.125	44	Female	Married	2	High-school	Machine operator	blue collar	937	1	No	No	2960	58.9	1.62	22.4432	Normal weight	85.3	No	No	90	70	No	No	No	No	No	No	NORMAL	0	0	0	No	No	No	1.44946	0.487614
3827	38	Yes	No	Textile	Large	18	3	3	267	33.375	11.125	38	Female	Single	0	High-school	Machine operator	blue collar	937	1	No	No	1417	77.3	1.63	29.0941	Overweight	101.8	No	No	110	90	No	No	No	No	No	No	ELEVADA	0	0	0
3828	38	Yes	No	Textile	Large	18	3	3	267	33.375	11.125	40	Female	Married	3	Middle school	Administrative assistant	white collar	937	1	No	No	960	71.8	1.62	27.3586	Overweight	89.8	Yes	No	110	80	No	No	No	No	No	No	NORMAL	0	0	0
3829	38	Yes	No	Textile	Large	18	3	3	313	37.56	12.52	29	Male	Married	2	High-school	Machine operator	blue collar	937	1	No	No	4800	52.9	1.62	20.157	Normal weight	75.3	No	No	110	80	No	No	No	No	No	No	NORMAL	0	0	0
3830	38	Yes	No	Textile	Large	18	3	3	267	33.375	11.125	38	Female	Married	2	High-school	Production worker	white collar	937	1	No	No	2760	64.6	1.63	24.3141	Normal weight	85	Yes	Yes	110	70	No	No	No	No	No	No	NORMAL	0	0	0
3831	38	Yes	No	Textile	Large	18	3	3	313	37.56	12.52	35	Male	Single	1	High-school	Machine operator	blue collar	937	1	No	No	840	89.2	1.78	28.153	Overweight	95.1	No	No	120	80	No	No	No	No	No	No	NORMAL	0	0	0
3832	38	Yes	No	Textile	Large	18	3	3	267	33.375	11.125	55	Female	Married	3	Middle school	Machine operator	blue collar	937	1	No	No	6030	63.6	1.53	27.169	Overweight	90.3	Yes	Yes	110	60	No	No	No	No	No	No	NORMAL	0	0	0
3833	38	Yes	No	Textile	Large	18	3	3	313	37.56	12.52	36	Male	Married	1	High-school	Machine operator	blue collar	937	1	No	No	2868	90.5	1.67	32.4501	Obesity I	103.8	No	No	110	80	No	No	No	No	No	No	NORMAL	0	0	0
3834	38	Yes	No	Textile	Large	18	3	3	267	33.375	11.125	39	Female	Married	2	High-school	Machine operator	blue collar	937	1	No	No	1680	59.1	1.57	23.9766	Normal weight	83.8	No	No	110	60	No	No	No	No	No	No	NORMAL	0	0	0
3835	38	Yes	No	Textile	Large	18	3	3	267	33.375	11.125	26	Female	Single	1	High-school	Machine operator	blue collar	937	1	No	No	1200	59.5	1.5	26.4444	Overweight	78.7	No	No	100	70	No	No	No	No	No	No	NORMAL	0	0	0
3836	38	Yes	No	Textile	Large	18	3	3	267	33.375	11.125	58	Female	Single	1	High-school	Machine operator	blue collar	937	1	No	No	900	51.2	1.48	23.3747	Normal weight	72	No	No	110	70	No	No	No	No	No	No	NORMAL	0	0	0
3837	38	Yes	Yes	Textile	Large	18	3	3	313	37.56	12.52	47	Male	Married	2	High-school	Production worker	white collar	1100	1.17396	No	No	4064	73.9	1.65	27.1442	Overweight	86.7	No	No	150	100	No	No	No	No	No	No	ELEVADA	0	0	0	No	No	No	7.47756	2.54581
3838	38	Yes	No	Textile	Large	18	3	3	313	37.56	12.52	40	Male	Married	0	High-school	Machine operator	blue collar	937	1	No	No	471	67.4	1.58	26.9989	Overweight	87.5	No	No	90	60	No	No	No	No	No	No	NORMAL	0	0	0
3839	38	Yes	No	Textile	Large	18	3	3	313	37.56	12.52	26	Male	Married	0	High-school	Manufacturing technician	white collar	1800	1.92102	Yes	No	2000	74.9	1.76	24.18	Normal weight	81.1	No	No	110	70	No	No	No	No	No	No	NORMAL	0	0	0
3840	38	Yes	No	Textile	Large	18	3	3	313	37.56	12.52	51	Male	Married	3	High-school	Machine operator	blue collar	937	1	No	No	132	66.9	1.6	26.1328	Overweight	93.7	Yes	Yes	120	70	No	No	No	Yes	No	No	NORMAL	0	0	0
3841	38	Yes	No	Textile	Large	18	3	3	267	33.375	11.125	49	Female	Single	0	High-school	Machine operator	blue collar	937	1	No	No	4920	62.6	1.62	23.8531	Normal weight	89.5	No	No	140	90	No	No	No	No	No	No	ELEVADA	0	0	0
3842	38	Yes	Yes	Textile	Large	18	3	3	313	37.56	12.52	49	Male	Married	2	High-school	Machine operator	blue collar	937	1	No	No	1600	84.1	1.78	26.5434	Overweight	94.5	Yes	Yes	140	80	No	No	No	No	No	No	ELEVADA	0	0	0	Yes	Yes	No	12.0583	3.98567
3843	38	Yes	No	Textile	Large	18	3	3	313	37.56	12.52	46	Male	Married	2	High-school	Machine operator	blue collar	937	1	No	No	3840	90.4	1.67	32.4142	Obesity I	103.2	No	No	120	80	No	No	No	No	No	No	NORMAL	0	0	0
3844	38	Yes	No	Textile	Large	18	3	3	313	37.56	12.52	50	Male	Married	2	Elementary school	Machine operator	blue collar	937	1	No	No	2316	83.2	1.67	29.8326	Overweight	107.8	No	No	140	90	No	No	No	No	No	No	ELEVADA	0	0	0
3845	38	Yes	No	Textile	Large	18	3	3	313	37.56	12.52	20	Male	Single	0	High-school	Machine operator	blue collar	937	1	No	No	360	63.5	1.85	18.5537	Normal weight	74	No	No	100	60	No	No	No	No	No	No	NORMAL	0	0	0
3846	38	Yes	No	Textile	Large	18	3	3	267	33.375	11.125	36	Female	Married	1	Elementary school	Production worker	blue collar	937	1	No	No	3084	55.6	1.55	23.1426	Normal weight	76.5	No	No	110	70	No	No	No	No	No	No	NORMAL	0	0	0
3847	38	Yes	No	Textile	Large	18	3	3	313	37.56	12.52	20	Male	Single	0	High-school	Machine operator	blue collar	937	1	No	No	1075.5	79	1.81	24.114	Normal weight	100.2	No	No	110	70	No	No	No	No	No	No	NORMAL	0	0	0
3848	38	Yes	No	Textile	Large	18	3	3	267	33.375	11.125	27	Female	Married	0	High-school	Machine operator	blue collar	937	1	No	No	1191	61.8	1.63	23.2602	Normal weight	73.3	No	No	100	70	No	No	No	No	No	No	NORMAL	0	0	0
3849	38	Yes	No	Textile	Large	18	3	3	313	37.56	12.52	30	Male	Married	0	High-school	Machine operator	blue collar	937	1	No	No	1680	67.8	1.72	22.9178	Normal weight	84.4	No	No	100	70	No	No	No	No	No	No	NORMAL	0	0	0
3901	39	Yes	No	Food and beverages	Large	12	3	3	522	65.25	21.75	57	Male	Married	2	Elementary school	Machine operator	blue collar	954	1	No	No	2560	74.4	1.61	28.7026	Overweight	96	No	No	100	70	No	No	Yes	No	No	No	NORMAL	0	0	1
3902	39	Yes	No	Food and beverages	Large	12	3	3	151	20.5909	6.86364	31	Female	Married	1	High-school	Manufacturing technician	white collar	1891	1.98218	No	No	7200	62.2	1.53	26.571	Overweight	84.2	No	No	90	50	No	No	No	No	No	No	NORMAL	0	0	0
3903	39	Yes	No	Food and beverages	Large	12	3	3	151	20.5909	6.86364	52	Female	Single	0	High-school	Machine operator	blue collar	1048	1.09853	No	No	3360	53	1.53	22.6113	Normal weight	77.9	No	No	120	80	No	No	No	No	No	No	NORMAL	0	0	0
3904	39	Yes	No	Food and beverages	Large	12	3	3	151	20.5909	6.86364	52	Female	Married	3	High-school	Administrative assistant	white collar	2862	3	No	No	1533	64	1.55	26.6389	Overweight	84.3	Yes	Yes	100	60	No	No	No	No	No	No	NORMAL	0	0	0
3905	39	Yes	No	Food and beverages	Large	12	3	3	522	65.25	21.75	25	Male	Single	0	Graduate	Administrative assistant	white collar	937	0.98218	Yes	No	462	83.7	1.84	24.7224	Normal weight	76.3	No	No	120	80	No	No	No	No	No	No	NORMAL	0	0	0
3906	39	Yes	No	Food and beverages	Large	12	3	3	522	65.25	21.75	36	Male	Married	3	Middle school	Manufacturing technician	white collar	937	0.98218	No	No	2151	70.4	1.69	24.649	Normal weight	81.5	No	No	120	80	No	No	No	No	No	No	NORMAL	0	0	0
3907	39	Yes	No	Food and beverages	Large	12	3	3	151	20.5909	6.86364	41	Female	Married	2	High-school	Machine operator	blue collar	1040	1.09015	No	No	1680	71	1.5	31.5556	Obesity I	89.5	No	No	100	60	No	No	No	No	No	No	NORMAL	0	0	0
3908	39	Yes	No	Food and beverages	Large	12	3	3	522	65.25	21.75	31	Male	Married	3	Graduate	Manufacturing technician	white collar	7632	8	Yes	No	1878	110	1.67	39.4421	Obesity I	121	Yes	No	140	90	No	No	No	No	No	No	ELEVADA	0	0	0
3909	39	Yes	No	Food and beverages	Large	12	3	3	522	65.25	21.75	40	Male	Married	3	Elementary school	Machine operator	blue collar	1048	1.09853	No	No	0	52.4	1.54	22.0948	Normal weight	75.3	No	No	110	70	No	No	No	No	No	No	NORMAL	0	0	0
3910	39	Yes	No	Food and beverages	Large	12	3	3	522	65.25	21.75	42	Male	Single	0	High-school	Machine operator	blue collar	954	1	No	No	1200	52.1	1.64	19.3709	Normal weight	70	No	No	120	80	No	No	No	No	No	No	NORMAL	0	0	0
3911	39	Yes	No	Food and beverages	Large	12	3	3	522	65.25	21.75	29	Male	Married	1	Middle school	Machine operator	blue collar	1100	1.15304	No	No	822	84.8	1.64	31.5289	Obesity I	103.4	No	No	110	80	No	No	No	No	No	No	NORMAL	0	0	0
3912	39	Yes	No	Food and beverages	Large	12	3	3	522	65.25	21.75	37	Male	Married	1	High-school	Manufacturing technician	white collar	1560	1.63522	Yes	No	3480	107	1.75	34.9388	Obesity I	111.4	No	No	120	90	No	No	No	No	No	No	ELEVADA	0	0	0
3913	39	Yes	No	Food and beverages	Large	12	3	3	522	65.25	21.75	44	Male	Single	2	Middle school	Machine operator	blue collar	1200	1.25786	Yes	No	1340	68.8	1.75	22.4653	Normal weight	83.5	No	No	100	60	No	No	No	No	No	No	NORMAL	0	0	0
3914	39	Yes	No	Food and beverages	Large	12	3	3	522	65.25	21.75	36	Male	Single	1	Graduate	Manufacturing technician	white collar	6678	7	Yes	No	0	86.6	1.69	30.3211	Obesity I	97.9	Yes	Yes	120	80	No	No	No	No	Yes	No	NORMAL	0	0	0
3915	39	Yes	No	Food and beverages	Large	12	3	3	151	20.5909	6.86364	49	Female	Married	2	Middle school	Production worker	blue collar	954	1	No	No	3558	63.3	1.51	27.7619	Overweight	92.3	No	No	110	70	No	No	Yes	Yes	Yes	Yes	NORMAL	0	0	1
3916	39	Yes	No	Food and beverages	Large	12	3	3	151	20.5909	6.86364	27	Female	Divorced	0	High-school	Production worker	blue collar	954	1	No	No	1830	87.3	1.56	35.8728	Obesity I	100.5	No	No	100	90	No	No	Yes	No	No	No	ELEVADA	0	0	1
3917	39	Yes	No	Food and beverages	Large	12	3	3	151	20.5909	6.86364	34	Female	Married	2	Middle school	Production worker	blue collar	954	1	No	No	240	55.9	1.58	22.3922	Normal weight	73	No	No	90	60	No	No	No	No	No	No	NORMAL	0	0	0
3918	39	Yes	No	Food and beverages	Large	12	3	3	522	65.25	21.75	48	Male	Married	1	Middle school	Manufacturing technician	white collar	937	0.98218	No	No	1551	62	1.69	21.7079	Normal weight	77.5	No	No	110	80	No	No	No	No	No	No	NORMAL	0	0	0
3919	39	Yes	No	Food and beverages	Large	12	3	3	522	65.25	21.75	40	Male	Married	2	High-school	Manufacturing technician	white collar	1583	1.65933	No	No	2160	94.2	1.75	30.7592	Obesity I	98.6	No	No	130	90	No	No	No	No	No	No	ELEVADA	0	0	0
3920	39	Yes	No	Food and beverages	Large	12	3	3	522	65.25	21.75	24	Male	Married	0	High-school	Machine operator	blue collar	1240.2	1.3	No	No	0	85.8	1.83	25.6204	Overweight	87.5	No	No	110	70	No	No	No	No	No	No	NORMAL	0	0	0
3921	39	Yes	No	Food and beverages	Large	12	3	3	522	65.25	21.75	47	Male	Single	1	High-school	Manufacturing technician	white collar	937	0.98218	Yes	No	1638	67	1.6	26.1719	Overweight	84.5	No	No	160	80	No	No	No	No	No	No	ELEVADA	0	0	0
3922	39	Yes	No	Food and beverages	Large	12	3	3	522	65.25	21.75	26	Male	Married	2	Middle school	Machine operator	white collar	937	0.98218	No	No	640	57	1.69	20.0759	Normal weight	75.5	No	No	120	80	No	No	No	No	No	No	NORMAL	0	0	0
3923	39	Yes	No	Food and beverages	Large	12	3	3	151	20.5909	6.86364	32	Female	Married	2	High-school	Manufacturing technician	white collar	1000	1.04822	No	No	5040	79	1.66	28.6689	Overweight	94.8	No	No	90	60	No	No	No	No	No	No	NORMAL	0	0	0
3924	39	Yes	No	Food and beverages	Large	12	3	3	151	20.5909	6.86364	42	Female	Single	0	High-school	Machine operator	blue collar	954	1	No	No	2640	58	1.55	24.1415	Normal weight	76.7	No	No	120	80	No	No	No	No	No	No	NORMAL	0	0	0
3925	39	Yes	No	Food and beverages	Large	12	3	3	522	65.25	21.75	30	Male	Single	1	High-school	Machine operator	blue collar	1200	1.25786	No	No	1013	78.9	1.67	28.2907	Overweight	90.5	No	No	110	70	No	No	No	No	No	No	NORMAL	0	0	0
3926	39	Yes	No	Food and beverages	Large	12	3	3	522	65.25	21.75	28	Male	Single	2	Middle school	Machine operator	blue collar	954	1	No	No	960	76.7	1.64	28.4132	Overweight	93.2	No	No	100	60	No	No	No	No	No	No	NORMAL	0	0	0
3927	39	Yes	No	Food and beverages	Large	12	3	3	522	65.25	21.75	44	Male	Married	0	High-school	Food processing worker	blue collar	937	0.98218	No	No	706.5	74.8	1.57	30.3461	Obesity I	96.1	Yes	Yes	140	70	Yes	Yes	No	No	Yes	No	ELEVADA	1	1	0
3928	39	Yes	No	Food and beverages	Large	12	3	3	522	65.25	21.75	23	Male	Single	0	Graduate	Plant manager	white collar	2862	3	Yes	No	1431	86.3	1.87	24.8115	Normal weight	87.5	No	No	110	70	No	No	No	No	No	No	NORMAL	0	0	0
3929	39	Yes	Yes	Food and beverages	Large	12	3	3	522	65.25	21.75	30	Male	Married	1	Graduate	Administrative assistant	white collar	3816	4	Yes	No	480	86.4	1.68	30.6122	Obesity I	88.1	No	No	120	80	No	No	No	No	No	No	NORMAL	0	0	0	No	No	No	1.75261	0.241784
3930	39	Yes	No	Food and beverages	Large	12	3	3	522	65.25	21.75	23	Male	Single	0	High-school	Machine operator	blue collar	954	1	No	No	960	65.2	1.67	23.3784	Normal weight	78.8	No	No	130	70	No	No	No	No	No	No	ELEVADA	0	0	0
3931	39	Yes	Yes	Food and beverages	Large	12	3	3	151	20.5909	6.86364	41	Female	Married	0	High-school	Manufacturing technician	white collar	1908	2	Yes	No	5287.5	98.9	1.61	38.1544	Obesity I	112.2	Yes	Yes	120	80	Yes	No	No	No	No	No	NORMAL	1	0	0	Yes	Yes	Yes	5.14786	0.986757
3932	39	Yes	Yes	Food and beverages	Large	12	3	3	151	20.5909	6.86364	40	Female	Single	1	High-school	Production worker	blue collar	954	1	No	No	1680	48.6	1.43	23.9335	Normal weight	77.3	No	No	100	60	No	No	Yes	No	No	No	NORMAL	0	0	1	No	No	No	1.82388	0.612341
3933	39	Yes	Yes	Food and beverages	Large	12	3	3	151	20.5909	6.86364	43	Female	Married	2	Elementary school	Machine operator	blue collar	954	1	No	No	3360	72	1.53	30.7574	Obesity I	96.5	No	No	100	60	No	No	No	No	No	No	NORMAL	0	0	0	No	No	No	1.65353	0.468424
3934	39	Yes	Yes	Food and beverages	Large	12	3	3	151	20.5909	6.86364	42	Female	Married	0	Middle school	Machine operator	blue collar	964	1.01048	No	No	480	51.3	1.52	22.3507	Normal weight	74.3	No	No			No	No	No	No	No	No		0	0	0	No	No	No		3.7e-05
3935	39	Yes	Yes	Food and beverages	Large	12	3	3	522	65.25	21.75	41	Male	Married	0	Post graduate	Administrative assistant	white collar	2385	2.5	Yes	No	1940	92	1.71	31.4627	Obesity I	106.8	No	No	110	80	No	No	No	No	No	No	NORMAL	0	0	0	No	No	No	2.58208	0.594921
3936	39	Yes	Yes	Food and beverages	Large	12	3	3	522	65.25	21.75	51	Male	Divorced	2	High-school	Machine operator	blue collar	954	1	No	No	2800	93	1.62	35.6564	Obesity I	118.3	Yes	Yes	160	110	No	No	Yes	Yes	No	No	ELEVADA	0	0	1	Yes	Yes	Yes	14.3538	5.21759
3937	39	Yes	Yes	Food and beverages	Large	12	3	3	151	20.5909	6.86364	32	Female	Divorced	1	Middle school	Manufacturing technician	white collar	937	0.98218	No	No	1440	67.5	1.51	29.604	Overweight	80	No	No	100	60	No	No	No	No	No	No	NORMAL	0	0	0	No	No	No	0.539776	0.096751
3938	39	Yes	Yes	Food and beverages	Large	12	3	3	151	20.5909	6.86364	40	Female	Married	2	High-school	Production worker	blue collar	954	1	No	No	198	75.5	1.52	32.5497	Obesity I	92.3	No	No	120	80	No	No	Yes	Yes	No	No	NORMAL	0	0	1	Yes	Yes	Yes	3.3537	1.20053
3939	39	Yes	Yes	Food and beverages	Large	12	3	3	151	20.5909	6.86364	47	Female	Married	3	Post graduate	Administrative assistant	white collar	2385	2.5	Yes	No	840	53.4	1.48	24.3791	Normal weight	78.2	Yes	Yes			No	No	Yes	Yes	Yes	Yes		0	0	1	Yes	No	No		8e-05
3940	39	Yes	Yes	Food and beverages	Large	12	3	3	151	20.5909	6.86364	44	Female	Married	2	High-school	Food processing worker	blue collar	954	1	Yes	No	2280	68.7	1.54	29.0432	Overweight	85.3	No	No	130	80	Yes	Yes	No	No	No	No	ELEVADA	1	1	0	Yes	Yes	Yes	8.19695	2.91379
3941	39	Yes	Yes	Food and beverages	Large	12	3	3	151	20.5909	6.86364	42	Female	Married	2	High-school	Production worker	blue collar	1700	1.78197	Yes	No	1440	107.7	1.55	44.8283	Obesity III	114.9	Yes	Yes	130	80	No	No	No	No	No	No	ELEVADA	0	0	0	Yes	Yes	No	2.84618	0.42656
3942	39	Yes	Yes	Food and beverages	Large	12	3	3	151	20.5909	6.86364	45	Female	Single	3	Middle school	Production worker	blue collar	954	1	No	No	1120	94.4	1.47	43.6855	Obesity III	114.8	Yes	Yes	130	80	Yes	Yes	Yes	Yes	Yes	Yes	ELEVADA	1	1	1	Yes	Yes	Yes	7.20576	1.56823
3943	39	Yes	Yes	Food and beverages	Large	12	3	3	151	20.5909	6.86364	36	Female	Married	2	High-school	Administrative assistant	white collar	1657	1.7369	No	No	5040	84.5	1.66	30.6648	Obesity I	97.6	Yes	Yes	130	80	No	No	No	No	No	No	ELEVADA	0	0	0	Yes	Yes	Yes	2.31819	0.505506
3944	39	Yes	Yes	Food and beverages	Large	12	3	3	151	20.5909	6.86364	22	Female	Single	0	High-school	Administrative assistant	white collar	954	1	No	No	5415	51.5	1.5	22.8889	Normal weight	65.4	No	No	110	60	No	No	No	No	No	No	NORMAL	0	0	0	No	No	No	0.303557	0.172943
3945	39	Yes	Yes	Food and beverages	Large	12	3	3	522	65.25	21.75	50	Male	Married	1	High-school	Administrative assistant	white collar	937	0.98218	No	No	586.5	76.2	1.58	30.524	Obesity I	102.4	Yes	Yes	120	90	No	No	No	No	No	No	ELEVADA	0	0	0	Yes	Yes	Yes	5.77574	1.94557
3946	39	Yes	Yes	Food and beverages	Large	12	3	3	151	20.5909	6.86364	55	Female	Single	1	High-school	Administrative assistant	white collar	1908	2	Yes	No	8400	71.5	1.61	27.7559	Overweight	94.8	Yes	Yes	140	80	No	No	Yes	Yes	Yes	Yes	ELEVADA	0	0	1	Yes	Yes	Yes	10.1689	3.82433
4001	40	No	No	Food and beverages	Large	3	3	3	718	42.2353	14.0784	56	Female	Married	1	Middle school	Production worker	blue collar	937	1	No	No	2660	57.9	1.51	25.3936	Overweight	87.4	No	No	120	90	No	No	No	No	No	No	ELEVADA	0	0	0
4002	40	No	No	Food and beverages	Large	3	3	3	718	42.2353	14.0784	46	Female	Single	0	High-school	Production worker	blue collar	937	1	No	No	4948.5	67.9	1.52	29.3889	Overweight	91	No	No	120	70	No	No	No	No	No	No	NORMAL	0	0	0
4003	40	No	No	Food and beverages	Large	3	3	3	718	42.2353	14.0784	47	Female	Married	3	High-school	Production worker	white collar	937	1	No	No	10773	99.4	1.64	36.9572	Obesity I	117	No	No	140	90	No	No	No	No	No	No	ELEVADA	0	0	0
4004	40	No	No	Food and beverages	Large	3	3	3	718	42.2353	14.0784	49	Female	Divorced	2	Middle school	Production worker	blue collar	937	1	No	No	2320	65.2	1.61	25.1534	Overweight	85	Yes	Yes	140	100	No	No	No	No	No	No	ELEVADA	0	0	0
4005	40	No	No	Food and beverages	Large	3	3	3	718	42.2353	14.0784	55	Female	Married	4	High-school	Manufacturing technician	white collar	1346	1.4365	No	No	5287.5	74.7	1.48	34.1034	Obesity I	107.8	Yes	Yes	120	80	No	No	No	No	No	No	ELEVADA	0	0	0
4006	40	No	Yes	Food and beverages	Large	3	3	3	718	42.2353	14.0784	50	Female	Widower	4	Middle school	Production worker	blue collar	937	1	Yes	No	7119	47.6	1.56	19.5595	Normal weight	68.3	No	No	90	70	No	No	No	No	No	No	NORMAL	0	0	0	No	No	No	1.80964	0.867995
4007	40	No	Yes	Food and beverages	Large	3	3	3	718	42.2353	14.0784	46	Female	Single	1	High-school	Machine operator	blue collar	937	1	No	No	3360	70.4	1.46	33.4839	Obesity I	100.9	No	No	90	60	No	No	No	No	No	No	NORMAL	0	0	0	No	No	No	1.64997	0.69794
4008	40	No	Yes	Food and beverages	Large	3	3	3	718	42.2353	14.0784	49	Female	Single	2	Elementary school	Production worker	blue collar	937	1	No	No	720	55.2	1.57	22.3944	Normal weight	72	No	No	100	70	No	No	No	No	No	No	NORMAL	0	0	0	No	No	No	2.61719	0.942539
4009	40	No	No	Food and beverages	Large	3	3	3	718	42.2353	14.0784	50	Female	Divorced	2	High-school	Production worker	blue collar	937	1	No	No	960	59.7	1.6	23.4374	Normal weight	83.3	No	No	110	80	No	No	No	No	No	No	NORMAL	0	0	0
4010	40	No	No	Food and beverages	Large	3	3	3	718	42.2353	14.0784	52	Female	Married	3	Elementary school	Production worker	blue collar	937	1	No	No	2400	57.1	1.54	24.2337	Normal weight	85.5	No	No	110	80	No	No	No	No	No	No	NORMAL	0	0	0
4011	40	No	No	Food and beverages	Large	3	3	3	718	42.2353	14.0784	52	Female	Married	2	High-school	Production worker	blue collar	937	1	No	No	2340	102.2	1.46	47.9452	Obesity III	126	Yes	Yes	120	90	No	No	Yes	Yes	No	No	ELEVADA	0	0	1
4012	40	No	No	Food and beverages	Large	3	3	3	718	42.2353	14.0784	52	Female	Widower	1	High-school	Production worker	blue collar	1154	1.23159	Yes	No	2880	63	1.5	28	Overweight	92.9	No	No	120	80	No	No	No	No	No	No	NORMAL	0	0	0
4013	40	No	Yes	Food and beverages	Large	3	3	3	718	42.2353	14.0784	49	Female	Married	2	High-school	Manufacturing technician	white collar	937	1	Yes	No	5287.5	69.2	1.56	28.4352	Overweight	81.6	No	No	120	90	No	No	No	No	No	No	ELEVADA	0	0	0	No	No	No	2.00072	0.502442
4014	40	No	No	Food and beverages	Large	3	3	3	718	42.2353	14.0784	41	Female	Married	2	Elementary school	Production worker	blue collar	937	1	No	Yes	1550	43.9	1.55	18.2726	Underweight	70.5	No	No			No	No	No	No	No	No		0	0	0
4015	40	No	Yes	Food and beverages	Large	3	3	3	718	42.2353	14.0784	48	Female	Married	1	High-school	Production worker	blue collar	937	1	No	No	3360	62.9	1.52	27.2247	Overweight	93.6	Yes	Yes	120	80	No	No	No	No	No	No	NORMAL	0	0	0	Yes	Yes	Yes	6.87838	2.47386
4016	40	No	Yes	Food and beverages	Large	3	3	3	718	42.2353	14.0784	47	Female	Single	3	High-school	Production worker	blue collar	937	1	No	No	480	76.3	1.46	35.7947	Obesity I	105.6	Yes	Yes	150	100	No	No	Yes	No	No	No	ELEVADO	0	0	1	Yes	Yes	Yes
4017	40	No	Yes	Food and beverages	Large	3	3	3	718	42.2353	14.0784	45	Female	Widower	1	Middle school	Plant manager	white collar	1431	1.52721	No	No	1680	75.5	1.57	30.63	Obesity I	101.3	No	No	100	70	Yes	No	Yes	No	No	No	NORMAL	1	0	1	No	No	Yes
4018	40	No	No	Food and beverages	Large	3	3	3	718	42.2353	14.0784	53	Female	Divorced	0	High-school	Production worker	blue collar	937	1	No	No	892.5	66.2	1.5	29.4222	Overweight	95.8	Yes	Yes	130	80	No	No	No	No	No	No	ELEVADA	0	0	0
4019	40	No	No	Food and beverages	Large	3	3	3	718	42.2353	14.0784	48	Female	Divorced	5	Middle school	Machine operator	blue collar	1016	1.08431	No	No	3360	81.6	1.62	31.2856	Obesity I	105.8	Yes	Yes	140	100	No	No	No	No	No	No	ELEVADO	0	0	0
4020	40	No	No	Food and beverages	Large	3	3	3	718	42.2353	14.0784	47	Female	Married	3	Graduate	Administrative assistant	white collar	5600	5.97652	Yes	No	1680	83.1	1.6	32.4609	Obesity I	99	No	No	100	70	No	No	Yes	No	No	No	NORMAL	0	0	1
4021	40	No	No	Food and beverages	Large	3	3	3	718	42.2353	14.0784	55	Female	Divorced	2	Middle school	Machine operator	blue collar	937	1	No	No	9120	75.6	1.58	30.2836	Obesity I	107.6	Yes	Yes	150	90	No	No	Yes	No	Yes	No	ELEVADA	0	0	1
4022	40	No	No	Food and beverages	Large	3	3	3	718	42.2353	14.0784	53	Female	Single	0	High-school	Production worker	blue collar	937	1	No	No	1200	63.2	1.56	25.9698	Overweight	90.3	Yes	Yes	110	80	No	No	No	No	No	No	NORMAL	0	0	0
4023	40	No	No	Food and beverages	Large	3	3	3	718	42.2353	14.0784	58	Female	Married	3	Elementary school	Production worker	blue collar	937	1	No	No	1455	86.2	1.52	37.3096	Obesity I	114.7	Yes	Yes	110	70	No	No	No	No	No	No	NORMAL	0	0	0
4024	40	No	Yes	Food and beverages	Large	3	3	3	718	42.2353	14.0784	50	Female	Single	3	Middle school	Machine operator	blue collar	1240	1.32337	No	No	1680	77.2	1.55	32.1332	Obesity I	93.8	Yes	No	120	100	No	No	No	No	No	No	ELEVADA	0	0	0	No	No	No	3.5841	1.00793
4025	40	No	No	Food and beverages	Large	3	3	3	98	36.75	12.25	58	Male	Married	2	Middle school	Machine operator	blue collar	937	1	No	No	500	70.2	1.85	20.5113	Normal weight	88.3	No	No	140	90	No	No	No	No	No	No	ELEVADA	0	0	0
4026	40	No	No	Food and beverages	Large	3	3	3	718	42.2353	14.0784	43	Female	Married	3	Middle school	Production worker	blue collar	937	1	No	No	1160	87.4	1.6	34.355	Obesity I	109.3	Yes	Yes	150	80	Yes	Yes	No	No	No	No	ELEVADA	1	1	0
4027	40	No	No	Food and beverages	Large	3	3	3	718	42.2353	14.0784	44	Female	Married	0	Middle school	Production worker	blue collar	937	1	No	No	1680	59.9	1.56	24.7723	Normal weight	85.5	No	No	120	70	No	No	No	No	No	No	NORMAL	0	0	0
4028	40	No	No	Food and beverages	Large	3	3	3	718	42.2353	14.0784	38	Female	Married	2	High-school	Manufacturing technician	white collar	1100	1.17396	Yes	No	600	81.8	1.55	34.0479	Obesity I	94.8	Yes	Yes	130	90	No	No	No	No	Yes	No	ELEVADA	0	0	0
4029	40	No	No	Food and beverages	Large	3	3	3	718	42.2353	14.0784	36	Female	Divorced	0	High-school	Production worker	blue collar	937	1	No	No	0	75.2	1.62	28.6542	Overweight	84.8	No	No	110	70	No	No	No	No	No	No	NORMAL	0	0	0
4030	40	No	No	Food and beverages	Large	3	3	3	718	42.2353	14.0784	30	Female	Single	1	Middle school	Production worker	blue collar	937	1	No	No	480	56.3	1.53	24.0506	Normal weight	67.4	Yes	No	140	90	No	No	No	No	No	No	ELEVADA	0	0	0
4031	40	No	No	Food and beverages	Large	3	3	3	718	42.2353	14.0784	32	Female	Married	3	Middle school	Production worker	blue collar	937	1	No	No	120	49	1.45	23.3056	Normal weight	73.5	No	No	100	60	No	No	No	No	No	No	NORMAL	0	0	0
4032	40	No	No	Food and beverages	Large	3	3	3	718	42.2353	14.0784	22	Female	Married	0	Middle school	Production worker	blue collar	937	1	No	No	1920	74.3	1.57	30.1432	Obesity I	96.8	No	No	110	70	No	No	No	No	No	No	NORMAL	0	0	0
4033	40	No	No	Food and beverages	Large	3	3	3	718	42.2353	14.0784	44	Female	Single	0	Middle school	Production worker	blue collar	937	1	No	No	2400	60.5	1.54	25.5102	Overweight	89.9	No	No	130	80	No	No	No	No	No	No	ELEVADA	0	0	0
4034	40	No	No	Food and beverages	Large	3	3	3	718	42.2353	14.0784	42	Female	Married	3	High-school	Machine operator	blue collar	937	1	No	No	2880	68.2	1.6	26.6406	Overweight	89.4	No	No	110	70	No	No	No	No	No	No	NORMAL	0	0	0
4035	40	No	No	Food and beverages	Large	3	3	3	718	42.2353	14.0784	48	Female	Divorced	1	High-school	Machine operator	blue collar	1300	1.38741	No	No	4497.5	64.3	1.65	23.618	Normal weight	86.9	No	No	100	80	No	No	No	No	No	No	NORMAL	0	0	0
4036	40	No	No	Food and beverages	Large	3	3	3	98	36.75	12.25	40	Male	Married	3	Illiterate	Machine operator	blue collar	937	1	No	No	960	87.3	1.63	32.8578	Obesity I	109	No	No	120	80	No	No	No	No	No	No	NORMAL	0	0	0
4037	40	No	No	Food and beverages	Large	3	3	3	718	42.2353	14.0784	42	Female	Married	1	Elementary school	Production worker	blue collar	937	1	No	No	3360	80.7	1.58	32.3265	Obesity I	100.5	No	No	130	100	No	No	No	No	No	No	ELEVADA	0	0	0
4038	40	No	No	Food and beverages	Large	3	3	3	98	36.75	12.25	41	Male	Married	2	Elementary school	Machine operator	blue collar	937	1	No	No	396	63.9	1.65	23.4711	Normal weight	88.9	No	No	130	70	No	No	No	No	No	No	NORMAL	0	0	0
4039	40	No	No	Food and beverages	Large	3	3	3	718	42.2353	14.0784	30	Female	Married	2	High-school	Manufacturing technician	white collar	937	1	No	No	6720	62.4	1.58	24.996	Normal weight	84.5	No	No	90	60	No	No	No	No	Yes	No	NORMAL	0	0	0
4040	40	No	No	Food and beverages	Large	3	3	3	718	42.2353	14.0784	29	Female	Single	1	High-school	Production worker	blue collar	937	1	No	No	3840	49.6	1.46	23.2689	Normal weight	70.1	No	No	100	70	No	No	No	No	No	No	NORMAL	0	0	0
4041	40	No	No	Food and beverages	Large	3	3	3	718	42.2353	14.0784	37	Female	Married	1	Middle school	Production worker	blue collar	937	1	No	No	3880	57.7	1.53	24.6486	Normal weight	75.6	No	No	110	80	No	No	No	No	No	No	NORMAL	0	0	0
4042	40	No	No	Food and beverages	Large	3	3	3	718	42.2353	14.0784	38	Female	Married	3	High-school	Administrative assistant	white collar	937	1	No	No	2520	49.7	1.53	21.2311	Normal weight	75.7	No	No	90	60	No	No	No	No	No	No	NORMAL	0	0	0
4043	40	No	No	Food and beverages	Large	3	3	3	718	42.2353	14.0784	45	Female	Married	2	Middle school	Production worker	blue collar	937	1	No	No	4800	69.2	1.45	32.9132	Obesity I	93.7	No	No	120	80	No	No	No	No	No	No	NORMAL	0	0	0
4044	40	No	No	Food and beverages	Large	3	3	3	718	42.2353	14.0784	33	Female	Married	0	Middle school	Production worker	blue collar	937	1	No	No	1020	102.9	1.55	42.8304	Obesity III	106.3	No	No	130	90	No	No	No	No	No	No	ELEVADA	0	0	0
4045	40	No	No	Food and beverages	Large	3	3	3	718	42.2353	14.0784	44	Female	Married	1	High-school	Production worker	blue collar	937	1	No	No	2670	65	1.56	26.7094	Overweight	90.3	No	No	110	70	No	No	No	No	No	No	NORMAL	0	0	0
4046	40	No	No	Food and beverages	Large	3	3	3	718	42.2353	14.0784	37	Female	Single	1	High-school	Production worker	blue collar	937	1	No	Yes	4320	58.9	1.5	26.1778	Overweight	86.2	No	No	120	80	No	No	No	No	No	No	NORMAL	0	0	0
4047	40	No	No	Food and beverages	Large	3	3	3	718	42.2353	14.0784	32	Female	Single	1	Middle school	Production worker	blue collar	937	1	No	No	1440	87.6	1.52	37.9155	Obesity I	98.1	No	No	110	70	No	No	No	No	No	No	NORMAL	0	0	0
4048	40	No	No	Food and beverages	Large	3	3	3	98	36.75	12.25	25	Male	Single	0	High-school	Machine operator	blue collar	1908	2.03629	No	No	1200	94.6	1.77	30.1957	Obesity I	101	No	No	140	70	No	No	No	No	No	No	ELEVADA	0	0	0
4049	40	No	No	Food and beverages	Large	3	3	3	718	42.2353	14.0784	24	Female	Married	0	High-school	Production worker	blue collar	937	1	No	No	960	71.8	1.58	28.7614	Overweight	85.3	No	No	110	70	No	No	No	No	No	No	NORMAL	0	0	0
4050	40	No	No	Food and beverages	Large	3	3	3	98	36.75	12.25	21	Male	Single	0	Graduate	Manufacturing technician	white collar	477	0.509072	Yes	No	2379	49.4	1.66	17.9271	Underweight	65.3	No	No	90	60	No	No	No	No	No	No	NORMAL	0	0	0
4051	40	No	No	Food and beverages	Large	3	3	3	718	42.2353	14.0784	42	Female	Married	1	Elementary school	Production worker	blue collar	1400	1.49413	No	No	1680	75.6	1.5	33.6	Obesity I	99.3	No	No	110	80	No	No	No	No	No	No	NORMAL	0	0	0
4052	40	No	No	Food and beverages	Large	3	3	3	718	42.2353	14.0784	35	Female	Married	3	High-school	Production worker	blue collar	937	1	No	No	2619	84.1	1.6	32.8516	Obesity I	97.8	No	No	100	60	No	No	Yes	No	Yes	No	NORMAL	0	0	1
4053	40	No	No	Food and beverages	Large	3	3	3	718	42.2353	14.0784	43	Female	Single	1	High-school	Production worker	blue collar	937	1	No	No	3360	99	1.64	36.8084	Obesity I	96	No	No	130	90	No	No	No	No	No	No	ELEVADA	0	0	0
4054	40	No	No	Food and beverages	Large	3	3	3	718	42.2353	14.0784	39	Female	Single	1	High-school	Production worker	white collar	937	1	No	No	5040	76.2	1.57	30.914	Obesity I	98	No	No	120	80	No	No	No	No	No	No	NORMAL	0	0	0
4055	40	No	No	Food and beverages	Large	3	3	3	98	36.75	12.25	25	Male	Single	0	Middle school	Production worker	blue collar	938	1.00107	No	Yes	2760	80	1.73	26.7299	Overweight	89	No	No	100	70	No	No	No	No	No	No	NORMAL	0	0	0
4056	40	No	No	Food and beverages	Large	3	3	3	98	36.75	12.25	44	Male	Married	3	Middle school	Machine operator	blue collar	1400	1.49413	No	No	400	82.2	1.7	28.4429	Overweight	101.5	No	No	130	90	No	No	Yes	No	No	No	ELEVADA	0	0	1
4057	40	No	No	Food and beverages	Large	3	3	3	98	36.75	12.25	29	Male	Married	2	High-school	Production worker	blue collar	937	1	No	No	2430	71.7	1.74	23.6821	Normal weight	81.7	No	No	140	90	No	No	No	No	No	No	ELEVADA	0	0	0
4058	40	No	No	Food and beverages	Large	3	3	3	718	42.2353	14.0784	27	Female	Married	1	Middle school	Production worker	blue collar	937	1	No	No	3345	61.5	1.5	27.3333	Overweight	84.3	No	No	110	70	No	No	No	No	No	No	NORMAL	0	0	0
4059	40	No	No	Food and beverages	Large	3	3	3	718	42.2353	14.0784	51	Female	Married	3	Elementary school	Production worker	blue collar	937	1	No	No	3360	80.1	1.61	30.9016	Obesity I	102.5	No	No	110	70	No	No	No	No	No	No	NORMAL	0	0	0
4101	41	Yes	No	Non-metallic minerals	Large	15	2	2	453	23.8421	11.921	52	Male	Married	2	Elementary school	Machine operator	blue collar	937	1	No	No	760	77.8	1.68	27.5652	Overweight	97.1	No	No	113	80	No	No	No	No	No	No	NORMAL	0	0	0
4102	41	Yes	Yes	Non-metallic minerals	Large	15	2	2	453	23.8421	11.921	29	Male	Married	1	Middle school	Plant manager	white collar	2623.5	2.79989	No	No	2160	89.8	1.73	30.0043	Obesity I	88.3	No	No	125	80	No	No	No	No	No	No	NORMAL	0	0	0	No	No	No	1.60197	0.242725
4103	41	Yes	Yes	Non-metallic minerals	Large	15	2	2	453	23.8421	11.921	29	Male	Single	3	High-school	Production worker	white collar	977	1.04269	No	No	320	86.9	1.74	28.7026	Overweight	100.2	No	No	136	76	No	No	No	No	No	No	ELEVADA	0	0	0	Yes	Yes	Yes	2.37768	0.411819
4104	41	Yes	No	Non-metallic minerals	Large	15	2	2	453	23.8421	11.921	70	Male	Married	4	Post graduate	Manufacturing technician	white collar	37480	40	Yes	No	0	86.3	1.65	31.6988	Obesity I	109.8	Yes	Yes	140	60	Yes	Yes	Yes	Yes	Yes	Yes	ELEVADA	1	1	1
4105	41	Yes	Yes	Non-metallic minerals	Large	15	2	2	453	23.8421	11.921	29	Male	Married	2	High-school	Manufacturing technician	white collar	2300	2.45464	Yes	No	2193	76.5	1.71	26.1619	Overweight	94	No	No	110	74	No	No	No	No	No	No	NORMAL	0	0	0	No	No	No	1.60407	0.324551
4106	41	Yes	No	Non-metallic minerals	Large	15	2	2	453	23.8421	11.921	23	Male	Married	0	High-school	Administrative assistant	white collar	1431	1.52721	No	No	6720	85	1.77	27.1314	Overweight	85.3	No	No	110	65	No	No	No	No	No	No	NORMAL	0	0	0
4107	41	Yes	Yes	Non-metallic minerals	Large	15	2	2	453	23.8421	11.921	28	Male	Married	1	Elementary school	Manufacturing technician	white collar	1200	1.28068	No	Yes	0	95.3	1.74	31.4771	Obesity I	104.5	No	No	140	80	No	No	No	No	No	No	ELEVADA	0	0	0	Yes	Yes	Yes	4.49261	99.9983
4108	41	Yes	Yes	Non-metallic minerals	Large	15	2	2	453	23.8421	11.921	27	Male	Single	0	Middle school		blue collar	1431	1.52721	No	No	1200	71.2	1.74	23.517	Normal weight	76.7	No	No	110	55	No	No	No	No	No	No	NORMAL	0	0	0	No	No	No	0.573396	0.029244
4109	41	Yes	No	Non-metallic minerals	Large	15	2	2	453	23.8421	11.921	53	Male	Married	2	Elementary school	Production worker	blue collar	1500	1.60085	No	No	480	74.1	1.74	24.4748	Normal weight	90.8	No	No	130	65	No	No	No	No	No	No	ELEVADA	0	0	0
4110	41	Yes	Yes	Non-metallic minerals	Large	15	2	2	453	23.8421	11.921	24	Male	Single	1	Middle school	Machine operator	blue collar	1002	1.06937	No	No	2165	77.1	1.7	26.6782	Overweight	92.5	No	No	120	85	No	No	No	No	No	No	ELEVADA	0	0	0	No	No	No	0.556703	0.026894
4111	41	Yes	Yes	Non-metallic minerals	Large	15	2	2	453	23.8421	11.921	21	Male	Single	0	High-school	Production worker	white collar	1030	1.09925	No	No	0	78.2	1.73	26.1285	Overweight	91.3	No	No	120	70	No	No	No	No	No	No	NORMAL	0	0	0	No	No	No	0.360052	0.009746
4112	41	Yes	Yes	Non-metallic minerals	Large	15	2	2	453	23.8421	11.921	59	Male	Widower	2	Middle school	Production worker	blue collar	1400	1.49413	No	No	6960	69.1	1.66	25.0762	Overweight	87	No	No	126	60	No	No	No	No	No	No	NORMAL	0	0	0	No	No	No	16.1957	9.49961
4113	41	Yes	No	Non-metallic minerals	Large	15	2	2	47	47	23.5	43	Female	Married	1	High-school	Administrative assistant	white collar	1908	2.03629	Yes	No	1440	50.2	1.56	20.6279	Normal weight	75.3	No	No	150	92	No	No	No	No	No	No	NORMAL	0	0	0
4114	41	Yes	Yes	Non-metallic minerals	Large	15	2	2	453	23.8421	11.921	29	Male	Widower	0	Middle school	Machine operator	blue collar	1908	2.03629	Yes	No	7680	87.1	1.75	28.4408	Overweight	89.5	No	No	120	70	No	No	No	No	No	No	NORMAL	0	0	0	No	No	No	1.345	0.169047
4115	41	Yes	No	Non-metallic minerals	Large	15	2	2	453	23.8421	11.921	25	Male	Married	0	High-school	Manufacturing technician	white collar	1200	1.28068	Yes	No	3120	86.7	1.81	26.4644	Overweight	81.4	No	No	114	42	No	No	No	No	No	No	NORMAL	0	0	0
4116	41	Yes	Yes	Non-metallic minerals	Large	15	2	2	453	23.8421	11.921	36	Male	Married	1	Middle school	Production worker	white collar	937	1	No	Yes	3276	46.3	1.58	18.5467	Normal weight	71	No	No	120	70	No	No	No	No	No	No	NORMAL	0	0	0	No	No	No	5.24153	99.9998
4117	41	Yes	No	Non-metallic minerals	Large	15	2	2	453	23.8421	11.921	27	Male	Single	0	Graduate	Administrative assistant	white collar	1908	2.03629	Yes	No	1200	76.5	1.76	24.6965	Normal weight	81.7	No	No	124	58	No	No	No	No	No	No	NORMAL	0	0	0
4118	41	Yes	Yes	Non-metallic minerals	Large	15	2	2	453	23.8421	11.921	36	Male	Married	2	High-school	Machine operator	blue collar	1400	1.49413	No	No	2010	99.9	1.71	34.1644	Obesity I	105.6	No	No	112	74	No	No	No	No	No	No	NORMAL	0	0	0	No	No	No	2.43911	0.472312
4119	41	Yes	Yes	Non-metallic minerals	Large	15	2	2	453	23.8421	11.921	60	Male	Married	1	Middle school	Machine operator	blue collar	1093.41	1.16693	No	No	1155	62.7	1.56	25.7643	Overweight	87.3	No	No	128	82	No	No	No	No	No	No	NORMAL	0	0	0	No	No	No	12.8516	8.12886
4120	41	Yes	Yes	Non-metallic minerals	Large	15	2	2	453	23.8421	11.921	44	Male	Married	2	Graduate	Manufacturing technician	white collar	2385	2.54536	No	No	300	61.2	1.61	23.6102	Normal weight	84.5	No	No	105	65	No	No	No	No	No	No	NORMAL	0	0	0	No	No	No	3.87464	1.26448
4121	41	Yes	Yes	Non-metallic minerals	Large	15	2	2	453	23.8421	11.921	67	Male	Married	2	Post graduate	Plant manager	white collar	15000	16.0085	Yes	No	2286	105.8	1.69	37.0435	Obesity I	118.5	Yes	Yes	140	88	No	No	Yes	Yes	No	No	ELEVADA	0	0	1	Yes	Yes	Yes	30.6006	20.4132
4122	41	Yes	No	Non-metallic minerals	Large	15	2	2	453	23.8421	11.921	30	Male	Married	2	Elementary school	Machine operator	blue collar	1020	1.08858	No	No	259	71.1	1.79	22.1903	Normal weight	85.5	No	No	110	70	No	No	No	No	No	No	NORMAL	0	0	0
4123	41	Yes	Yes	Non-metallic minerals	Large	15	2	2	453	23.8421	11.921	38	Male	Married	2	Graduate	Production worker	blue collar	1550	1.65422	Yes	No	2175	111.1	1.79	34.6743	Obesity I	111.5	No	No	160	110	No	No	No	No	Yes	No	ELEVADA	0	0	0	Yes	Yes	Yes	7.44761	2.09844
4124	41	Yes	Yes	Non-metallic minerals	Large	15	2	2	453	23.8421	11.921	40	Male	Married	1	Middle school	Manufacturing technician	white collar	1431	1.52721	No	Yes	0	61.4	1.62	23.3958	Normal weight	86.7	No	No	120	80	No	No	No	No	No	No	NORMAL	0	0	0	No	No	No	8.27546	100
4125	41	Yes	No	Non-metallic minerals	Large	15	2	2	453	23.8421	11.921	28	Male	Married	0	High-school	Administrative assistant	white collar	2385	2.54536	No	No	2880	56.5	1.7	19.5502	Normal weight	71.8	No	No	114	60	No	No	No	No	No	No	NORMAL	0	0	0
4126	41	Yes	Yes	Non-metallic minerals	Large	15	2	2	453	23.8421	11.921	29	Male	Married	1	Elementary school	Manufacturing technician	white collar	1220	1.30203	No	No	20	74.9	1.63	28.1907	Overweight	97	No	No	115	80	No	No	No	No	No	No	NORMAL	0	0	0	No	No	No	1.11395	0.109925
4127	41	Yes	No	Non-metallic minerals	Large	15	2	2	453	23.8421	11.921	61	Male	Married	2	High-school	Administrative assistant	white collar	2000	2.13447	No	No	490	78.4	1.64	29.1493	Overweight	100.5	No	No	130	85	No	No	No	No	No	No	ELEVADA	0	0	0
4128	41	Yes	Yes	Non-metallic minerals	Large	15	2	2	453	23.8421	11.921	57	Male	Married	2		Production worker	blue collar	2862	3.05443	No	No	720	57.4	1.56	23.5865	Normal weight	82.5	No	No	120	70	No	No	No	No	No	No	NORMAL	0	0	0	No	No	No	12.7666	7.034
4129	41	Yes	No	Non-metallic minerals	Large	15	2	2	453	23.8421	11.921	49	Male	Married	2	High-school	Plant manager	white collar	3339	3.5635	No	No	0	76.8	1.63	28.9059	Overweight	98.5	Yes	Yes	130	70	No	No	No	No	No	No	ELEVADA	0	0	0
4130	41	Yes	Yes	Non-metallic minerals	Large	15	2	2	453	23.8421	11.921	23	Male	Married	0	Middle school	Production worker	blue collar	1300	1.38741	No	No	1800	79.8	1.73	26.6631	Overweight	90.8	No	No	130	90	No	No	No	No	No	No	ELEVADA	0	0	0	No	No	No	0.769414	0.049697
4131	41	Yes	Yes	Non-metallic minerals	Large	15	2	2	47	47	23.5	48	Female	Divorced	3	Middle school	Machine operator	blue collar	1431	1.52721	No	No	2902.5	66.9	1.49	30.1338	Obesity I	95.8	Yes	Yes	110	64	No	No	No	No	No	No	NORMAL	0	0	0	Yes	Yes	Yes	2.49594	0.744484
4132	41	Yes	Yes	Non-metallic minerals	Large	15	2	2	453	23.8421	11.921	39	Male	Married	3	High-school	Plant manager	white collar	1431	1.52721	Yes	No	480	84.9	1.78	26.7959	Overweight	85.8	No	No	120	60	No	No	No	No	No	No	NORMAL	0	0	0	No	No	No	3.38454	0.832486
4133	41	Yes	Yes	Non-metallic minerals	Large	15	2	2	453	23.8421	11.921	47	Male	Single	3	High-school	Plant manager	white collar	2500	2.66809	No	No	1920	97.9	1.71	33.4804	Obesity I	110.3	No	No	170	110	No	No	No	No	Yes	No	ELEVADA	0	0	0	Yes	Yes	Yes	15.9599	6.55618
4134	41	Yes	Yes	Non-metallic minerals	Large	15	2	2	453	23.8421	11.921	28	Male	Married	2	Elementary school	Machine operator	blue collar	963	1.02775	No	Yes	1084	78.7	1.71	26.9143	Overweight	97.5	No	No	115	82	No	No	No	No	No	No	NORMAL	0	0	0	No	No	No	1.82324	87.4113
4135	41	Yes	Yes	Non-metallic minerals	Large	15	2	2	453	23.8421	11.921	28	Male	Single	1	High-school	Production worker	white collar	1100	1.17396	No	No	1440	103.2	1.66	37.451	Obesity I	108	Yes	No	120	76	No	No	No	No	No	No	NORMAL	0	0	0	Yes	Yes	Yes	1.89515	0.364929
4136	41	Yes	Yes	Non-metallic minerals	Large	15	2	2	453	23.8421	11.921	27	Male	Married	1	High-school	Manufacturing technician	white collar	1500	1.60085	No	No	440	75.9	1.82	22.9139	Normal weight	82.9	No	No	90	50	No	No	No	No	No	No	NORMAL	0	0	0	No	No	No	0.495759	0.038123
4137	41	Yes	Yes	Non-metallic minerals	Large	15	2	2	453	23.8421	11.921	48	Male	Married	1	High-school	Manufacturing technician	white collar	1100	1.17396	No	No	5497.5	85.3	1.61	32.9077	Obesity I	106.3	No	No	104	20	Yes	No	No	No	No	No	NORMAL	1	0	0	No	No	No	8.80205	0.003721
4138	41	Yes	Yes	Non-metallic minerals	Large	15	2	2	453	23.8421	11.921	35	Male	Married	3	High-school	Production worker	blue collar	1200	1.28068	No	No	120	63.5	1.69	22.2331	Normal weight	85.7	No	No	120	80	No	No	No	No	No	No	NORMAL	0	0	0	No	No	No	2.35647	0.439544
4139	41	Yes	Yes	Non-metallic minerals	Large	15	2	2	453	23.8421	11.921	34	Male	Married	1	Graduate	Manufacturing technician	white collar	1908	2.03629	Yes	No	570	71.6	1.77	22.8542	Normal weight	94.5	No	No	130	90	No	No	No	No	No	No	ELEVADA	0	0	0	Yes	Yes	Yes	5.79894	2.273
4140	41	Yes	Yes	Non-metallic minerals	Large	15	2	2	453	23.8421	11.921	43	Male	Single	1	Middle school	Production worker	blue collar	1450	1.54749	No	No	120	123.1	1.71	42.0984	Obesity III	125.7	Yes	No	170	110	No	No	No	No	No	No	ELEVADA	0	0	0	Yes	Yes	Yes	8.69686	2.4754
4201	42	No	No	Textile	Large	9	1	1	488	12.5128	12.5128	29	Male	Married	1	Graduate	Machine operator	blue collar	1405.5	1.5	No	No	840	55.9	1.64	20.7838	Normal weight	70.2	No	No	110	70	No	No	No	No	No	No	NORMAL	0	0	0
4202	42	No	Yes	Textile	Large	9	1	1	488	12.5128	12.5128	44	Male	Married	2	High-school	Machine operator	blue collar	1200	1.28068	No	No	594	78.2	1.64	29.075	Overweight	95.8	No	No	120	80	No	No	No	No	No	No	NORMAL	0	0	0	No	No	No	4.35823	1.31612
4203	42	No	Yes	Textile	Large	9	1	1	488	12.5128	12.5128	38	Male	Married	0	High-school	Machine operator	blue collar	1250	1.33404	No	No	1440	75	1.65	27.5482	Overweight	97.6	Yes	Yes	120	80	No	No	No	No	No	No	NORMAL	0	0	0	Yes	Yes	Yes	5.53199	1.30753
4204	42	No	No	Textile	Large	9	1	1	488	12.5128	12.5128	23	Male	Married	0	High-school	Machine operator	blue collar	1200	1.28068	No	No	3186	72.9	1.74	24.0785	Normal weight	82	No	No	130	80	No	No	No	No	No	No	ELEVADA	0	0	0
4205	42	No	Yes	Textile	Large	9	1	1	488	12.5128	12.5128	24	Male	Married	0	High-school	Production worker	blue collar	1200	1.28068	No	No	1200	58.5	1.69	20.4825	Normal weight	73	No	No	100	70	No	No	No	No	No	No	NORMAL	0	0	0	No	No	No	0.348905	0.012226
4206	42	No	Yes	Textile	Large	9	1	1	488	12.5128	12.5128	36	Male	Married	1	Middle school	Machine operator	blue collar	1300	1.38741	Yes	No	480	72.4	1.67	25.9601	Overweight	94.1	No	No	110	70	No	No	No	No	No	No	NORMAL	0	0	0	No	No	No	1.59863	0.223924
4207	42	No	Yes	Textile	Large	9	1	1	29	4.83333	4.83333	56	Female	Married	3	Elementary school	Machine operator	blue collar	1200	1.28068	No	No	1394	50.1	1.54	21.125	Normal weight	71.9	Yes	Yes	120	80	No	No	No	No	No	No	NORMAL	0	0	0	No	No	No	5.90058	2.30376
4208	42	No	No	Textile	Large	9	1	1	488	12.5128	12.5128	22	Male	Single	0	High-school	Machine operator	blue collar	1200	1.28068	Yes	No	320	55	1.69	19.257	Normal weight	67.9	No	No	80	60	No	No	No	No	No	No	NORMAL	0	0	0
4209	42	No	No	Textile	Large	9	1	1	488	12.5128	12.5128	24	Male	Married	0	High-school	Machine operator	blue collar	1200	1.28068	No	No	480	76.7	1.81	23.412	Normal weight	86.2	No	No	100	70	No	No	No	No	No	No	NORMAL	0	0	0
4210	42	No	Yes	Textile	Large	9	1	1	488	12.5128	12.5128	26	Male	Single	0	Middle school	Machine operator	blue collar	937	1	No	No	3966	74.4	1.68	26.3605	Overweight	79.6	No	No	110	80	No	No	No	No	No	No	NORMAL	0	0	0	No	No	No	0.566823	0.032986
4211	42	No	No	Textile	Large	9	1	1	488	12.5128	12.5128	21	Male	Single	0	High-school	Machine operator	blue collar	1000	1.06724	No	No	1620	58.4	1.7	20.2076	Normal weight	72.2	No	No	100	70	No	No	No	No	No	No	NORMAL	0	0	0
4212	42	No	Yes	Textile	Large	9	1	1	488	12.5128	12.5128	36	Male	Married	0	Graduate	Production worker	white collar	1500	1.60085	No	No	960	75.4	1.83	22.5149	Normal weight	84.6	No	No	110	90	No	No	No	No	No	No	ELEVADA	0	0	0	No	No	No	2.10037	0.383618
4213	42	No	Yes	Textile	Large	9	1	1	488	12.5128	12.5128	34	Male	Married	2	Middle school	Machine operator	blue collar	1000	1.06724	No	No	1340	64	1.74	21.1389	Normal weight	76.6	No	No	130	90	No	No	No	No	No	No	ELEVADA	0	0	0	No	No	No	2.02304	0.265061
4214	42	No	Yes	Textile	Large	9	1	1	488	12.5128	12.5128	34	Male	Single	3	Middle school	Machine operator	blue collar	1300	1.38741	No	No	720	78.9	1.71	26.9827	Overweight	88.4	No	No	120	80	No	No	No	No	No	No	NORMAL	0	0	0	No	No	No	1.55357	0.188867
4215	42	No	No	Textile	Large	9	1	1	488	12.5128	12.5128	22	Male	Married	0	Middle school	Administrative assistant	white collar	1100	1.17396	No	No	1977	75.6	1.78	23.8606	Normal weight	79.6	No	No	110	60	No	No	No	No	No	No	NORMAL	0	0	0
4216	42	No	No	Textile	Large	9	1	1	488	12.5128	12.5128	24	Male	Single	0	High-school	Machine operator	blue collar	1300	1.38741	No	No	2880	58.1	1.61	22.4143	Normal weight	74.9	No	No	90	60	No	No	No	No	No	No	NORMAL	0	0	0
4217	42	No	No	Textile	Large	9	1	1	488	12.5128	12.5128	43	Male	Married	2	Elementary school	Machine operator	blue collar	1100	1.17396	No	No	120	75.9	1.72	25.6558	Overweight	85	No	No	140	90	No	No	No	No	No	No	ELEVADA	0	0	0
4218	42	No	Yes	Textile	Large	9	1	1	488	12.5128	12.5128	44	Male	Married	2	Middle school	Machine operator	blue collar	1500	1.60085	No	No	226	77.1	1.71	26.3671	Overweight	91	Yes	No	140	90	No	No	No	No	No	No	ELEVADA	0	0	0	Yes	No	Yes	9.21008	3.41781
4219	42	No	Yes	Textile	Large	9	1	1	488	12.5128	12.5128	50	Male	Married	2	Elementary school	Machine operator	blue collar	1600	1.70758	No	No	346.5	70.4	1.72	23.7966	Normal weight	90.5	No	No	120	80	No	No	No	No	No	No	NORMAL	0	0	0	No	No	No	6.70793	2.77843
4220	42	No	Yes	Textile	Large	9	1	1	488	12.5128	12.5128	28	Male	Single	0	High-school	Machine operator	blue collar	1200	1.28068	No	No	2160	72.5	1.72	24.5065	Normal weight	80.1	No	No	110	80	No	No	No	No	No	No	NORMAL	0	0	0	No	No	No	0.555203	0.025778
4221	42	No	No	Textile	Large	9	1	1	488	12.5128	12.5128	38	Male	Married	2	High-school	Manufacturing technician	white collar	3350	3.57524	Yes	No	2097	69.5	1.73	23.2216	Normal weight	85.3	No	No	120	90	No	No	No	No	No	No	ELEVADA	0	0	0
4222	42	No	Yes	Textile	Large	9	1	1	488	12.5128	12.5128	27	Male	Single	0	High-school	Machine operator	blue collar	1200	1.28068	No	No	5859	70.3	1.77	22.4393	Normal weight	78.2	No	No	120	70	No	No	No	No	No	No	NORMAL	0	0	0	No	No	No	0.628901	0.023019
4223	42	No	Yes	Textile	Large	9	1	1	29	4.83333	4.83333	31	Female	Single	1	High-school	Machine operator	blue collar	937	1	No	No	3504	61.1	1.58	24.4752	Normal weight	83.9	No	No	100	70	No	No	No	No	No	No	NORMAL	0	0	0	Yes	Yes	No	0.639117	0.289058
4224	42	No	No	Textile	Large	9	1	1	488	12.5128	12.5128	42	Male	Married	0	Middle school	Machine operator	blue collar	937	1	No	No	3066	104.6	1.7	36.1938	Obesity I	118.8	Yes	Yes	150	100	No	No	No	No	No	No	ELEVADA	0	0	0
4225	42	No	Yes	Textile	Large	9	1	1	488	12.5128	12.5128	58	Male	Married	2	High-school	Production worker	white collar	937	1	No	No	5400	73.7	1.57	29.8998	Overweight	99.9	No	No	120	80	No	No	No	No	No	No	NORMAL	0	0	0	Yes	Yes	No	11.6436	6.72379
4226	42	No	Yes	Textile	Large	9	1	1	488	12.5128	12.5128	24	Male	Married	2	High-school	Machine operator	blue collar	937	1	No	No	1440	86	1.67	30.8365	Obesity I	94.9	No	No	110	70	No	No	No	No	No	No	NORMAL	0	0	0	No	No	No	0.341037	0.008587
4227	42	No	No	Textile	Large	9	1	1	29	4.83333	4.83333	47	Female	Married	2	High-school	Machine operator	blue collar	937	1	No	No	0	81	1.57	32.8614	Obesity I	90.8	Yes	Yes	110	70	No	No	No	No	No	No	NORMAL	0	0	0
4228	42	No	No	Textile	Large	9	1	1	29	4.83333	4.83333	40	Female	Married	3	Graduate	Production worker	blue collar	937	1	No	No	2916						No	No	110	80	No	No	No	No	No	No	NORMAL	0	0	0
4229	42	No	Yes	Textile	Large	9	1	1	29	4.83333	4.83333	57	Female	Married	0	Middle school	Machine operator	blue collar	937	1	No	No	847.5	66.5	1.51	29.1654	Overweight	87.9	No	No	110	70	Yes	No	No	No	No	No	NORMAL	1	0	0	No	No	No	7.52994	3.51896
4230	42	No	Yes	Textile	Large	9	1	1	488	12.5128	12.5128	32	Male	Married	0	Middle school	Machine operator	blue collar	937	1	No	No	0	76.1	1.77	24.2906	Normal weight	85.8	No	No	120	90	No	No	No	No	No	No	ELEVADA	0	0	0	No	No	No	1.73604	0.234608
4231	42	No	Yes	Textile	Large	9	1	1	488	12.5128	12.5128	58	Male	Married	3	Middle school	Machine operator	blue collar	937	1	No	No	0	68.8	1.65	25.2709	Overweight	92.6	No	No	100	60	No	No	No	No	No	No	NORMAL	0	0	0	No	No	No	7.08013	4.27214
4232	42	No	Yes	Textile	Large	9	1	1	488	12.5128	12.5128	25	Male	Married	0	High-school	Machine operator	blue collar	1100	1.17396	Yes	No	1200	78.9	1.76	25.4713	Overweight	85.9	No	No	110	70	No	No	No	No	No	No	NORMAL	0	0	0	No	No	No	0.617788	0.035477
4233	42	No	Yes	Textile	Large	9	1	1	29	4.83333	4.83333	36	Female	Married	1	High-school	Machine operator	blue collar	954	1.01814	No	No	1920	72.8	1.58	29.162	Overweight	84.1	No	No	90	60	No	No	Yes	No	No	No	NORMAL	0	0	1	No	No	No	0.657367	0.160101
4234	42	No	No	Textile	Large	9	1	1	488	12.5128	12.5128	23	Male	Single	0	High-school	Machine operator	blue collar	1200	1.28068	No	No	1092	58.6	1.64	21.7876	Normal weight	82.1	No	No			No	No	No	No	No	No		0	0	0
4235	42	No	Yes	Textile	Large	9	1	1	488	12.5128	12.5128	20	Male	Single	0		Production worker	white collar	1000	1.06724	No	No	1351	60.5	1.7	20.9343	Normal weight	72.6	No	No	130	70	No	No	No	No	No	No	ELEVADA	0	0	0	No	No	No	0.283219	0.003493
4236	42	No	Yes	Textile	Large	9	1	1	488	12.5128	12.5128	41	Male	Married	0	Middle school	Machine operator	blue collar	1300	1.38741	No	No	960	74.4	1.71	25.4437	Overweight	80.9	No	No	110	70	No	No	No	No	No	No	NORMAL	0	0	0	No	No	No	1.83875	0.337479
4237	42	No	No	Textile	Large	9	1	1	488	12.5128	12.5128	29	Male	Divorced	2	High-school	Manufacturing technician	white collar	3350	3.57524	Yes	No	297	85.2	1.69	29.8309	Overweight	100.5	No	No			No	No	No	No	No	No		0	0	0
4238	42	No	No	Textile	Large	9	1	1	488	12.5128	12.5128	22	Male	Single	0	High-school	Machine operator	blue collar	1100	1.17396	Yes	No	3480	83.9	1.81	25.6097	Overweight	80.5	No	No			No	No	No	No	No	No		0	0	0
4239	42	No	Yes	Textile	Large	9	1	1	488	12.5128	12.5128	20	Male	Married	0	High-school	Machine operator	blue collar	1040	1.10993	No	No	1765	70.2	1.66	25.4754	Overweight	78.8	No	No			No	No	No	No	No	No		0	0	0	No	No	No		2.7e-07
4240	42	No	No	Textile	Large	9	1	1	488	12.5128	12.5128	30	Male	Married	2	High-school	Production worker	blue collar	1200	1.28068	No	No	640	82.2	1.71	28.1112	Overweight	92.3	No	No			No	No	No	No	No	No		0	0	0
4241	42	No	No	Textile	Large	9	1	1	29	4.83333	4.83333	38	Female	Married	3	Post graduate	Plant manager	white collar	937	1	Yes	No	2200	65.4	1.56	26.8738	Overweight	87.8	No	No			No	No	Yes	No	No	No		0	0	1
4242	42	No	No	Textile	Large	9	1	1	488	12.5128	12.5128	23	Male	Married	1	High-school	Machine operator	blue collar	1200	1.28068	No	No	320	76	1.66	27.5802	Overweight	88.8	No	No			No	No	No	No	No	No		0	0	0
4243	42	No	Yes	Textile	Large	9	1	1	488	12.5128	12.5128	52	Male	Married	2	High-school	Machine operator	blue collar	1300	1.38741	No	No	1845	67.5	1.63	25.4055	Overweight	89.2	No	No	120	80	No	No	No	No	No	No	NORMAL	0	0	0	No	No	No	8.13917	3.75546
4244	42	No	No	Textile	Large	9	1	1	488	12.5128	12.5128	23	Male	Married	1	High-school	Machine operator	blue collar	1200	1.28068	No	No	4640	82.7	1.71	28.2822	Overweight	95.5	No	No			No	No	No	No	No	No		0	0	0
4245	42	No	No	Textile	Large	9	1	1	488	12.5128	12.5128	47	Male	Married	2	Middle school	Machine operator	blue collar	1200	1.28068	No	No	537	84.5	1.78	26.6696	Overweight	96.9	No	No	120	70	No	No	No	No	No	No	NORMAL	0	0	0
4246	42	No	Yes	Textile	Large	9	1	1	488	12.5128	12.5128	31	Male	Single	0	High-school	Production worker	blue collar	1250	1.33404	No	No	3180	67.6	1.82	20.4082	Normal weight	72.3	No	No	100	80	No	No	No	No	No	No	NORMAL	0	0	0	No	No	No	0.646309	0.045383
4301	43	No	Yes	Non-metallic minerals	Large	6	2	2	570	27.1429	13.5714	30	Male	Single	1	High-school	Machine operator	blue collar	1700	1.78197	Yes	No	120	93.5	1.75	30.5306	Obesity I	105.6	No	No	130	90	No	No	Yes	No	No	No	ELEVADA	0	0	1	Yes	Yes	Yes	2.80034	0.645327
4302	43	No	Yes	Non-metallic minerals	Large	6	2	2	570	27.1429	13.5714	33	Male	Married	3	Middle school	Machine operator	blue collar	1200	1.25786	No	No	0	83	1.66	30.1205	Obesity I	92	Yes	Yes	160	100	No	No	No	No	No	No	ELEVADA	0	0	0	No	No	No	5.15639	0.728112
4303	43	No	Yes	Non-metallic minerals	Large	6	2	2	30	30	15	40	Female	Single	1	Middle school	Production worker	white collar	1200	1.25786	No	No	960	78.8	1.51	34.5599	Obesity I	103.1	No	No	120	90	No	No	No	No	No	No	ELEVADA	0	0	0	Yes	Yes	Yes	2.8683	0.986588
4304	43	No	No	Non-metallic minerals	Large	6	2	2	570	27.1429	13.5714	30	Male	Married	3	High-school	Administrative assistant	white collar	1650	1.72956	No	No	1196	54.6	1.58	21.8715	Normal weight	77.8	No	No	120	80	No	No	No	No	No	No	NORMAL	0	0	0
4305	43	No	Yes	Non-metallic minerals	Large	6	2	2	570	27.1429	13.5714	34	Male	Married	2	High-school	Manufacturing technician	white collar	1700	1.78197	No	No	0	67	1.71	22.913	Normal weight	80.9	No	No	110	80	No	No	No	No	No	No	NORMAL	0	0	0	No	No	No	2.21255	0.461158
4306	43	No	No	Non-metallic minerals	Large	6	2	2	570	27.1429	13.5714	48	Male	Married	2	High-school	Manufacturing technician	white collar	1800	1.88679	No	No	1440	87.3	1.76	28.3117	Overweight	93.9	No	No	120	90	No	No	No	No	No	No	ELEVADA	0	0	0
4307	43	No	Yes	Non-metallic minerals	Large	6	2	2	570	27.1429	13.5714	48	Male	Married	0	High-school	Production worker	blue collar	1000	1.88679	No	Yes	0	65.1	1.61	25.1148	Overweight	84.3	No	No	100	70	No	No	No	No	No	No	NORMAL	0	0	0	Yes	No	No	11.9793	100
4308	43	No	No	Non-metallic minerals	Large	6	2	2	570	27.1429	13.5714	35	Male	Married	2	Middle school	Production worker	white collar	1800	1.88679	Yes	No	0	66.4	1.69	23.2485	Normal weight	86.7	No	No	110	60	No	No	No	No	Yes	No	NORMAL	0	0	0
4309	43	No	Yes	Non-metallic minerals	Large	6	2	2	570	27.1429	13.5714	24	Male	Single	1	High-school	Production worker	blue collar	1100	1.15304	No	No	4960	85.5	1.79	26.6846	Overweight	88.5	No	No	120	80	No	No	No	No	No	No	NORMAL	0	0	0	No	No	No	0.674917	0.03743
4310	43	No	Yes	Non-metallic minerals	Large	6	2	2	570	27.1429	13.5714	36	Male	Married	0	High-school	Production worker	blue collar	1900	1.99161	No	No	377	79.5	1.62	30.4805	Obesity I	92.4	No	No	120	90	No	No	No	No	No	No	ELEVADA	0	0	0	No	No	No	2.57214	0.506985
4311	43	No	Yes	Non-metallic minerals	Large	6	2	2	570	27.1429	13.5714	36	Male	Single	0	Middle school	Production worker	blue collar	1700	1.78197	No	No	666.5	89.9	1.68	31.8523	Obesity I	102.7	No	No	120	90	No	No	No	No	No	No	ELEVADA	0	0	0	No	No	No	2.8804	0.63378
4312	43	No	Yes	Non-metallic minerals	Large	6	2	2	570	27.1429	13.5714	34	Male	Married	1	High-school	Manufacturing technician	white collar	1510	1.58281	No	No	1280	66.6	1.58	26.6784	Overweight	91	No	No	120	90	No	No	No	No	No	No	ELEVADA	0	0	0	No	No	No	2.15979	0.390585
4313	43	No	Yes	Non-metallic minerals	Large	6	2	2	570	27.1429	13.5714	38	Male	Married	1	Elementary school	Machine operator	blue collar	1622	1.70021	No	No	0	82	1.74	27.0842	Overweight	92.3	No	No	130	100	No	No	No	No	No	No	ELEVADA	0	0	0	Yes	No	Yes	4.43827	1.14939
4314	43	No	Yes	Non-metallic minerals	Large	6	2	2	570	27.1429	13.5714	34	Male	Single	3	High-school	Production worker	blue collar	1700	1.78197	Yes	No	0	76.2	1.6	29.7656	Overweight	92.4	No	No	110	90	No	No	Yes	No	No	No	ELEVADA	0	0	1	No	No	No	2.12334	0.42738
4315	43	No	Yes	Non-metallic minerals	Large	6	2	2	570	27.1429	13.5714	34	Male	Married	1	Middle school	Machine operator	blue collar	1400	1.46751	No	No	0	74.8	1.77	23.8756	Normal weight	86.3	No	No	120	80	No	No	No	No	No	No	NORMAL	0	0	0	No	No	No	3.00104	0.730423
4316	43	No	Yes	Non-metallic minerals	Large	6	2	2	570	27.1429	13.5714	27	Male	Single	0	High-school	Machine operator	blue collar	937	1	No	No	600	80.2	1.71	27.4272	Overweight	84.5	No	No	110	70	No	No	No	No	No	No	NORMAL	0	0	0	No	No	No	1.01995	0.125232
4317	43	No	No	Non-metallic minerals	Large	6	2	2	570	27.1429	13.5714	31	Male	Single	0	High-school	Machine operator	blue collar	1300	1.36268	No	No	198	90.2	1.81	27.5327	Overweight	96.6	No	No	120	80	No	No	No	No	No	No	NORMAL	0	0	0
4318	43	No	No	Non-metallic minerals	Large	6	2	2	570	27.1429	13.5714	28	Male	Married	1	High-school	Production worker	blue collar	1200	1.25786	No	No	280	75.1	1.62	28.6161	Overweight	89.7	No	No	120	90	No	No	No	No	No	No	ELEVADA	0	0	0
4319	43	No	No	Non-metallic minerals	Large	6	2	2	570	27.1429	13.5714	24	Male	Single	0	High-school	Production worker	blue collar	1100	1.15304	No	No	4164.25	67.8	1.7	23.4602	Normal weight	82.3	No	No	110	80	No	No	No	No	No	No	NORMAL	0	0	0
4320	43	No	Yes	Non-metallic minerals	Large	6	2	2	570	27.1429	13.5714	31	Male	Married	0	High-school	Manufacturing technician	blue collar	2650	2.77778	Yes	No	4590	81.3	1.75	26.5469	Overweight	93.2	No	No	130	80	No	No	No	No	No	No	ELEVADA	0	0	0	No	No	No	1.59277	0.168354
4321	43	No	No	Non-metallic minerals	Large	6	2	2	570	27.1429	13.5714	24	Male	Married	1	High-school	Production worker	blue collar	1100	1.15304	No	No	720	76.5	1.73	25.5605	Overweight	90.3	No	No	120	90	No	No	No	No	No	No	ELEVADA	0	0	0
4322	43	No	Yes	Non-metallic minerals	Large	6	2	2	570	27.1429	13.5714	26	Male	Single	0	High-school	Machine operator	blue collar	1416	1.48428	Yes	No	4620	88.6	1.74	29.2641	Overweight	89.8	No	No	120	80	No	No	No	No	No	No	NORMAL	0	0	0	No	No	No	1.03621	0.112766
4323	43	No	Yes	Non-metallic minerals	Large	6	2	2	570	27.1429	13.5714	36	Male	Married	2	High-school	Plant manager	white collar	3400	3.56394	No	No	148.5	88.2	1.705	30.3403	Obesity I	98	Yes	No	140	90	No	No	No	No	Yes	No	ELEVADA	0	0	0	Yes	Yes	Yes	5.50361	1.57687
4324	43	No	Yes	Non-metallic minerals	Large	6	2	2	570	27.1429	13.5714	29	Male	Married	1	Middle school	Production worker	blue collar	1150	1.20545	No	No	480	68.2	1.7	23.5986	Normal weight	86	No	No	120	80	No	No	No	No	No	No	NORMAL	0	0	0	No	No	No	2.30722	0.567685
4325	43	No	Yes	Non-metallic minerals	Large	6	2	2	570	27.1429	13.5714	34	Male	Single	0	High-school	Machine operator	blue collar	1500	1.57233	No	No	0	69.4	1.66	25.1851	Overweight	90.5	No	No	120	80	No	No	No	No	No	No	NORMAL	0	0	0	No	No	No	2.31863	0.446835
4326	43	No	Yes	Non-metallic minerals	Large	6	2	2	570	27.1429	13.5714	30	Male	Single	1	Middle school	Machine operator	blue collar	937	0.98218	No	No	691.25	60.1	1.625	22.7598	Normal weight	79.8	No	No	120	80	No	No	No	No	No	No	NORMAL	0	0	0	No	No	No	1.36931	0.158657
4327	43	No	Yes	Non-metallic minerals	Large	6	2	2	570	27.1429	13.5714	60	Male	Married	6	Elementary school	Machine operator	blue collar	1200	1.25786	No	No	0	80.6	1.7	27.8893	Overweight	94.3	Yes	Yes	180	120	No	No	No	No	No	No	ELEVADA	0	0	0	Yes	Yes	Yes	42.7542	22.3714
4328	43	No	Yes	Non-metallic minerals	Large	6	2	2	570	27.1429	13.5714	22	Male	Single	0	Graduate	Production worker	blue collar	1050	1.1206	No	No	0	76.5	1.73	25.5605	Overweight	83.7	No	No	100	70	No	No	No	No	No	No	NORMAL	0	0	0	No	No	No	0.387535	0.022889
4329	43	No	Yes	Non-metallic minerals	Large	6	2	2	570	27.1429	13.5714	24	Male	Married	0	High-school	Production worker	blue collar	1200	1.28068	No	No	792	75.7	1.68	26.8211	Overweight	90.6	No	No	110	60	No	No	No	No	No	No	NORMAL	0	0	0	No	No	No	0.519221	0.026489
4330	43	No	No	Non-metallic minerals	Large	6	2	2	570	27.1429	13.5714	22	Male	Single	0	High-school	Production worker	blue collar	1200	1.25786	No	No	0	69.4	1.76	22.4044	Normal weight	76.5	No	No	130	80	No	No	No	No	No	No	ELEVADA	0	0	0
4331	43	No	No	Non-metallic minerals	Large	6	2	2	570	27.1429	13.5714	43	Male	Single	0	High-school	Production worker	blue collar	1500	1.57233	No	No	0	71.1	1.76	22.9533	Normal weight	90.1	No	No	120	80	No	No	No	No	No	No	NORMAL	0	0	0
4332	43	No	No	Non-metallic minerals	Large	6	2	2	570	27.1429	13.5714	41	Male	Married	1	Elementary school	Manufacturing technician	blue collar	1620	1.69811	No	No	198	71.8	1.74	23.7152	Normal weight	80.3	No	No	160	110	No	No	No	No	No	No	ELEVADA	0	0	0
4333	43	No	No	Non-metallic minerals	Large	6	2	2	570	27.1429	13.5714	32	Male	Married	2	High-school	Production worker	blue collar	1100	1.15304	No	No	480	77.5	1.69	27.1349	Overweight	94	No	No	130	90	No	No	No	No	No	No	ELEVADA	0	0	0
4334	43	No	Yes	Non-metallic minerals	Large	6	2	2	570	27.1429	13.5714	26	Male	Married	0	High-school	Production worker	blue collar	1100	1.15304	No	No	0	64.9	1.67	23.2708	Normal weight	80	No	No	130	80	No	No	No	No	No	No	ELEVADA	0	0	0	No	No	No	1.01881	0.086638
4335	43	No	Yes	Non-metallic minerals	Large	6	2	2	570	27.1429	13.5714	26	Male	Married	1	Middle school	Production worker	blue collar	1200	1.25786	No	No	396	90.8	1.78	28.658	Overweight	98.3	No	No	130	80	No	No	No	No	No	No	ELEVADA	0	0	0	Yes	Yes	No	1.17554	0.11105
4336	43	No	Yes	Non-metallic minerals	Large	6	2	2	570	27.1429	13.5714	26	Male	Married	0	High-school	Production worker	blue collar	1100	1.17396	No	No	5400	78.6	1.77	25.0886	Overweight	90	No	No	120	60	No	No	No	No	No	No	NORMAL	0	0	0	No	No	No	0.849279	0.067424
4337	43	No	No	Non-metallic minerals	Large	6	2	2	570	27.1429	13.5714	29	Male	Single	0	High-school	Manufacturing technician	white collar	1500	1.57233	Yes	No	2480	73.1	1.7	25.2941	Overweight	86	Yes	No	140	100	No	No	Yes	No	No	No	ELEVADA	0	0	1
4338	43	No	Yes	Non-metallic minerals	Large	6	2	2	570	27.1429	13.5714	34	Male	Divorced	0	Middle school	Plant manager	white collar	3400	3.56394	No	No	918	89.4	1.73	29.8707	Overweight	99	Yes	No	130	100	No	No	No	No	No	No	ELEVADA	0	0	0	Yes	Yes	Yes	4.31065	1.31928
4339	43	No	Yes	Non-metallic minerals	Large	6	2	2	570	27.1429	13.5714	22	Male	Single	1	Middle school	Production worker	blue collar	937	0.98218	No	No	1600	80.9	1.63	30.449	Obesity I	98.5	No	No	130	80	No	No	No	No	No	No	ELEVADA	0	0	0	Yes	Yes	No	0.753478	0.055179
4340	43	No	Yes	Non-metallic minerals	Large	6	2	2	570	27.1429	13.5714	38	Male	Married	1	Middle school	Manufacturing technician	white collar	949	0.994759	No	No	0	67.9	1.64	25.2454	Overweight	83.3	No	No	120	90	No	No	No	No	No	No	ELEVADA	0	0	0	No	No	No	3.20764	0.712371
4341	43	No	Yes	Non-metallic minerals	Large	6	2	2	570	27.1429	13.5714	31	Male	Married	1	Middle school	Production worker	blue collar	1100	1.15304	No	No	247.5	82	1.645	30.3027	Obesity I	98	No	No	110	80	No	No	No	No	No	No	NORMAL	0	0	0	Yes	Yes	No	2.02588	0.448793
4342	43	No	Yes	Non-metallic minerals	Large	6	2	2	570	27.1429	13.5714	31	Male	Married	0	High-school	Machine operator	blue collar	1600	1.70758	Yes	No	60	53.2	1.66	19.3061	Normal weight	75	No	No	100	70	No	No	No	No	No	No	NORMAL	0	0	0	No	No	No	0.689844	0.053677
4343	43	No	Yes	Non-metallic minerals	Large	6	2	2	570	27.1429	13.5714	25	Male	Single	0	High-school	Production worker	blue collar	937	0.98218	No	No	2400	57.9	1.655	21.1389	Normal weight	71	No	No	120	80	No	No	No	No	No	No	NORMAL	0	0	0	No	No	No	0.764054	0.052624
4344	43	No	Yes	Non-metallic minerals	Large	6	2	2	30	30	15	38	Female	Married	1	High-school	Machine operator	white collar	1000	1.04822	No	No	1290	72.3	1.54	30.4857	Obesity I	91.6	No	No	160	100	No	No	No	No	No	No	ELEVADA	0	0	0	Yes	Yes	Yes	3.41434	0.486852
						1
						1
						1
						1
						1
						1
						1
						1
						1
						1
						1
						1
						1
						1
						1
						1
						1
						1
						1
						0
						1
						1
						1
						1
						1
						1
						1
						1
						1
						0
						1
						1
						1
						1
						1
						1
						1
						1
						1
						1
						1
						1
						1
						1
						1
						1
						0
						1
						1
						1
						1
						1
						1
						1
						1
						0
						0
						1
						1
						0
						0
						1
						1
						1
						1
						1
						0
						1
						1
						1
						0
						1
						1
						1
						0
						0
						0
						1
						1
						1
						0
						1
						1
						1
						1
						1
						1
						1
						1
						0
						1
						1
						0
						1
						0
						1
						0
						1
						1
						0
						0
						1
						0
						1
						0
						1
						1
						1
						1
						1
						1
						1
						1
						1
						1
						1
						1
						1
						1
						1
						1
						1
						0
						1
						1
						0
						1
						1
						1
						1
						0
						1
						1
						1
						1
						1
						1
						0
						1
						1
						1
						0
						1
						1
						1
						1
						1
						1
						1
						1
						1
						1
						1
						1
						1
						1
						0
						1
						0
						1
						0
						1
						1
						1
						1
						1
						1
						1
						1
						0
						1
						1
						1
						1
						1
						1
						1
						1
						1
						1
						1
						1
						1
						1
						1
						1
						1
						0
						1
						1
						1
						1
						0
						1
						1
						1
						1
						1
						1
						1
						1
						0
						0
						1
						1
						1
						1
						1
						1
						1
						1
						1
						0
						1
						0
						0
						1
						1
						1
						1
						1
						0
						0
						0
						1
						1
						1
						1
						1
						1
						1
						1
						1
						0
						1
						1
						1
						1
						1
						1
						1
						1
						1
						1
						0
						1
						1
						0
						1
						1
						0
						1
						1
						1
						1
						1
						1
						1
						1
						1
						0
						1
						1
						1
						1
						1
						1
						1
						1
						1
						1
						1
						1
						1
						1
						1
						1
						1
						0
						1
						1
						1
						1
						1
						1
						1
						1
						1
						1
						1
						1
						1
						1
						1
						0
						1
						1
						1
						1
						1
						1
						0
						1
						1
						1
						1
						1
						1
						1
						1
						1
						1
						1
						1
						0
						1
						1
						1
						1
						1
						0
						1
						1
						1
						1
						1
						1
						1
						1
						1
						1
						1
						1
						1
						1
						1
						1
						1
						1
						1
						1
						1
						1
						1
						1
						1
						1
						1
						1
						1
						1
						1
						1
						1
						1
						1
						1
						1
						1
						1
						1
						1
						1
						1
						1
						1
						1
						1
						1
						1
						1
						1
						1
						1
						1
						0
						1
						1
						1
						1
						0
						1
						1
						1
						1
						1
						1
						1
						1
						1
						1
						1
						1
						1
						1
						1
						1
						1
						1
						1
						1
						1
						1
						0
						1
						1
						1
						1
						1
						1
						1
						1
						1
						1
						1
						0
						1
						1
						1
						1
						1
						1
						1
						1
						1
						1
						1
						1
						1
						1
						1
						0
						1
						1
						1
						1
						1
						1
						0
						1
						1
						1
						1
						1
						1
						1
						0
						1
						0
						1
						1
						1
						1
						1
						1
						1
						0
						1
						1
						1
						1
						0
						0
						1
						0
						1
						0
						1
						1
						1
						0
						0
						1
						1
						1
						1
						1
						1
						1
						1
						1
						1
						1
						1
						1
						1
						1
						1
						1
						1
						1
						1
						1
						1
						1
						1
						1
						1
						1
						0
						0
						0
						0
						1
						1
						1
						1
						1
						1
						1
						1
						1
						1
						1
						1
						1
						1
						1
						1
						1
						1
						1
						0
						0
						1
						1
						1
						1
						1
						1
						1
						1
						1
						1
						1
						1
						1
						1
						1
						1
						1
						1
						1
						1
						1
						1
						1
						1
						1
						1
						1
						1
						1
						1
						1
						1
						1
						1
						1
						1
						0
						1
						1
						1
						0
						1
						1
						0
						1
						1
						1
						1
						1
						1
						0
						1
						1
						1
						1
						1
						1
						1
						1
						0
						1
						0
						1
						1
						1
						1
						1
						1
						1
						1
						1
						1
						1
						1
						1
						1
						1
						0
						0
						1
						1
						0
						0
						0
						1
						0
						1
						0
						0
						1
						1
						0
						1
						0
						1
						1
						1
						1
						1
						1
						1
						1
						1
						1
						1
						1
						1
						1
						1
						1
						1
						1
						1
						1
						1
						1
						1
						1
						1
						1
						0
						0
						1
						0
						1
						0
						0
						0
						0
						0
						0
						0
						0
						0
						1
						0
						0
						0
						0
						0
						0
						0
						1
						0
						0
						0
						0
						1
						0
						0
						0
						0
						0
						0
						0
						0
						0
						0
						1
						0
						0
						0
						0
						1
						0
						0
						0
						0
						0
						0
						0
						0
						0
						0
						0
						0
						0
						0
						0
						0
						0
						0
						0
						0
						0
						0
						0
						0
						0
						0
						0
						0
						0
						0
						0
						0
						0
						0
						0
						1
						0
						1
						1
						1
						1
						1
						1
						1
						1
						1
						1
						1
						1
						1
						1
						1
						1
						0
						0
						0
						0
						0
						1
						1
						1
						0
						0
						0
						0
						1
						0
						1
						1
						1
						0
						0
						0
						0
						0
						0
						1
						0
						0
						0
						0
						0
						0
						0
						0
						0
						0
						0
						0
						0
						0
						0
						0
						0
						0
						0
						0
						0
						0
						0
						0
						0
						0
						0
						0
						0
						0
						0
						0
						0
						0
						0
						0
						1
						1
						0
						1
						0
						1
						1
						0
						1
						1
						1
						0
						1
						0
						1
						0
						1
						1
						1
						1
						0
						1
						1
						0
						1
						0
						1
						0
						1
						1
						1
						1
						1
						1
						1
						1
						1
						1
						1
						0
						1
						1
						0
						1
						1
						1
						0
						0
						1
						0
						1
						1
						1
						0
						0
						0
						1
						1
						1
						0
						1
						1
						0
						1
						1
						0
						0
						1
						1
						1
						1
						1
						0
						1
						1
						0
						0
						1
						0
						0
						0
						1
						0
						0
						1
						1
						1
						1
						0
						1
						0
						1
						0
						1
						1
						1
						1
						1
						1
						1
						1
						0
						0
						0
						1
						0
						1
						1
						1
						1
						1
						1
						1
						1
						0
						0
						0
						0
						1
						1
						1
						0
						1
						1
						1
						1
						1
						1
						1
